# Supplementary material for: Pyruvate kinase M2 regulates mitochondrial homeostasis in cisplatin-induced acute kidney injury
Source: PubMed Central journal article supplement (PMC10564883; doi:10.1038/s41419-023-06195-z), 2023-10-10

Figure 1 A

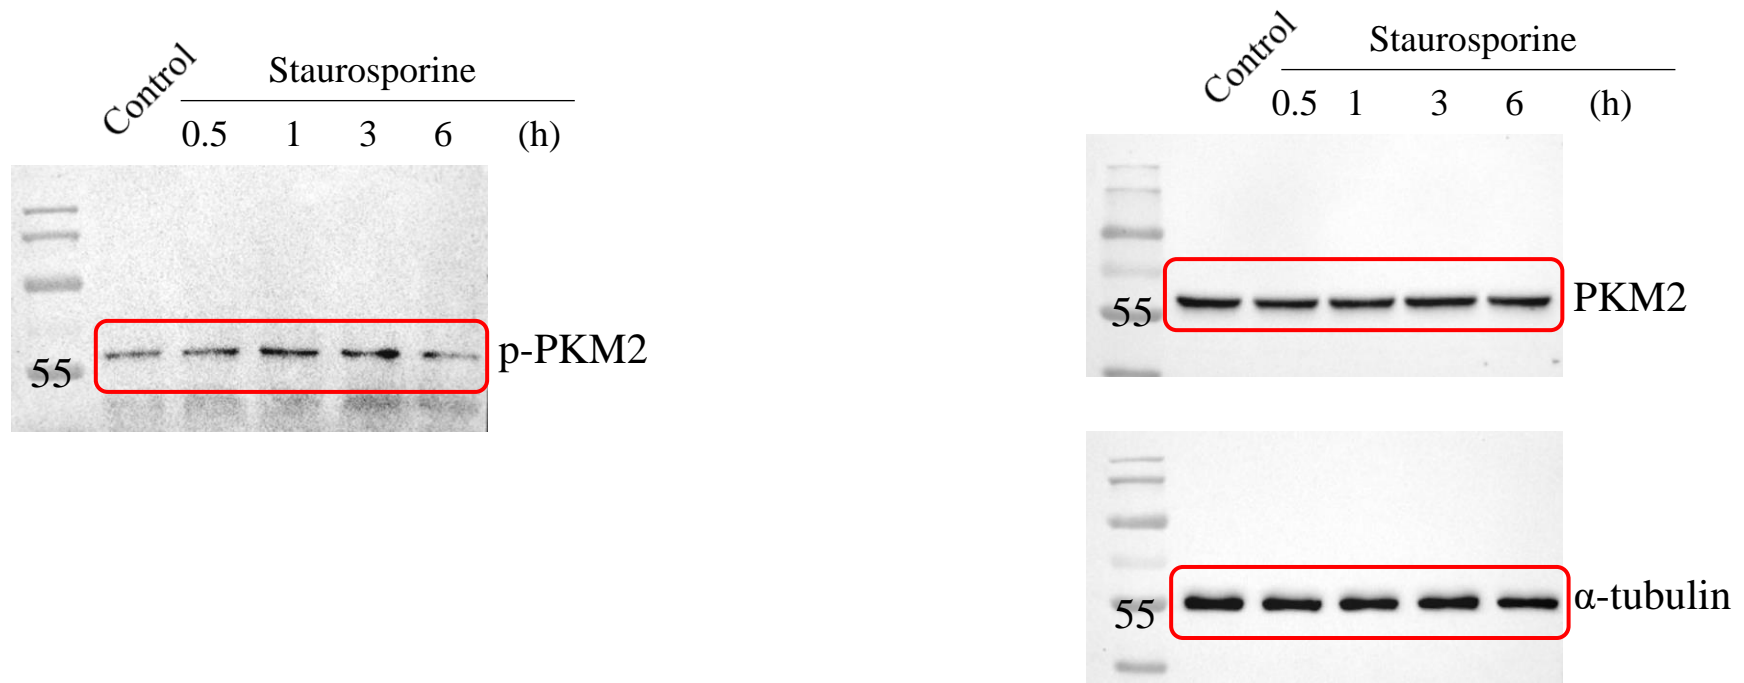

Figure 1 B

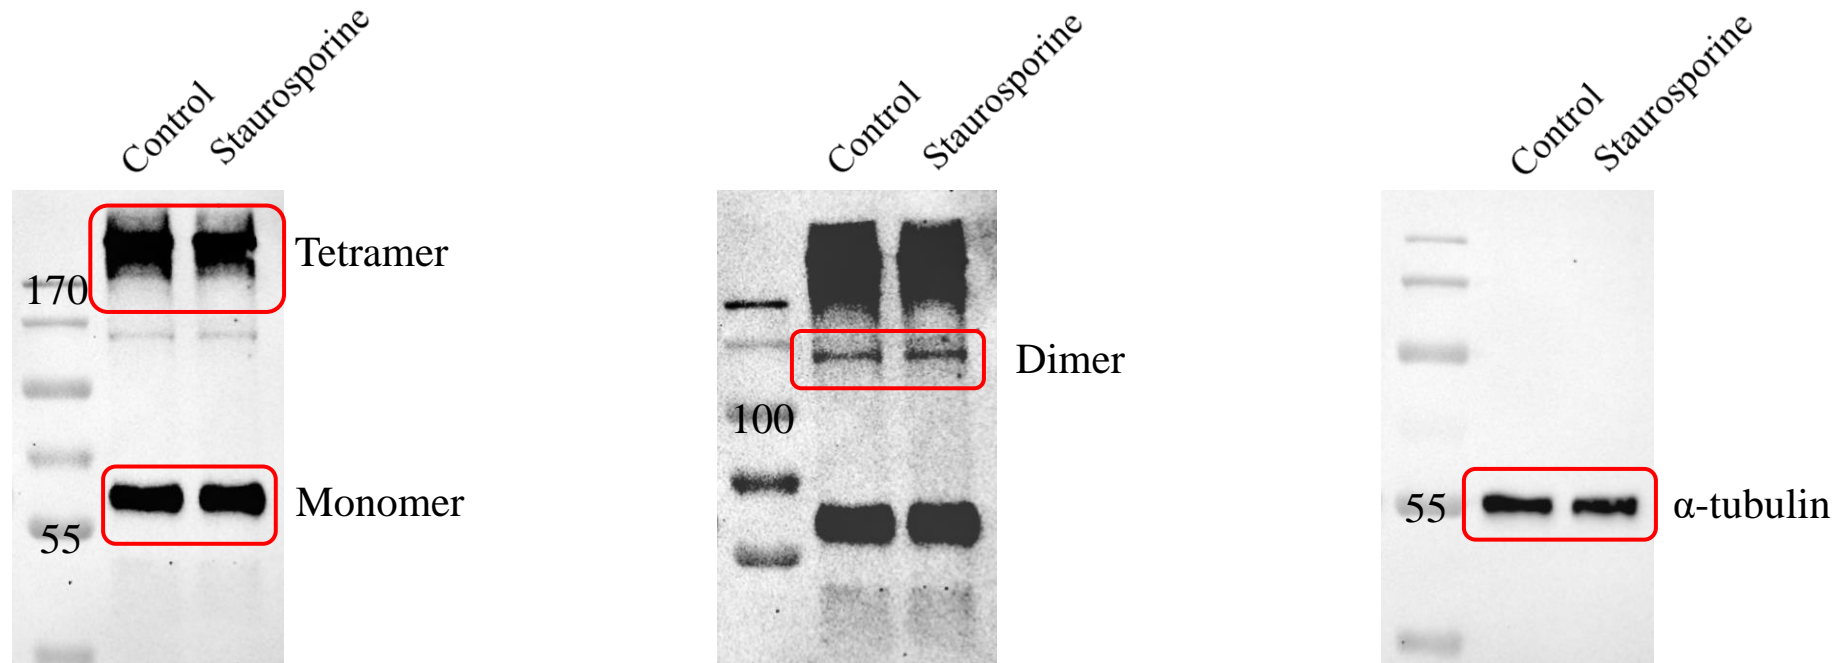

Figure 1 C

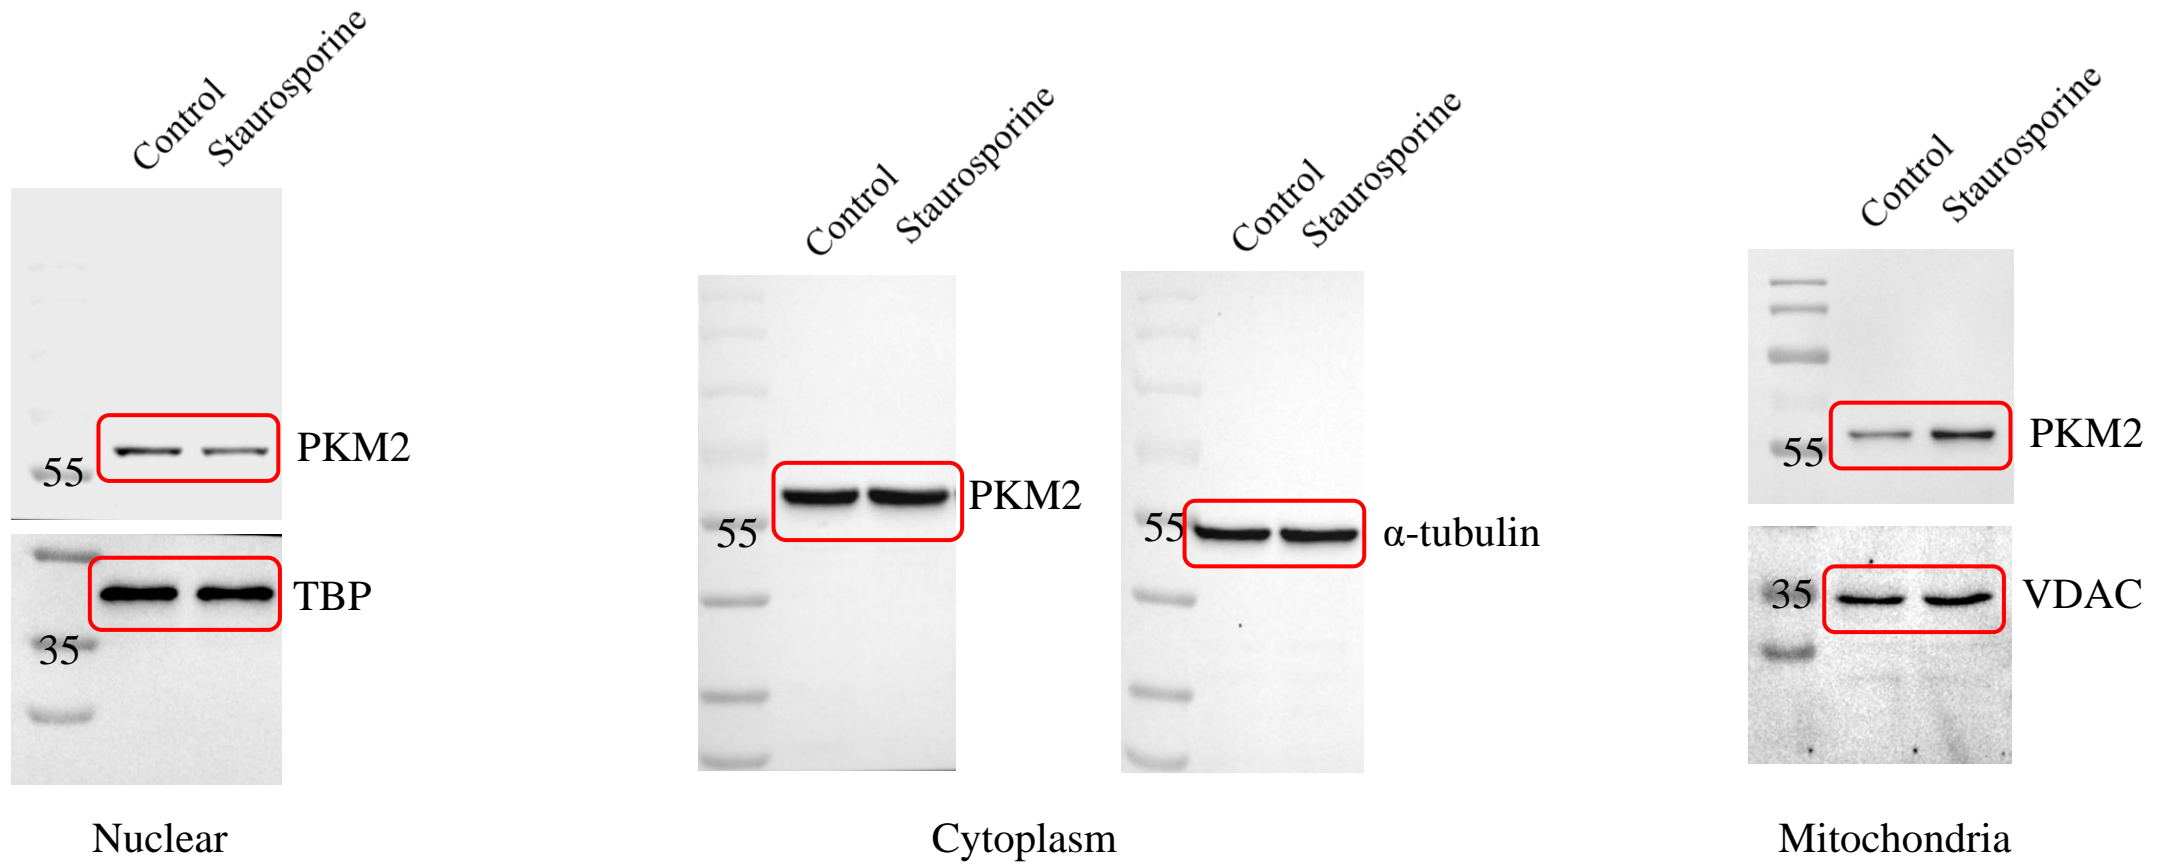

Figure 1 E

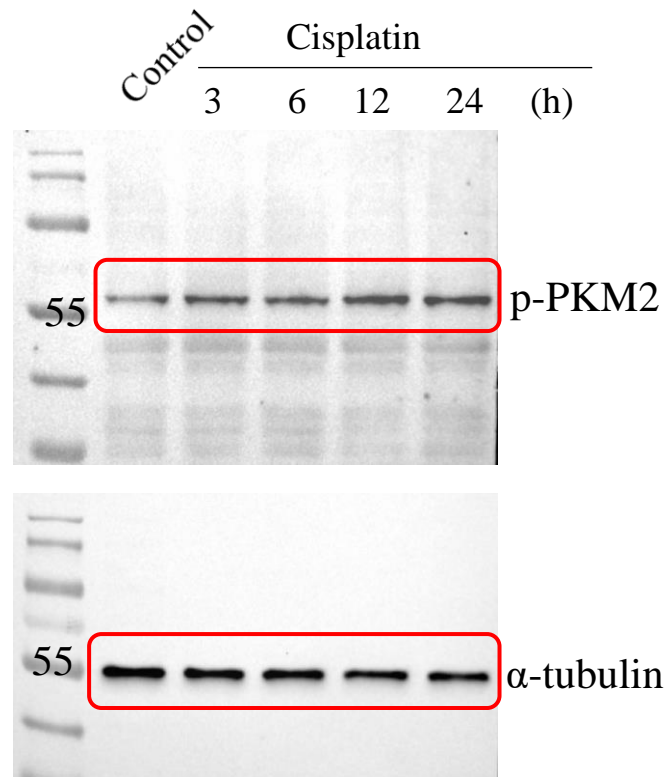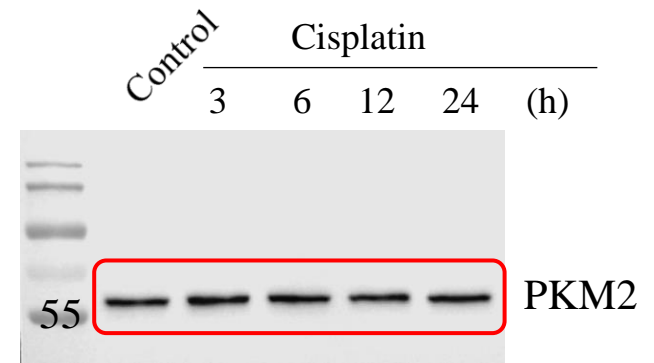

Figure 1 F

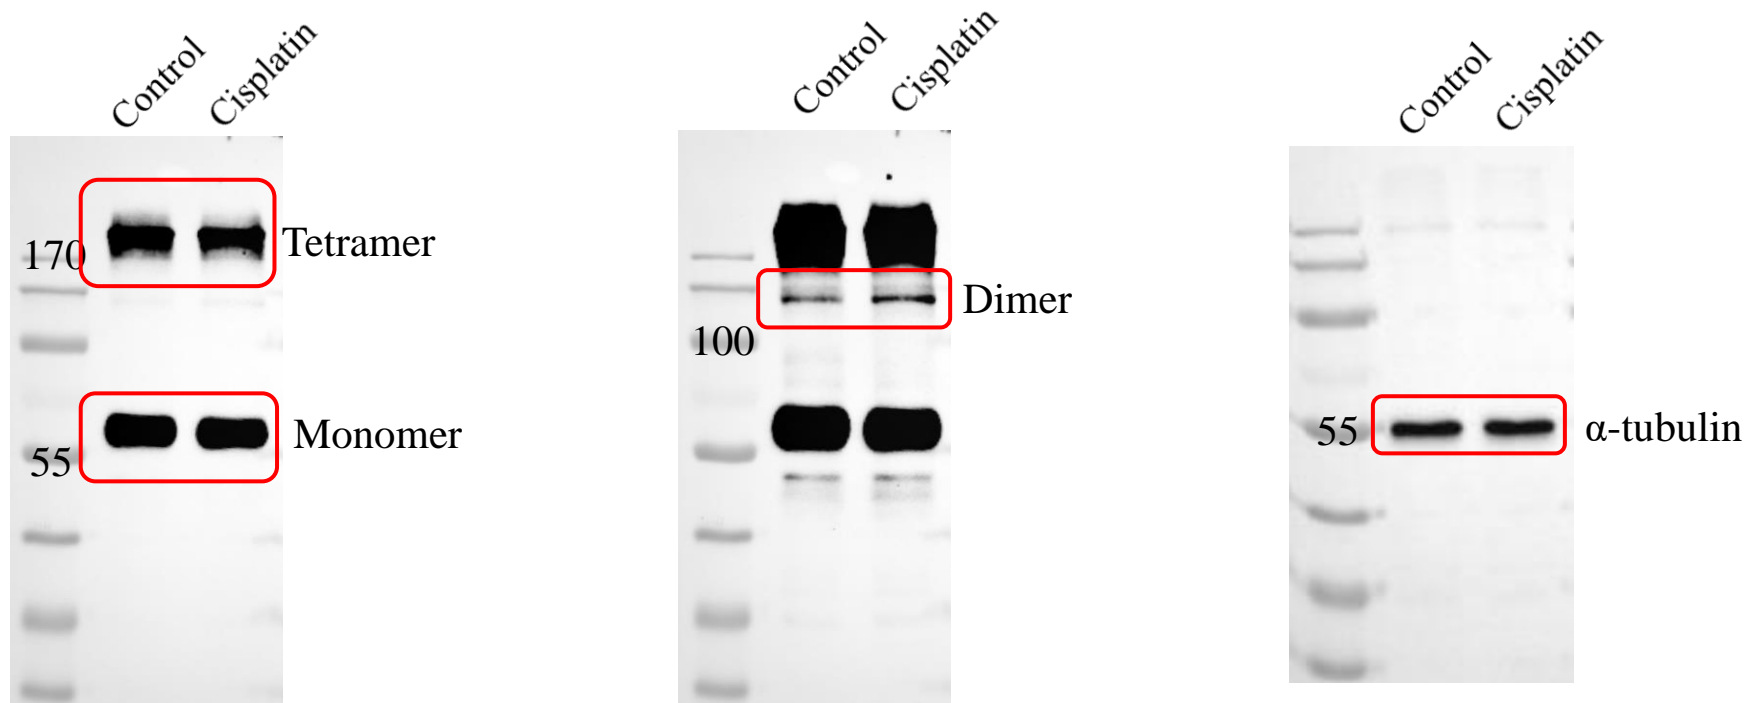

Figure 1 G

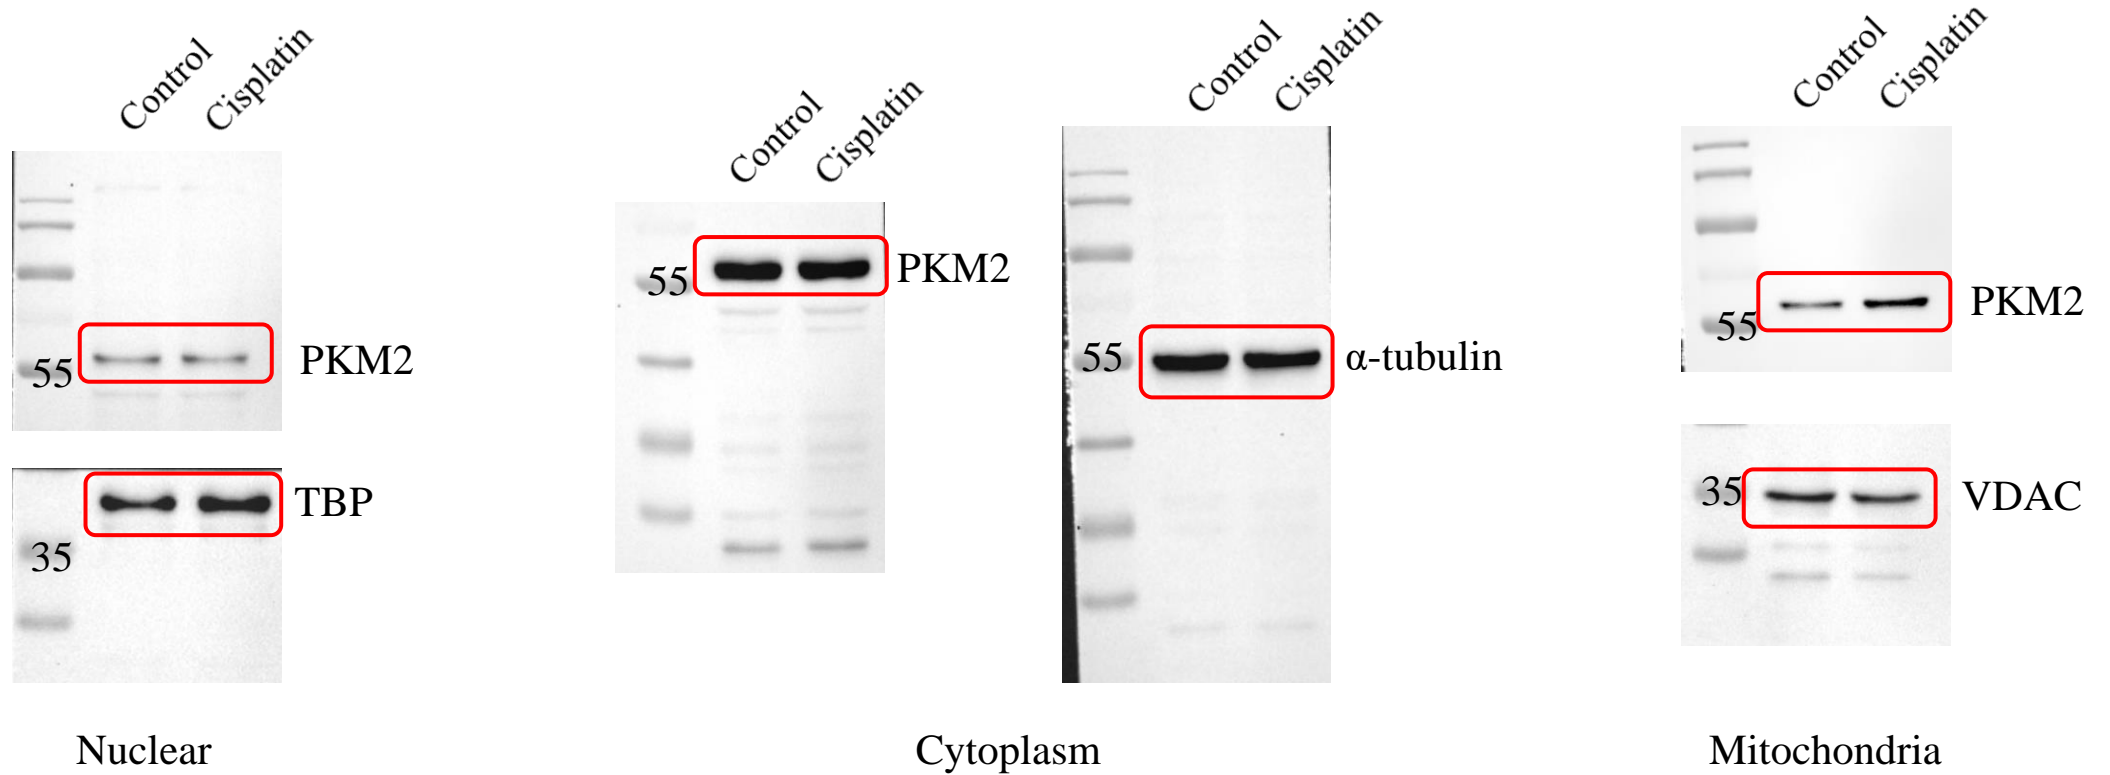

Figure 1 I

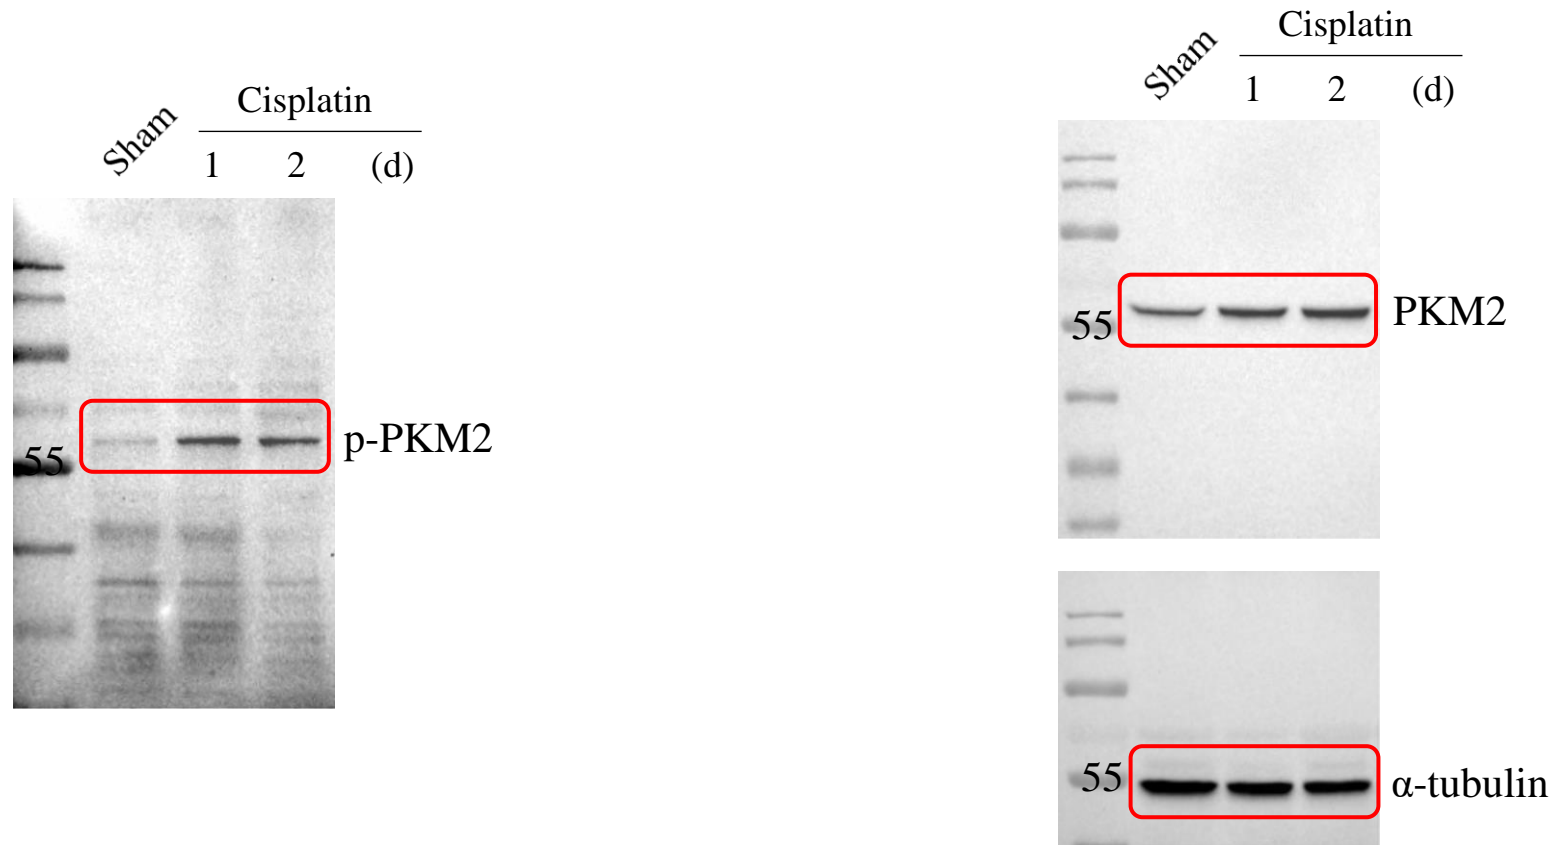

Figure 1 J

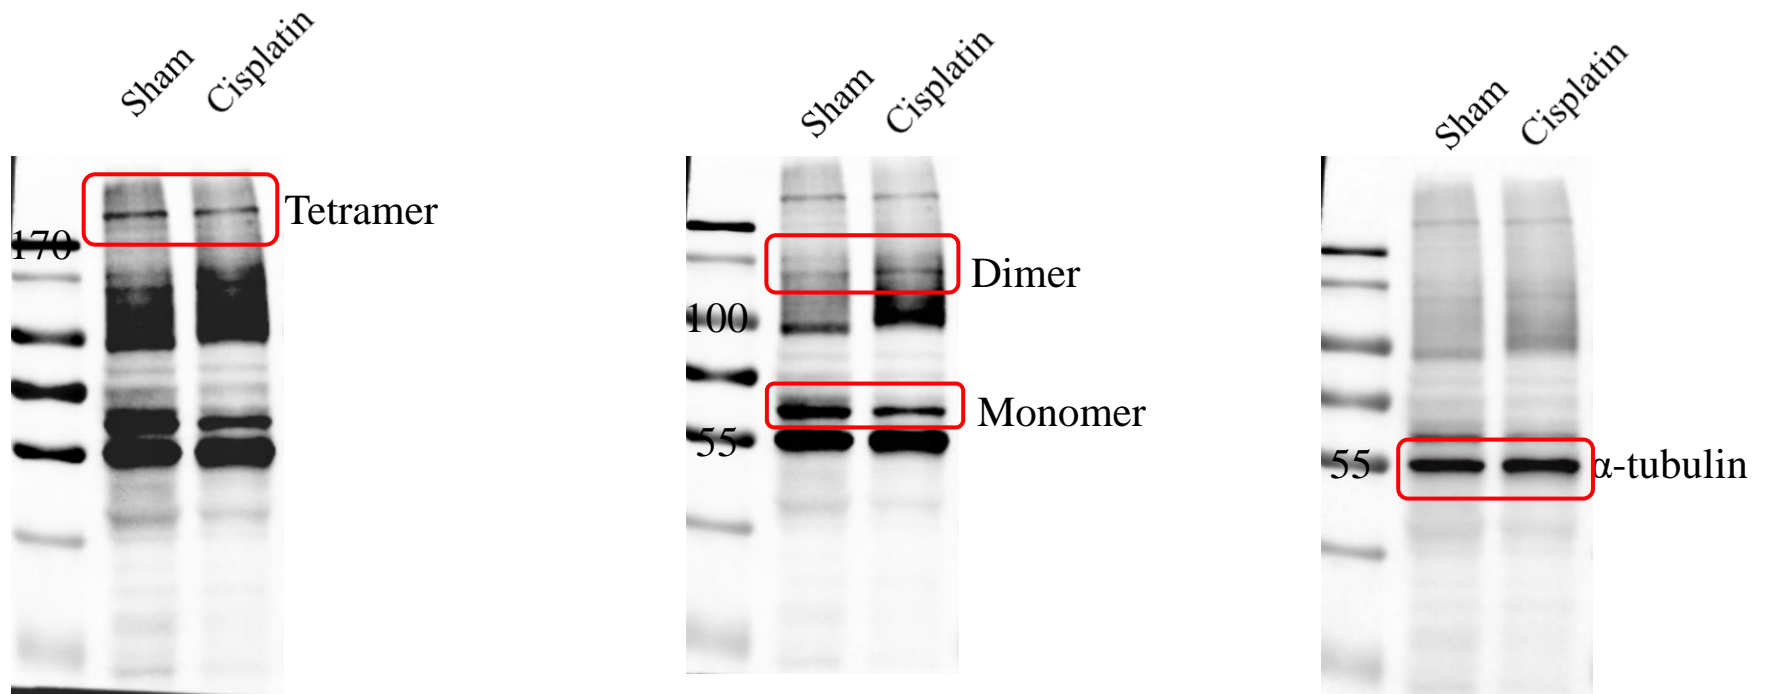



Figure 1 K

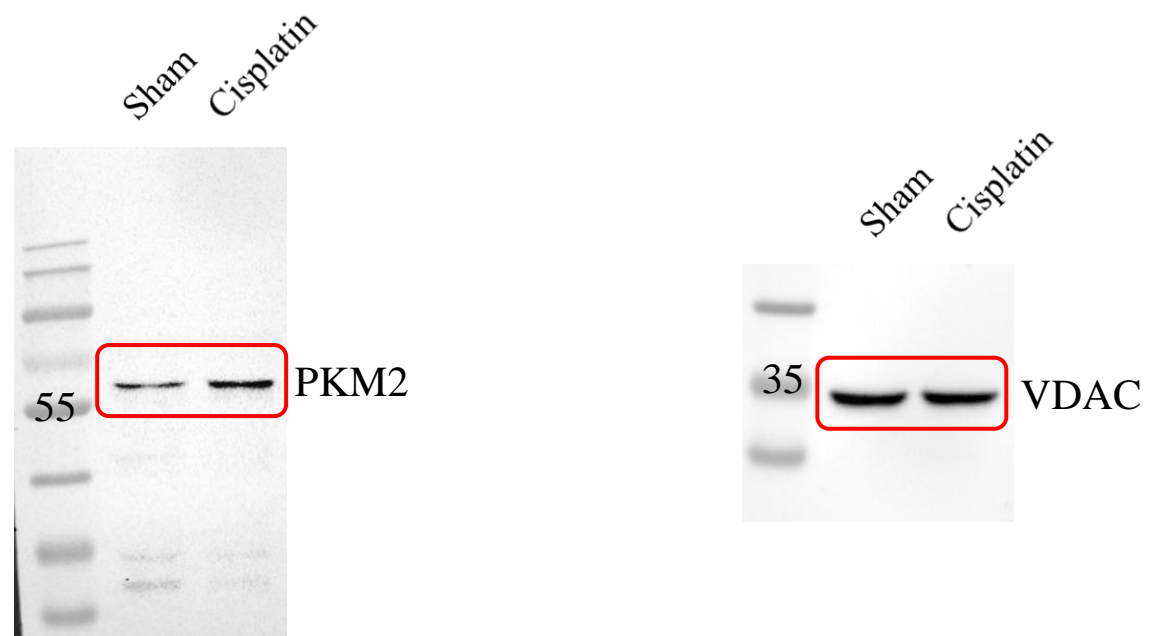

Figure 2 D

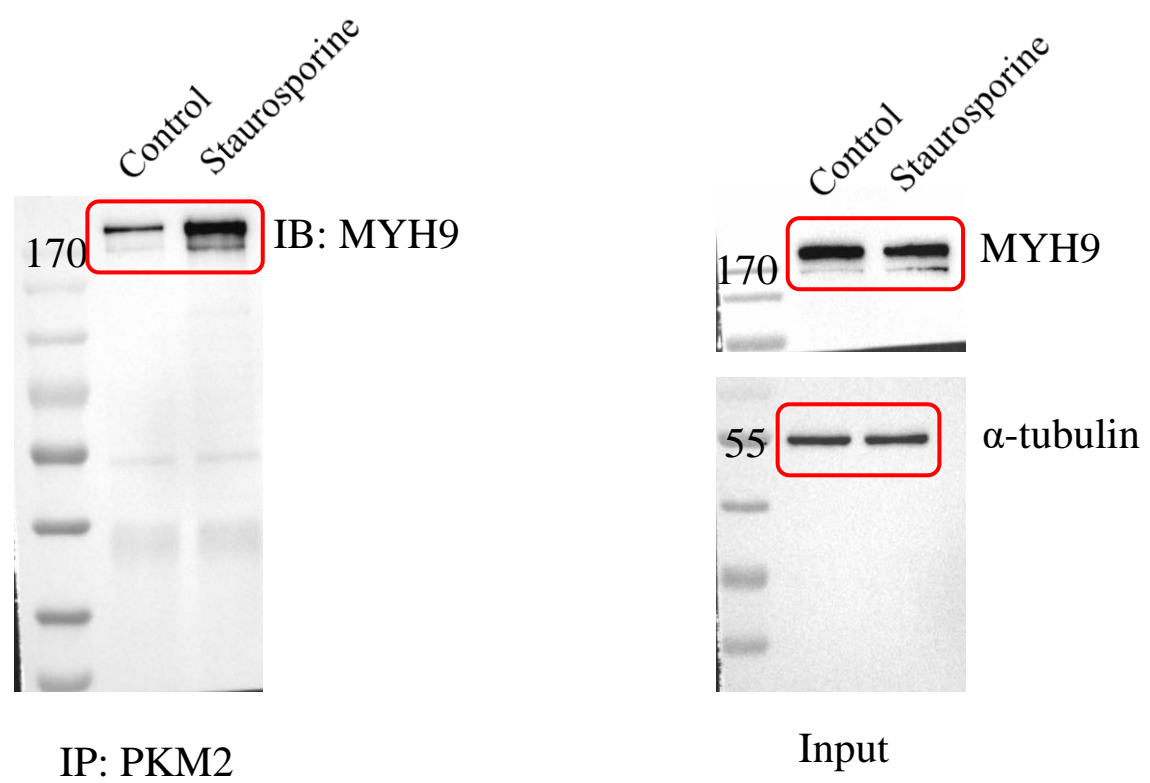

Figure 2 E

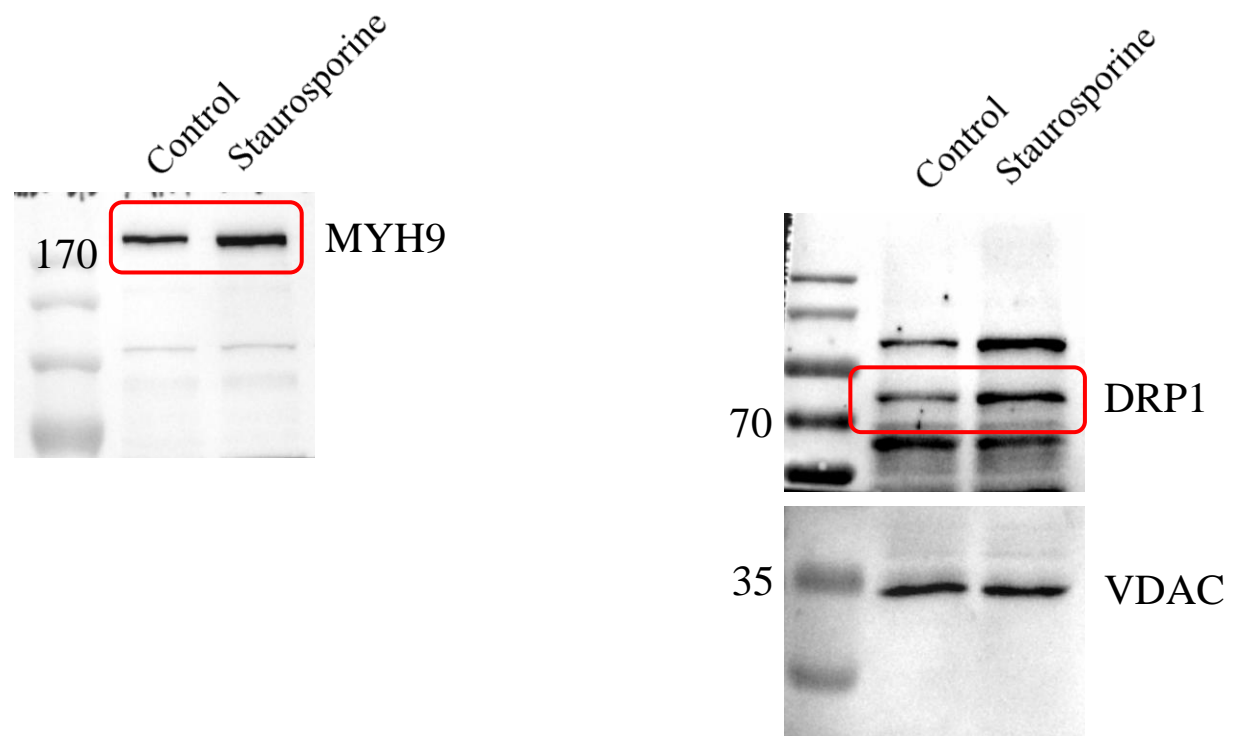

Figure 2 F

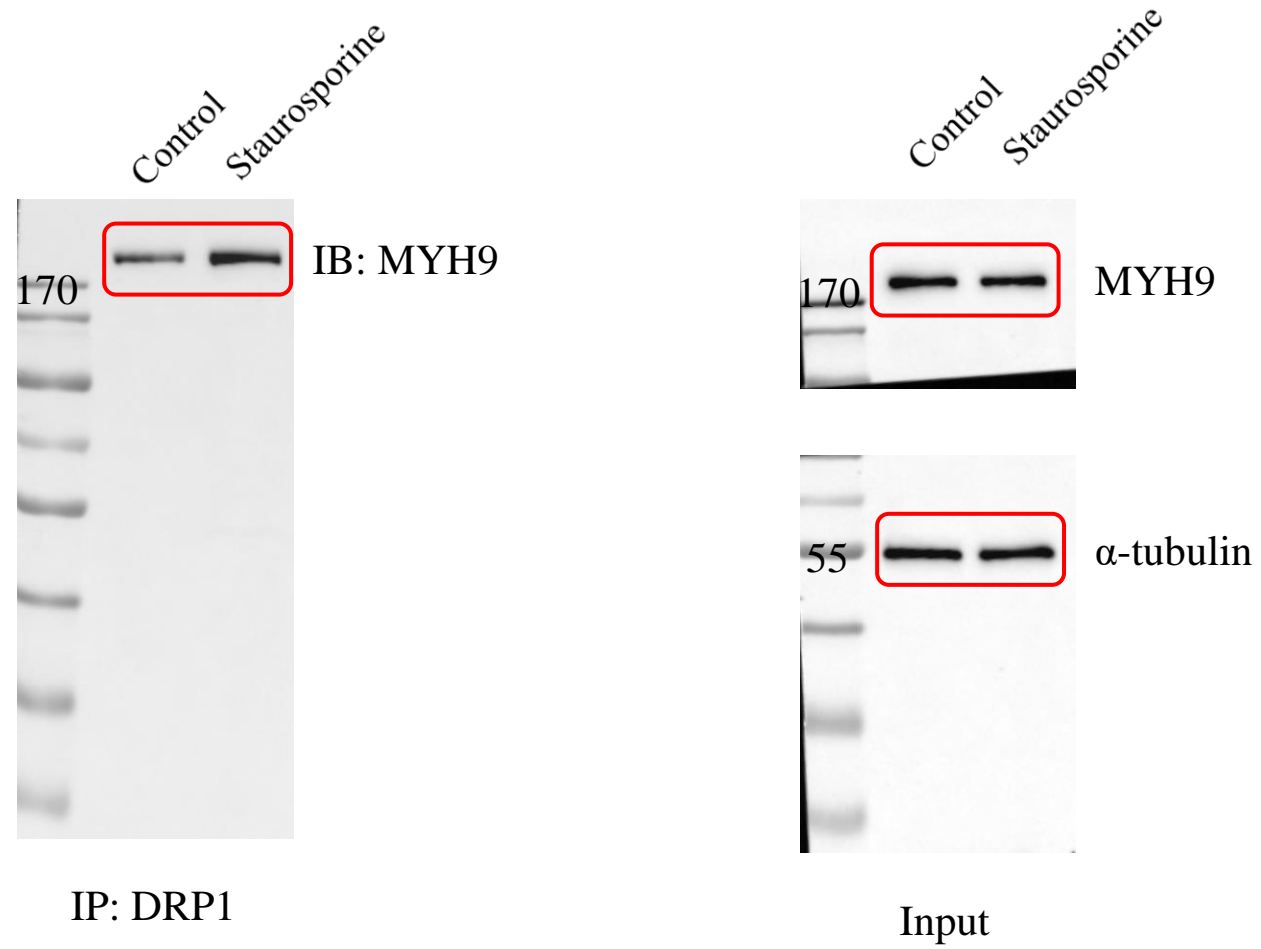

Figure 2 G

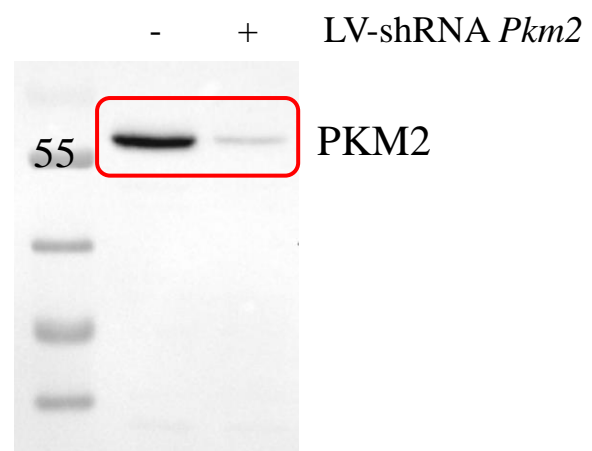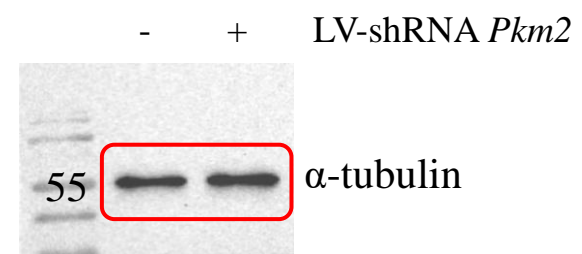

Figure 2 H

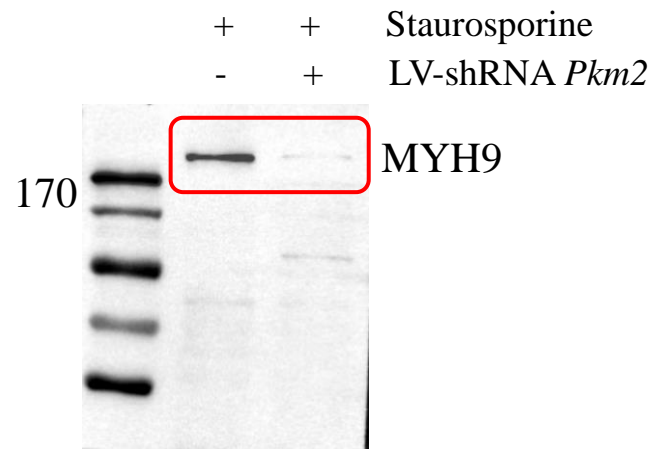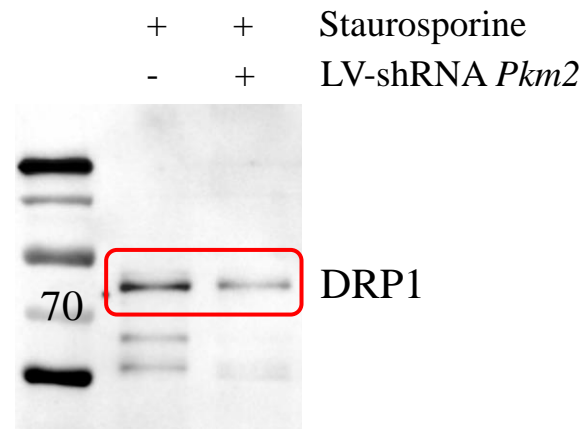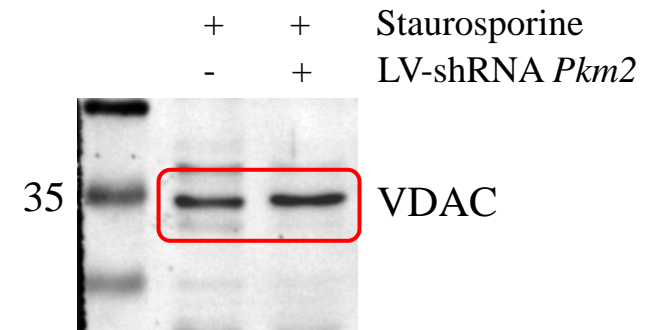

Figure 2 K

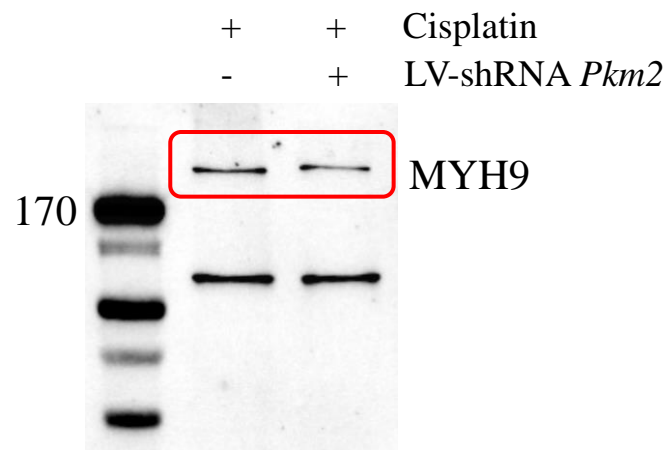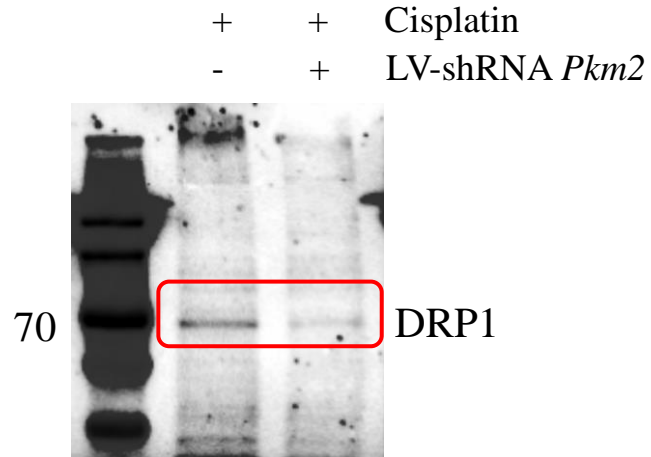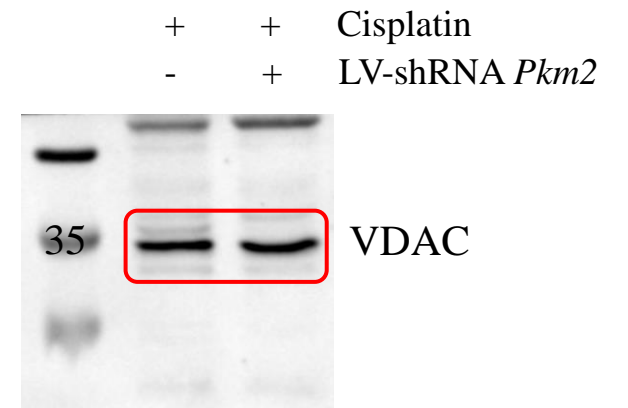

Figure 2 N

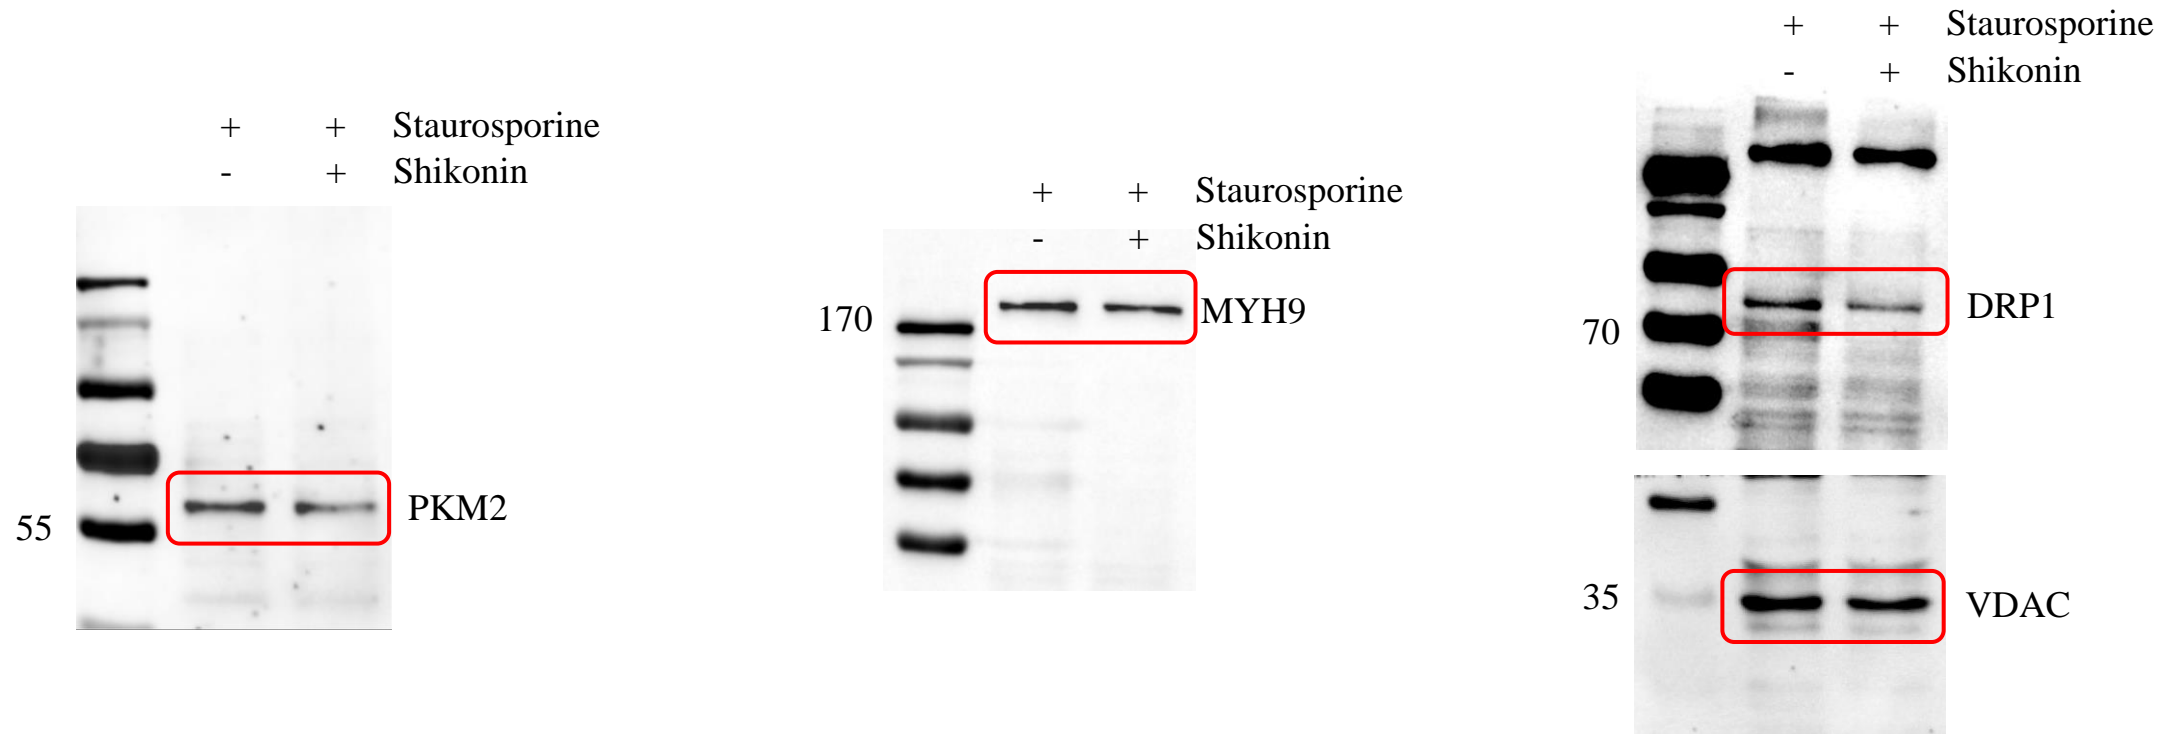



Figure 2 O

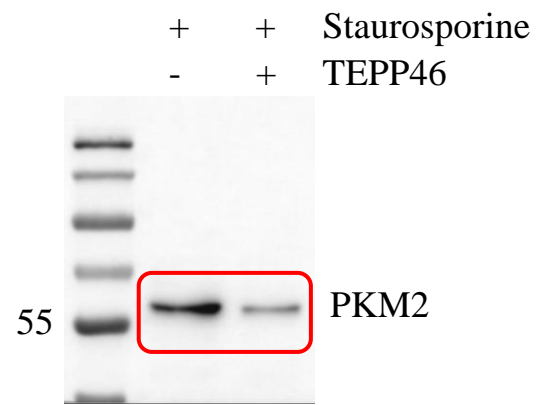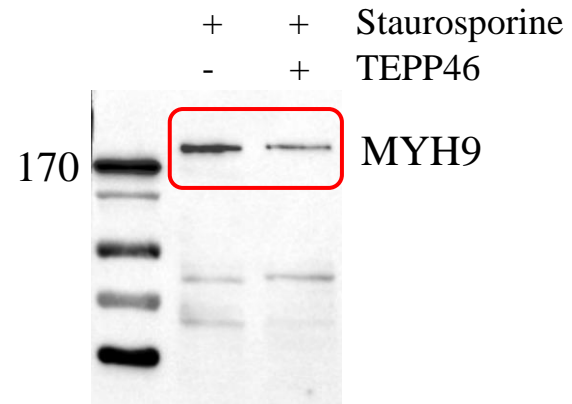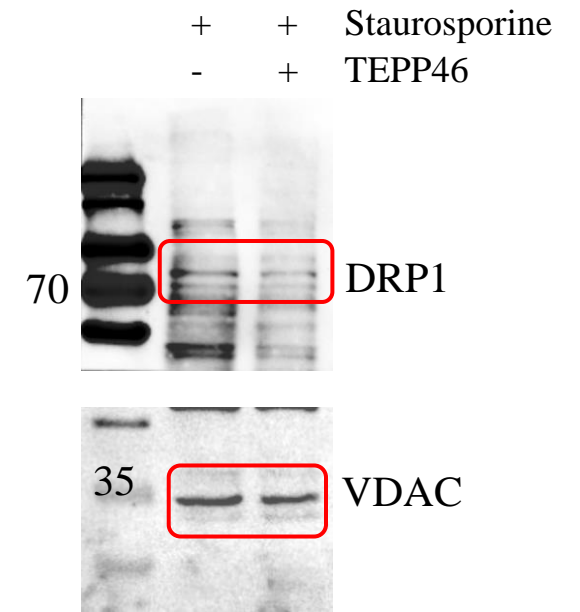

Figure 2 P

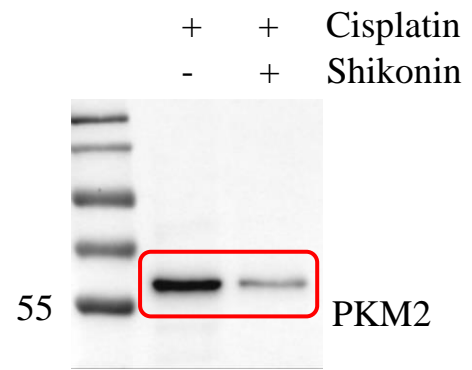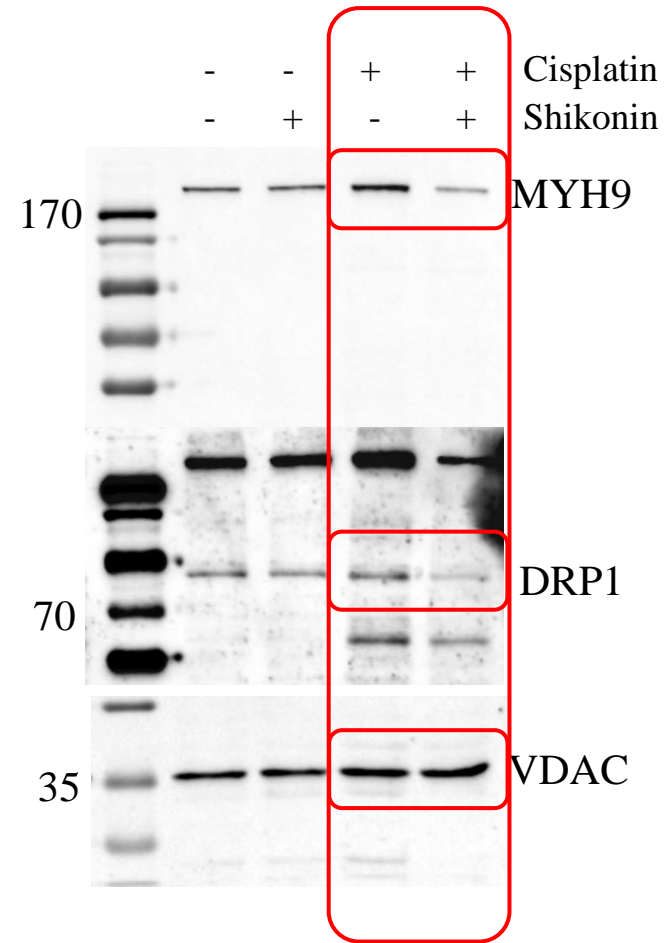

Figure 2 Q

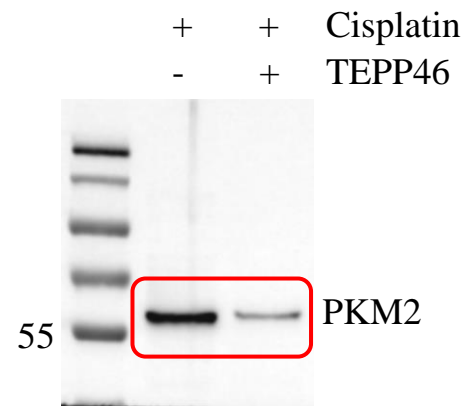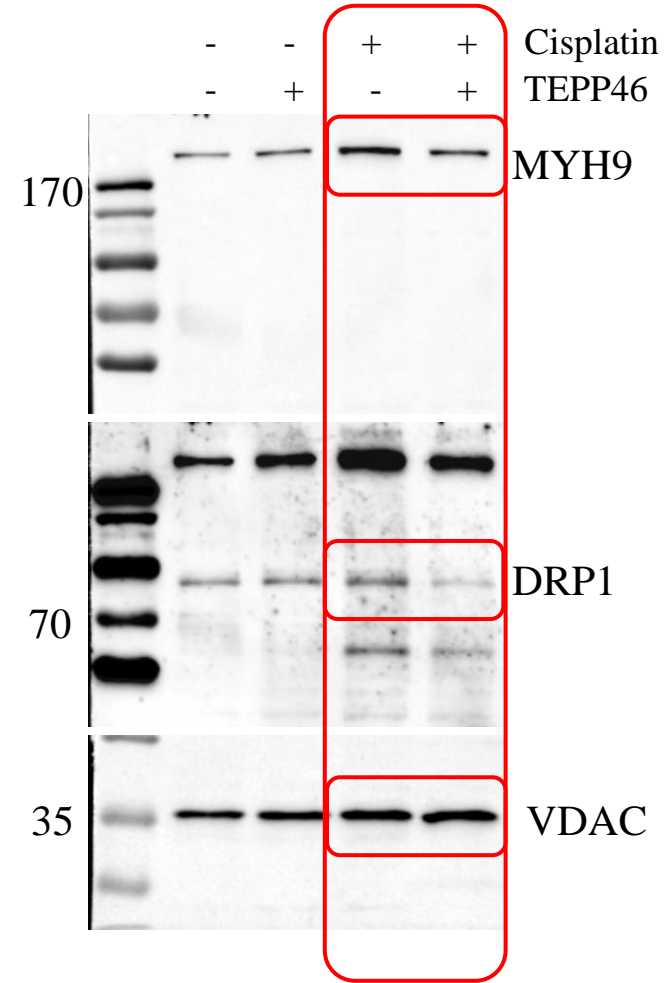

Figure 3 A

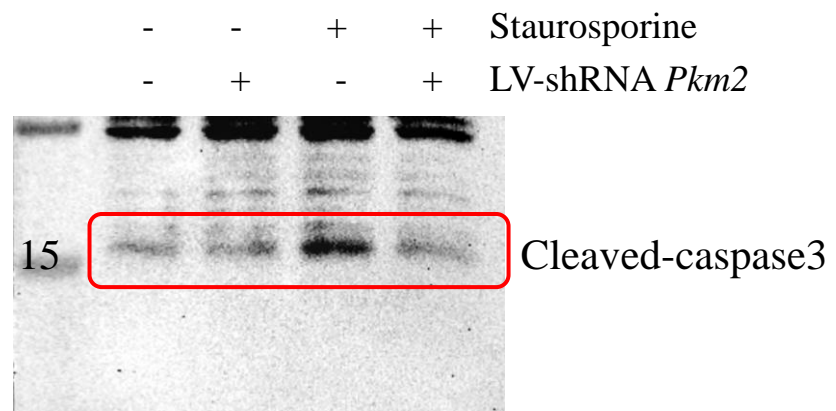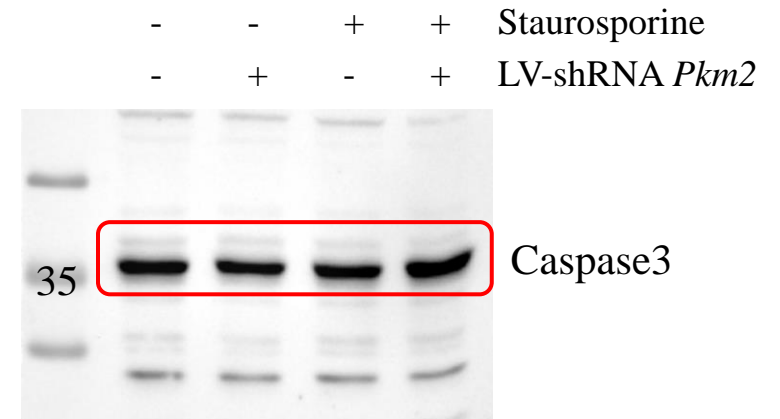

Figure 3 A

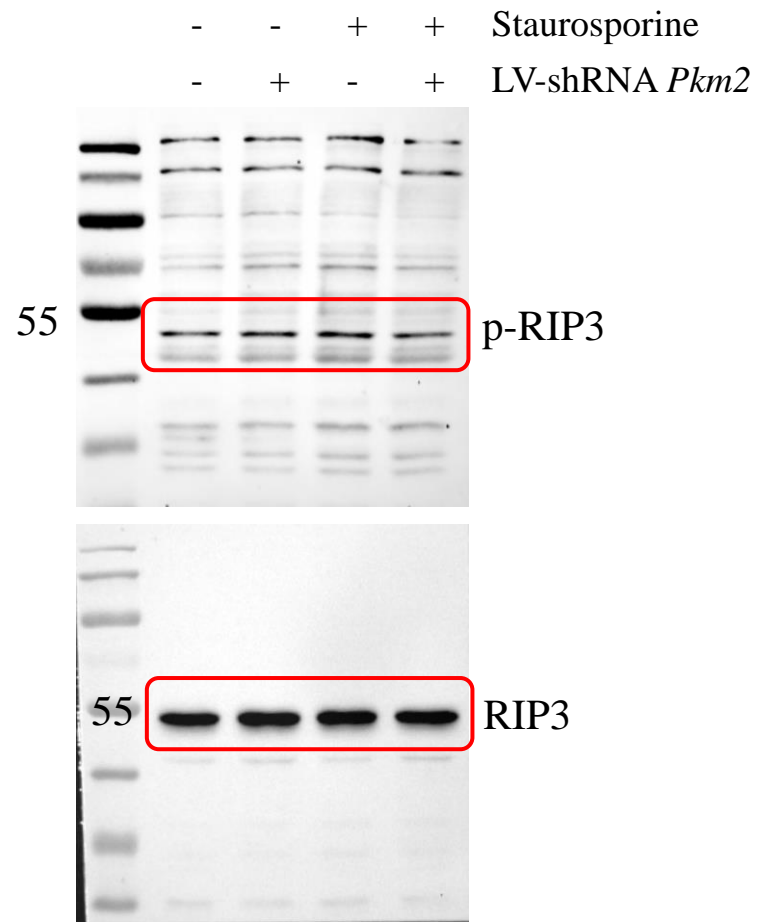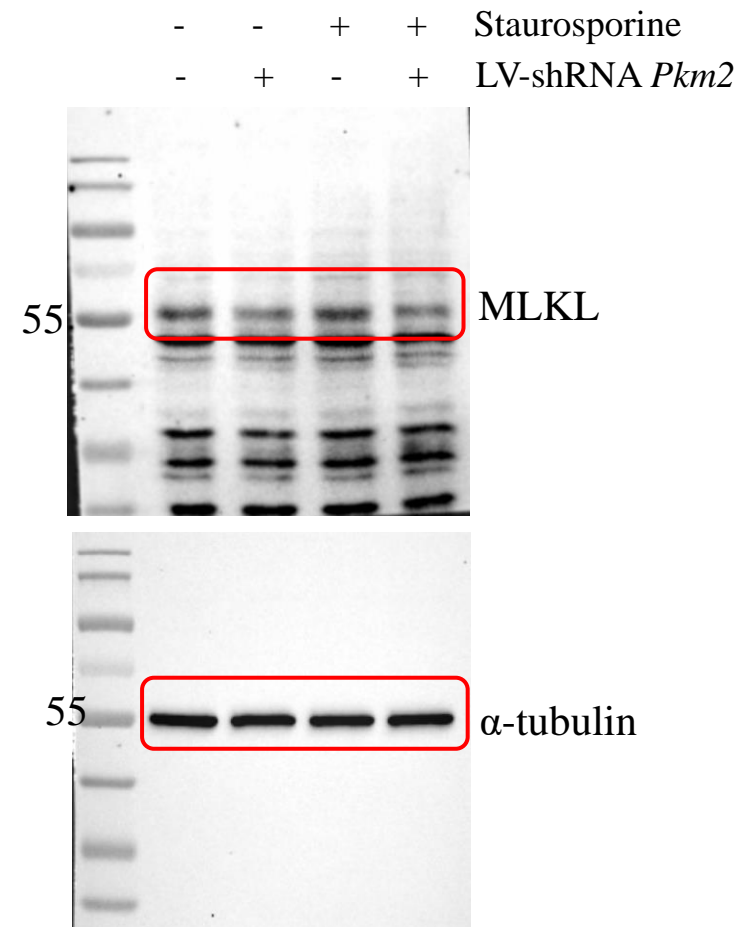

Figure 3 D

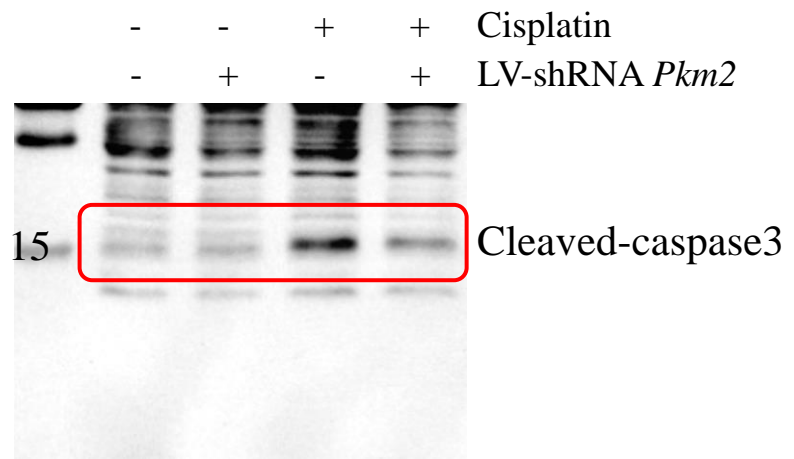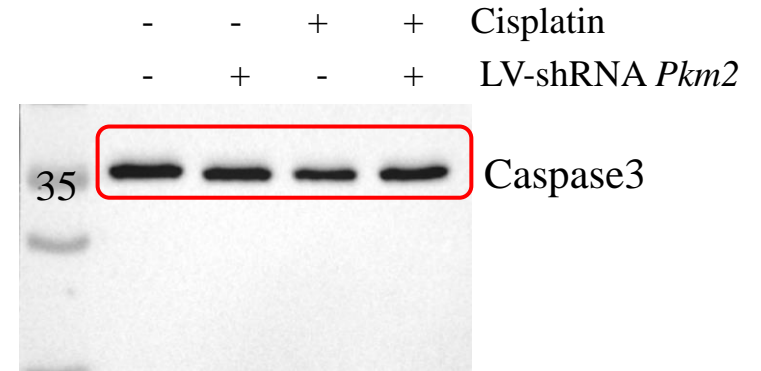

Figure 3 D

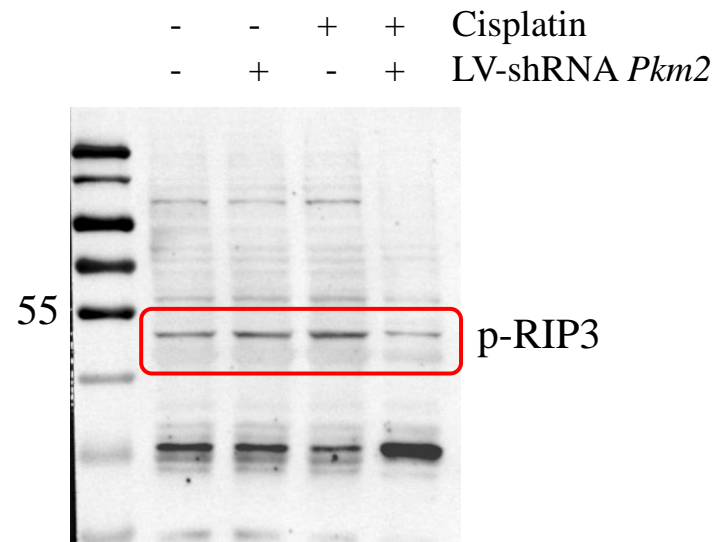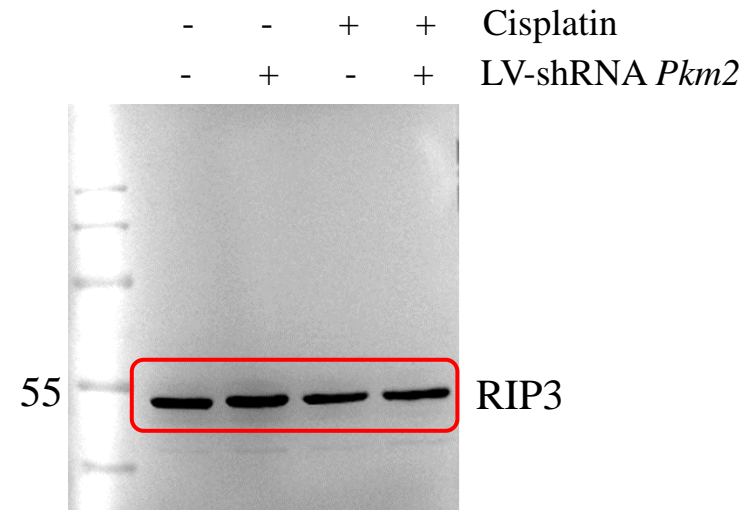

Figure 3 D

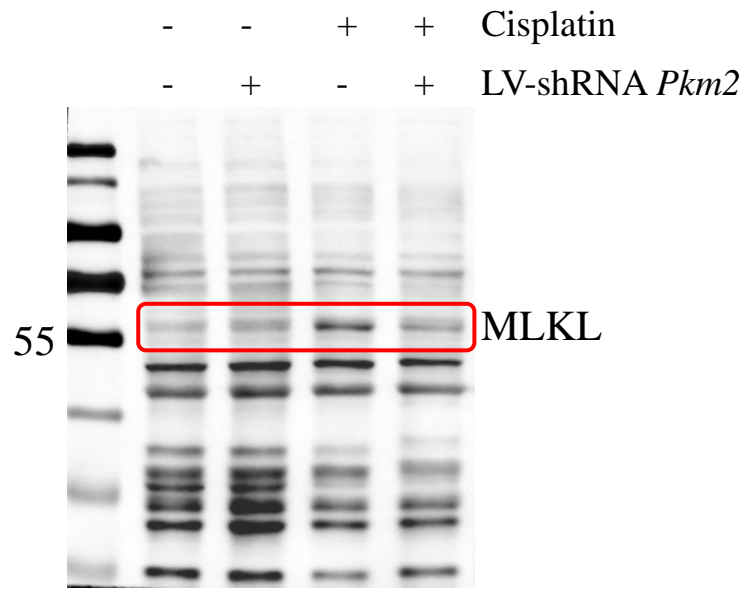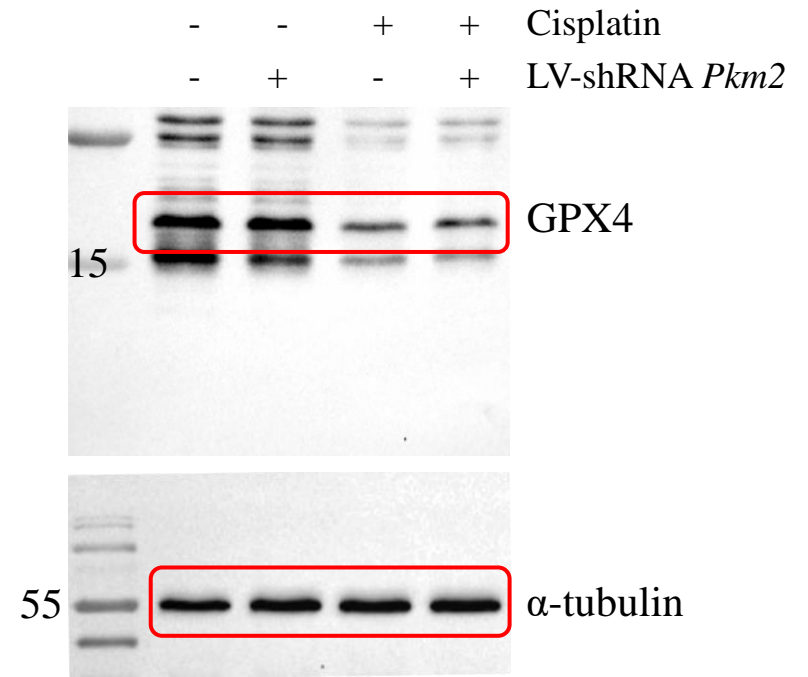



Figure 4 A

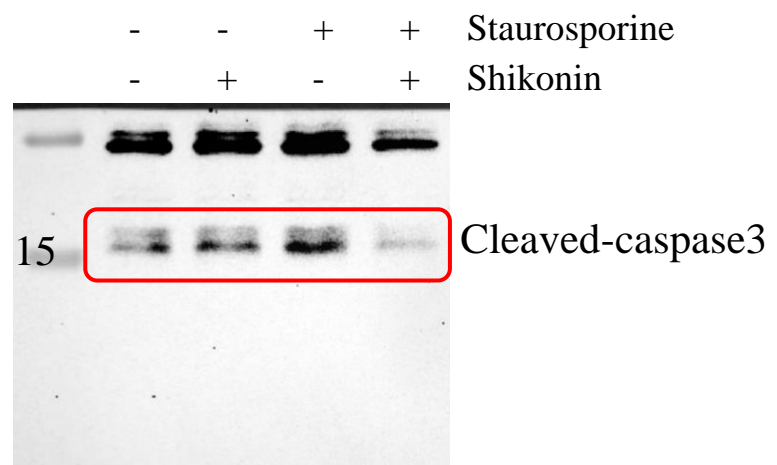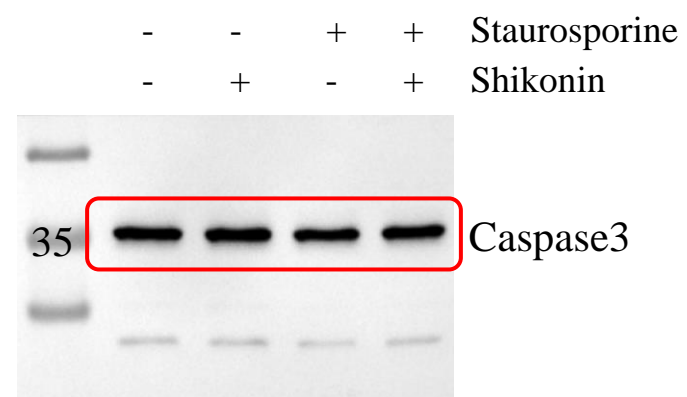

Figure 4 A

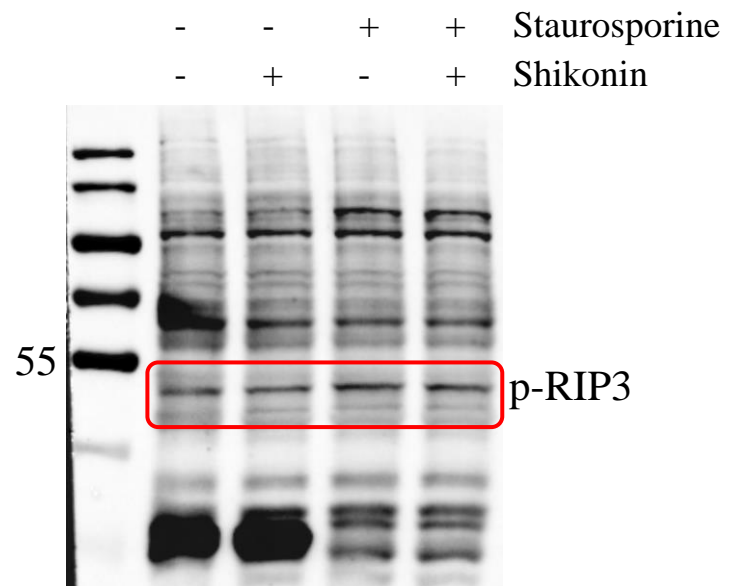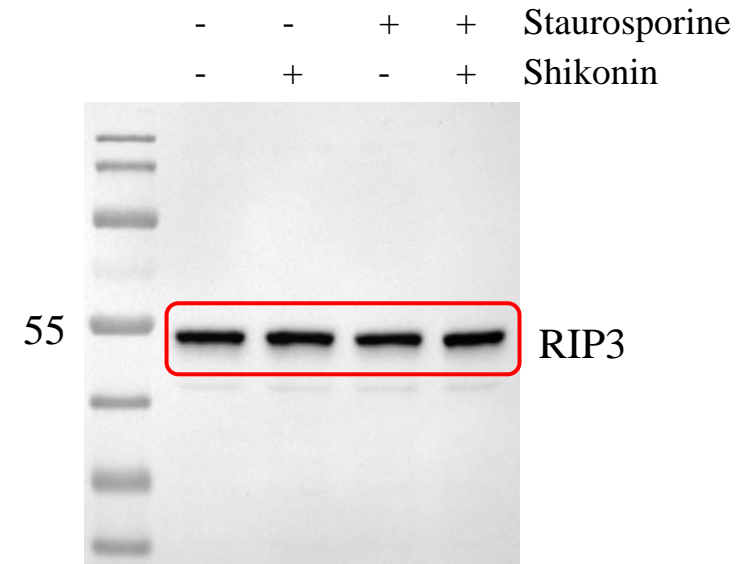

Figure 4 A

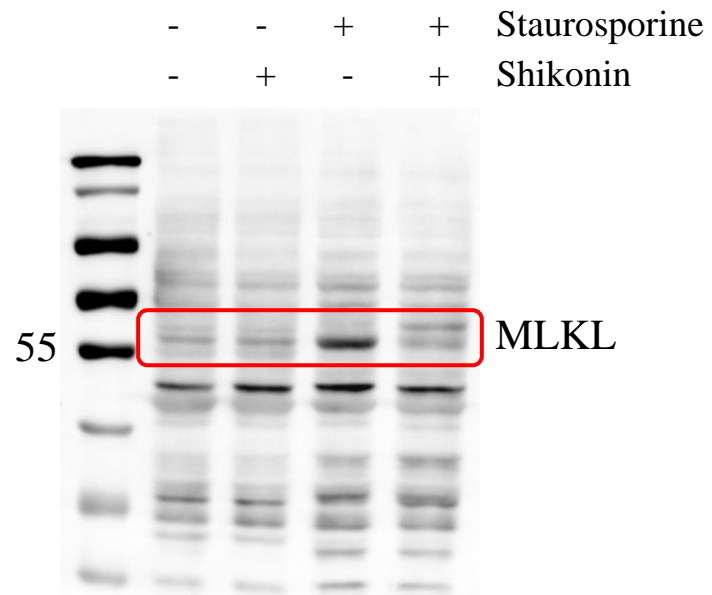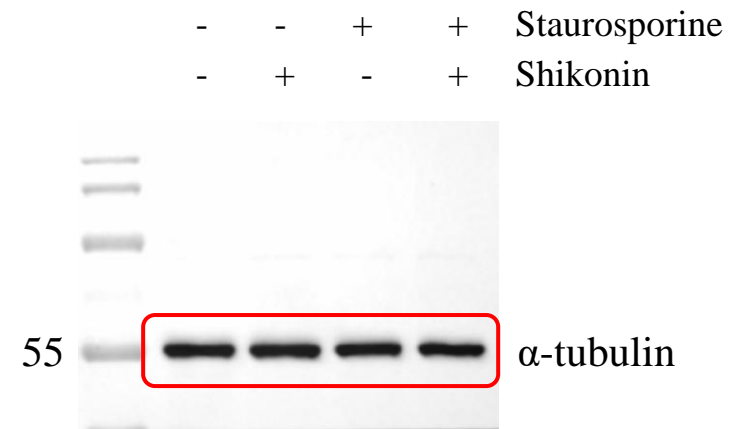

Figure 4 E

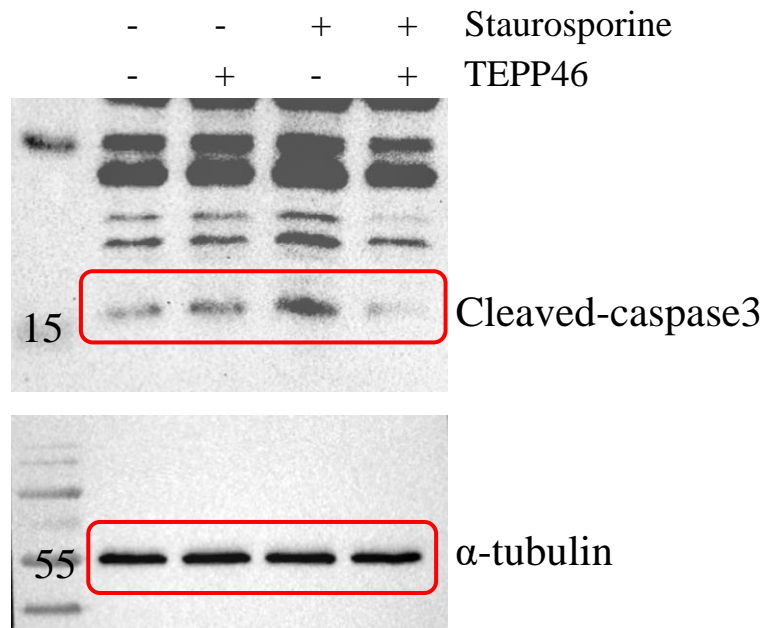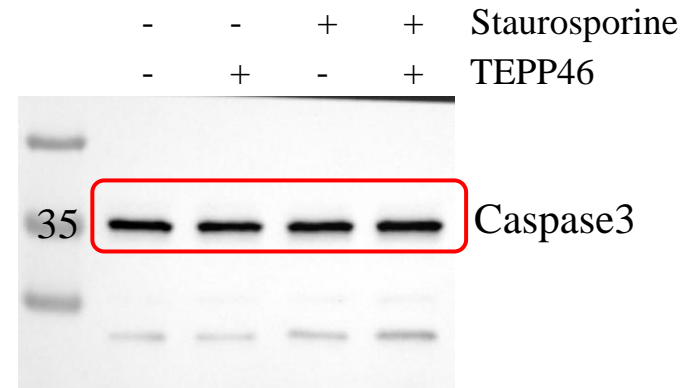

Figure 4 E

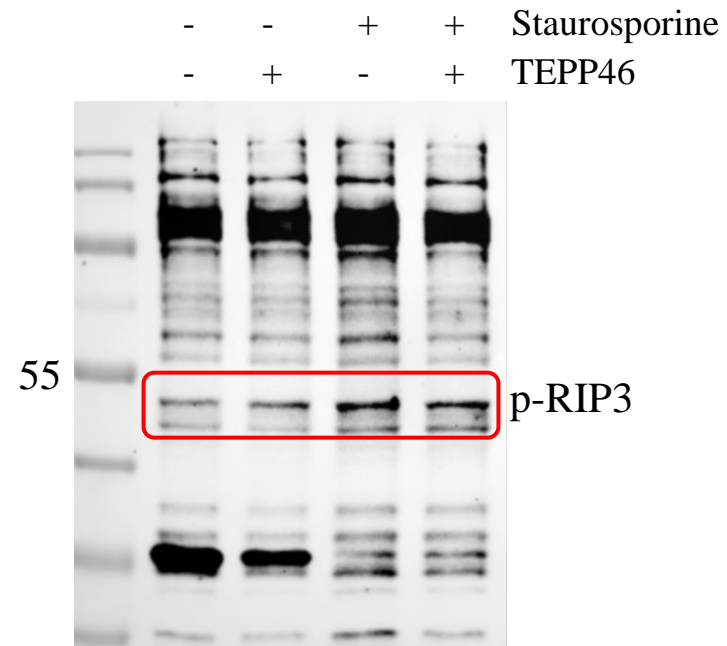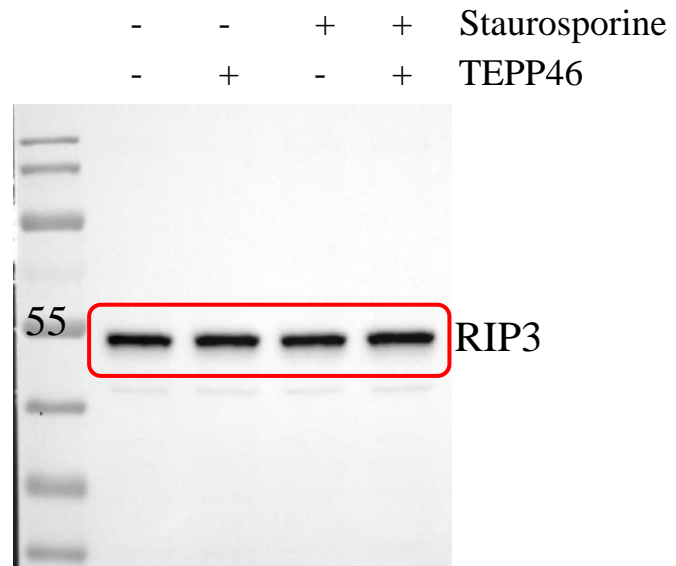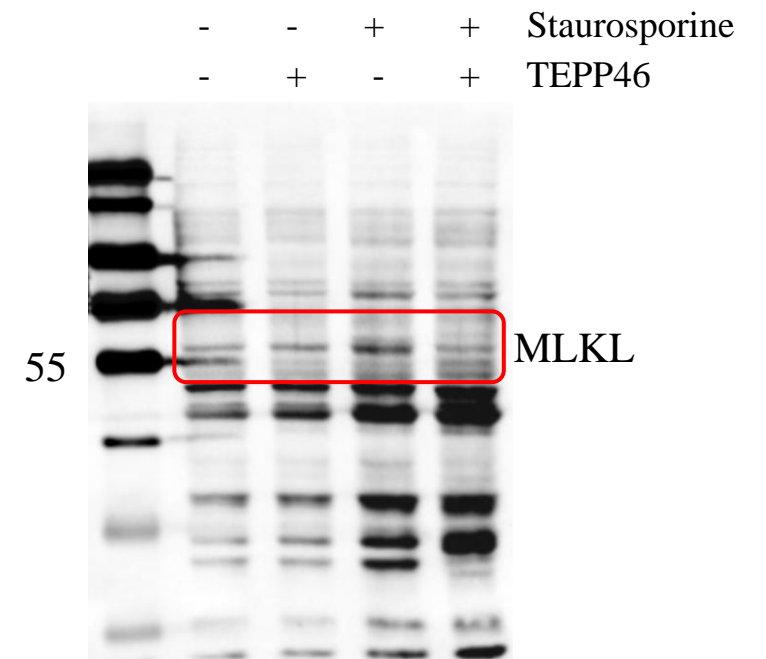

Figure 4 I

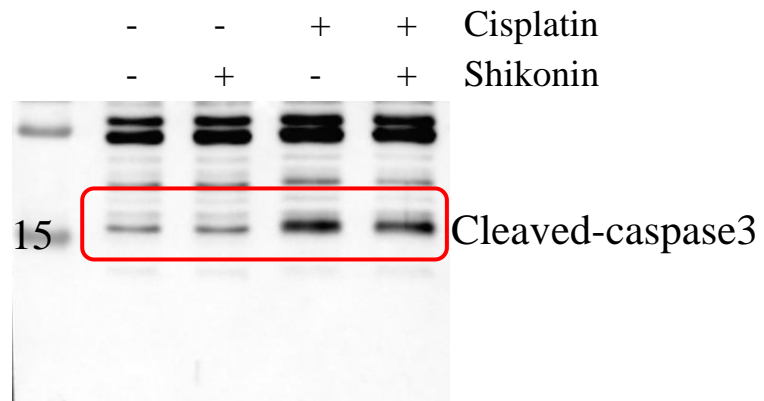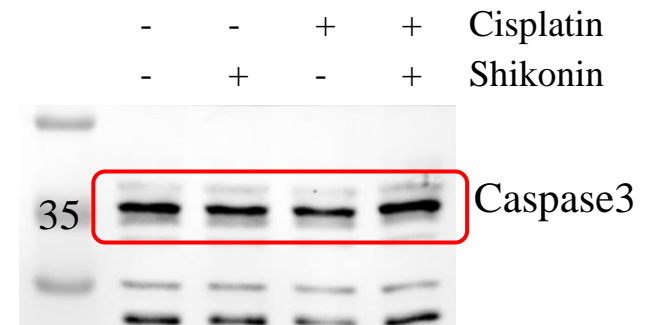

Figure 4 I

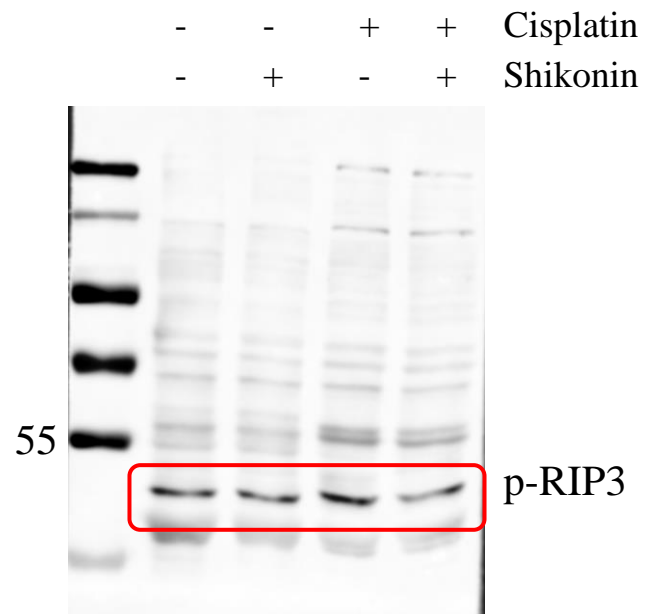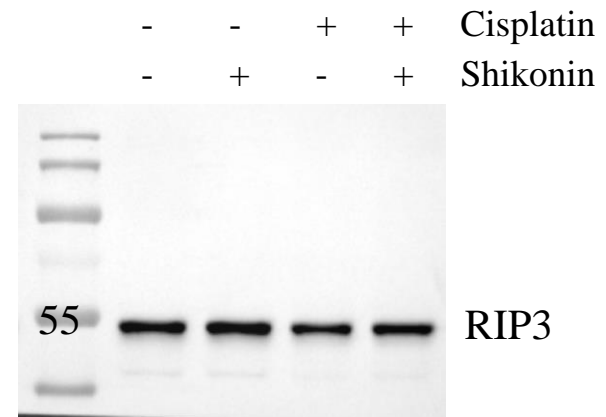

Figure 4 I

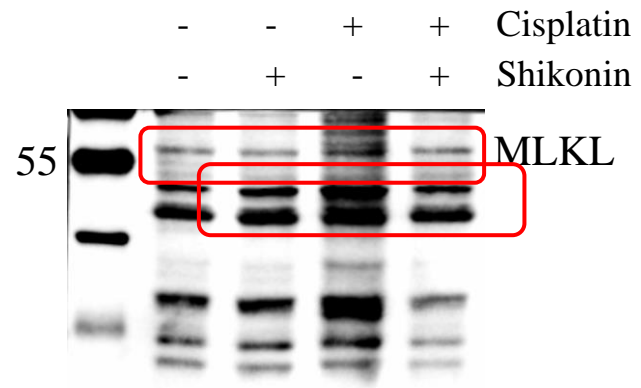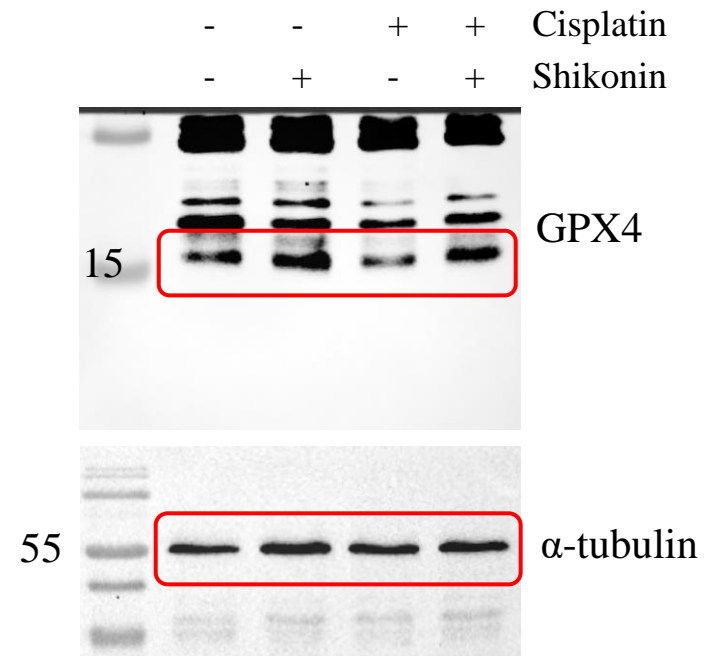



Figure 4 M

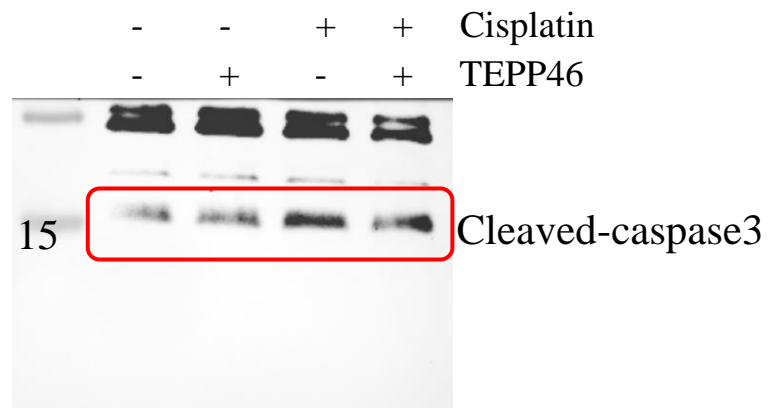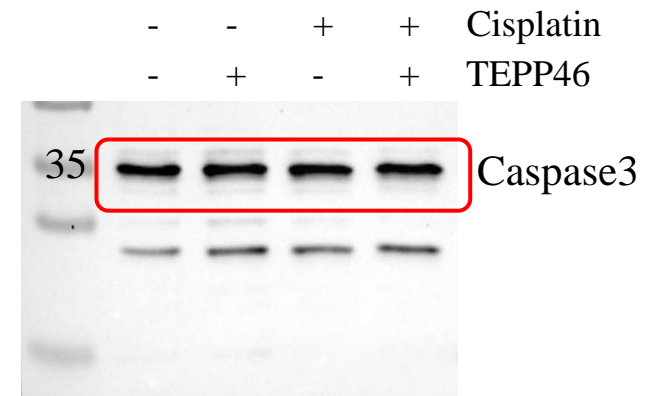

Figure 4 M

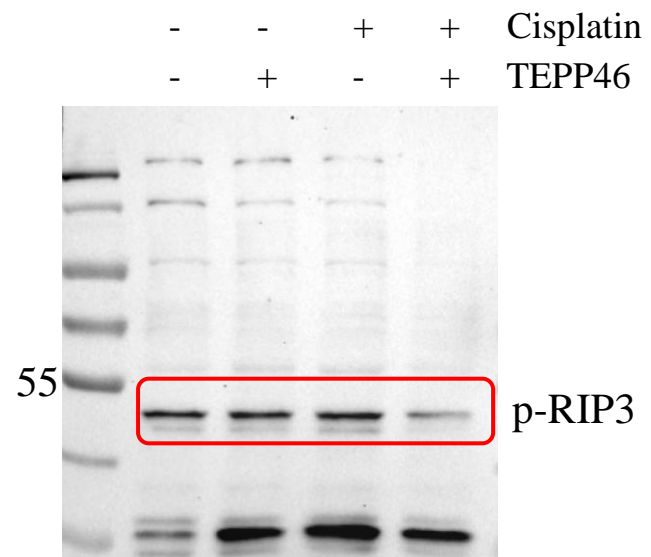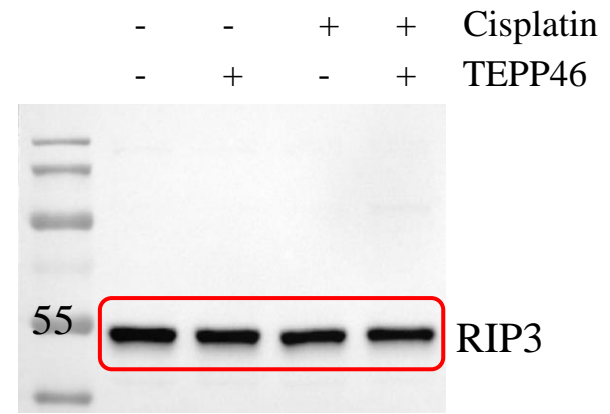

Figure 4 M

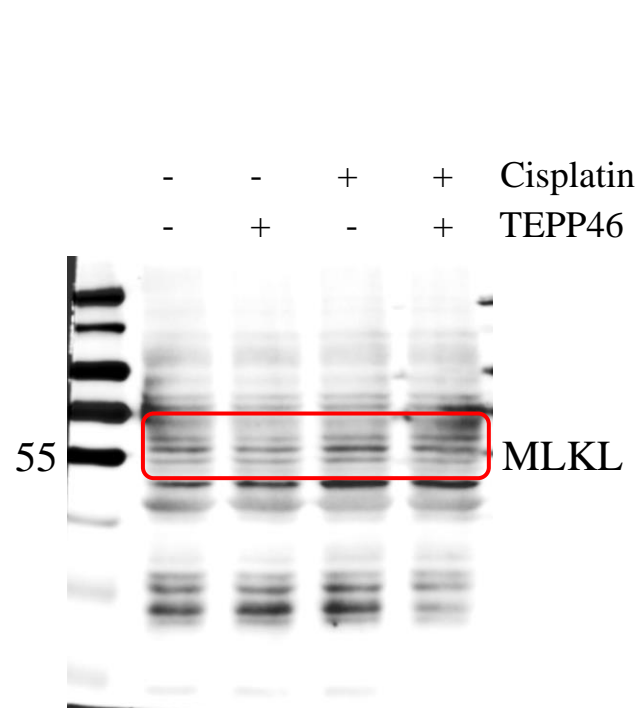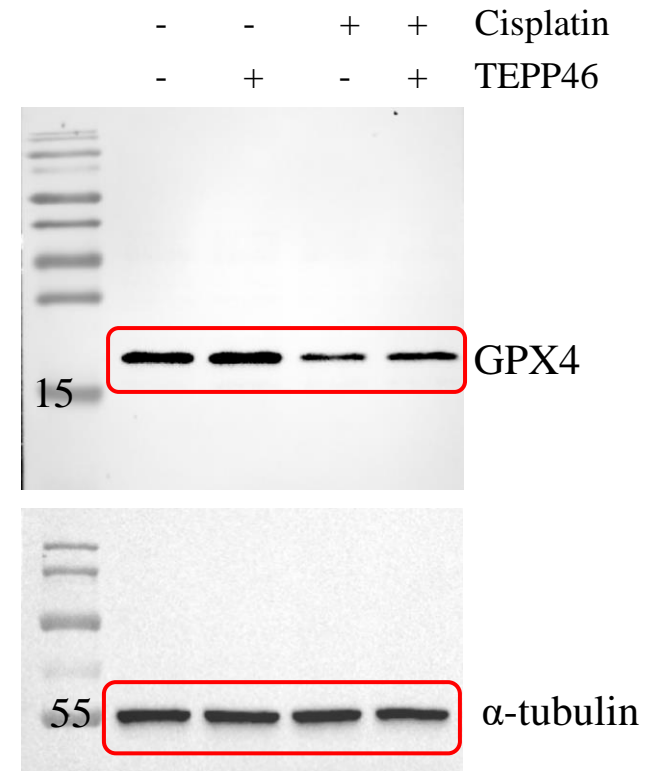



Figure 5 H

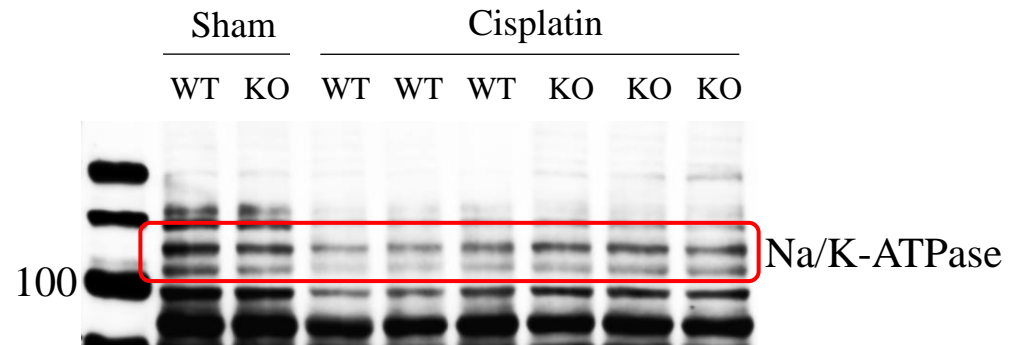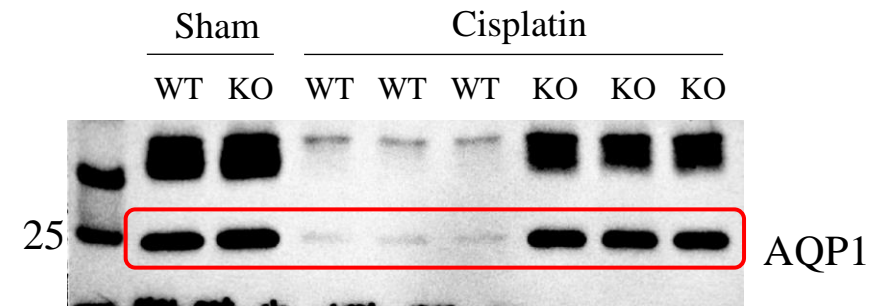

Figure 5 H

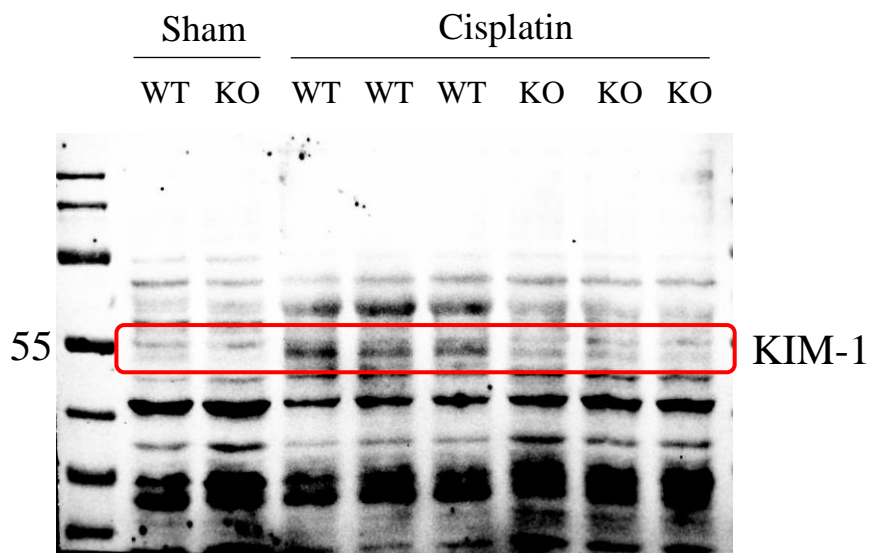

Figure 5 H

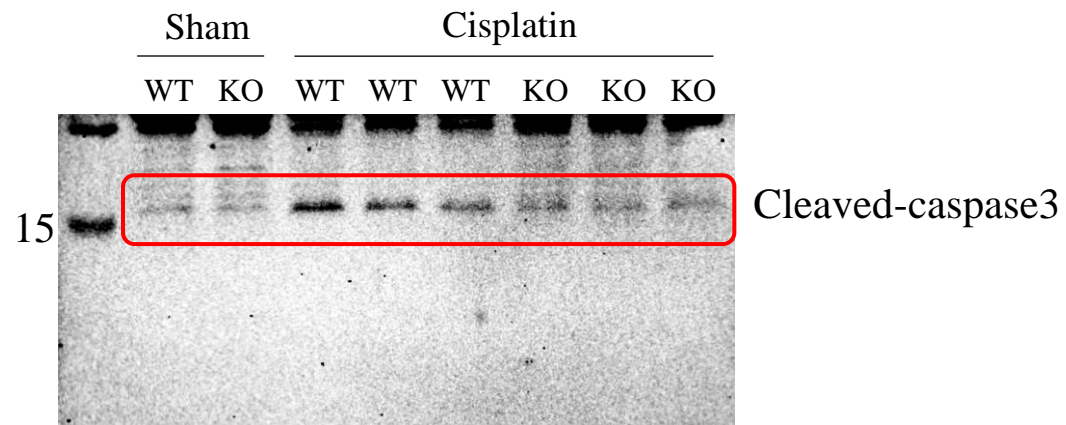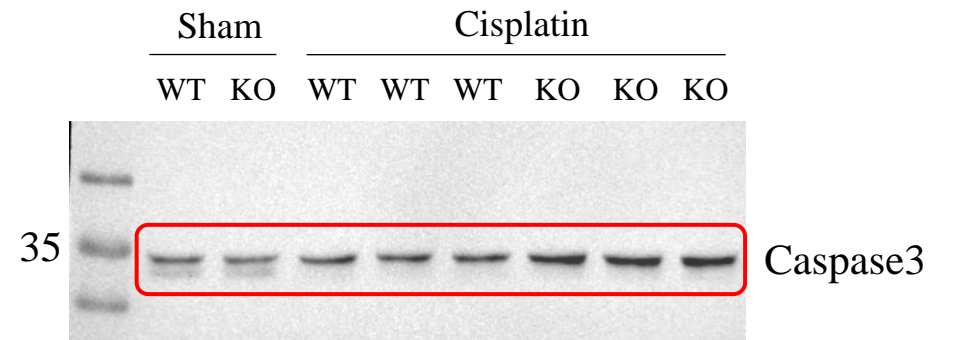

Figure 5 H

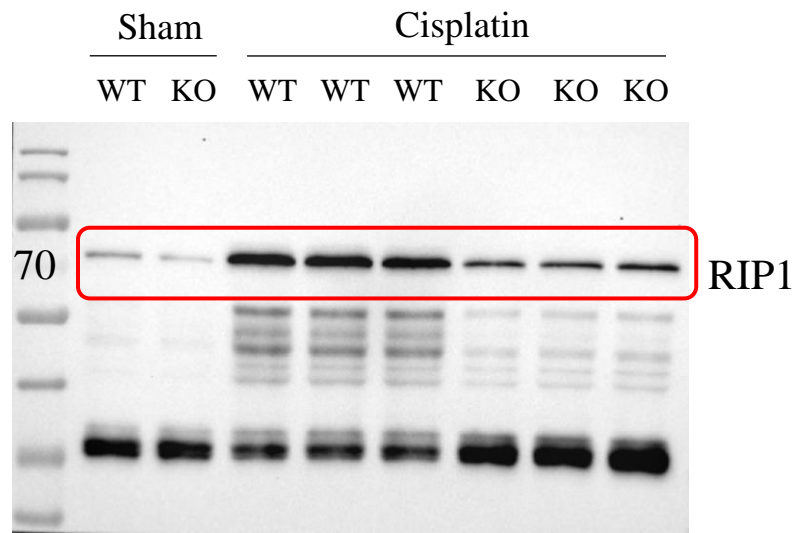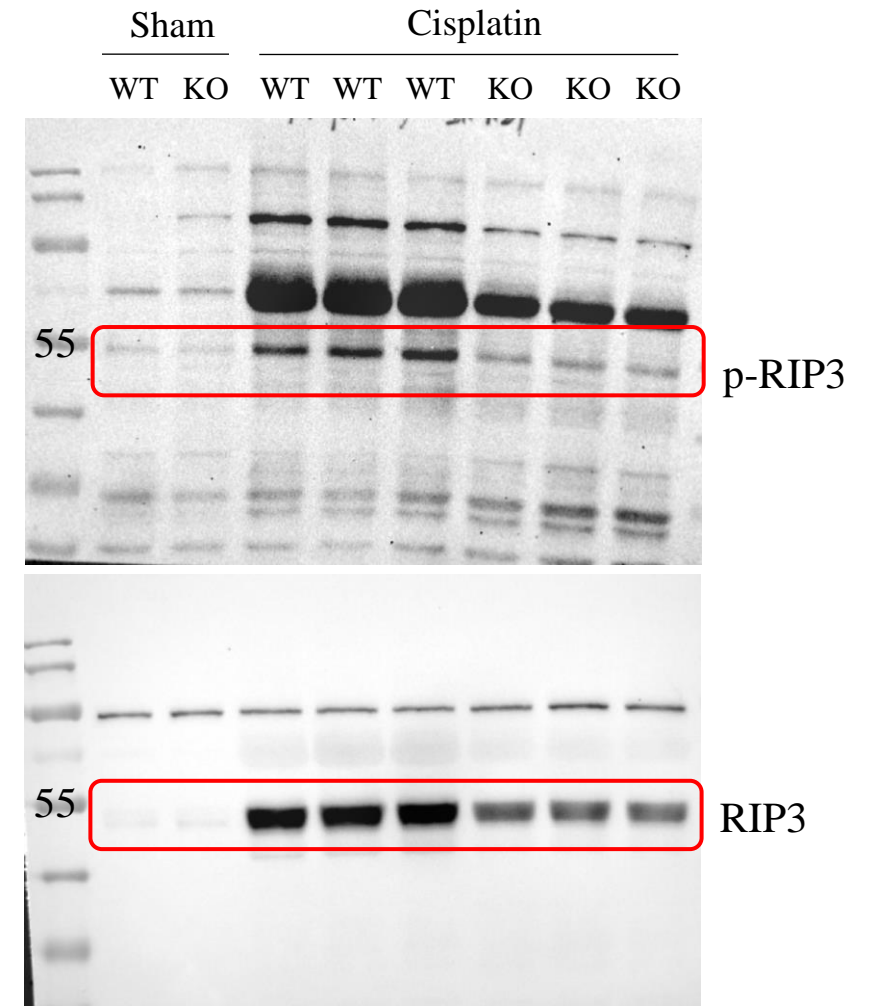



Figure 5 H

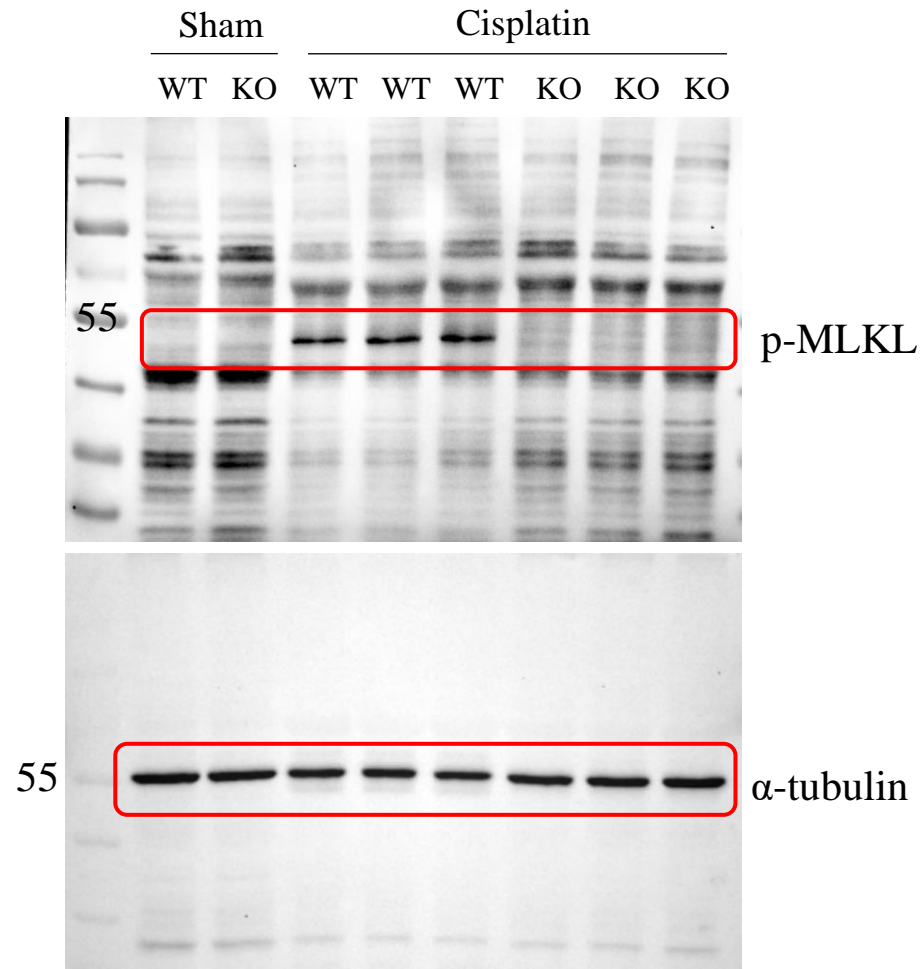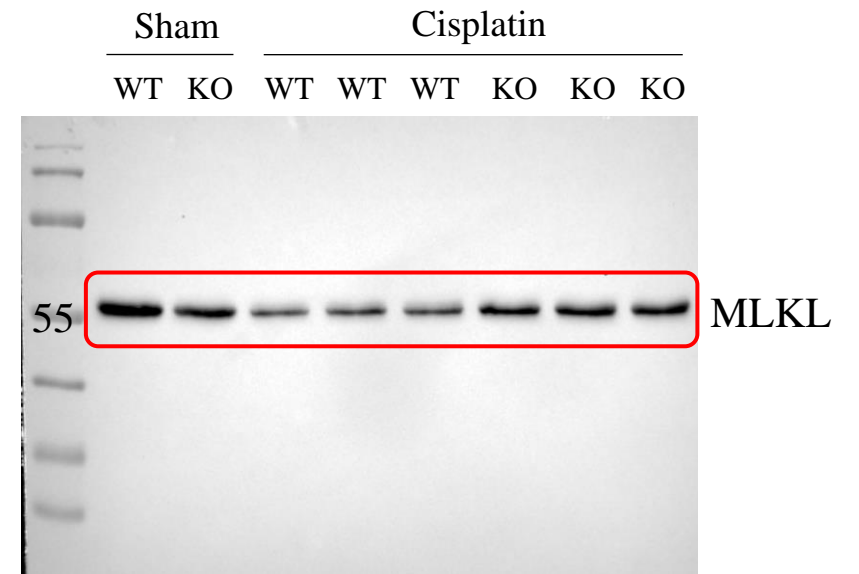

Figure 5 H

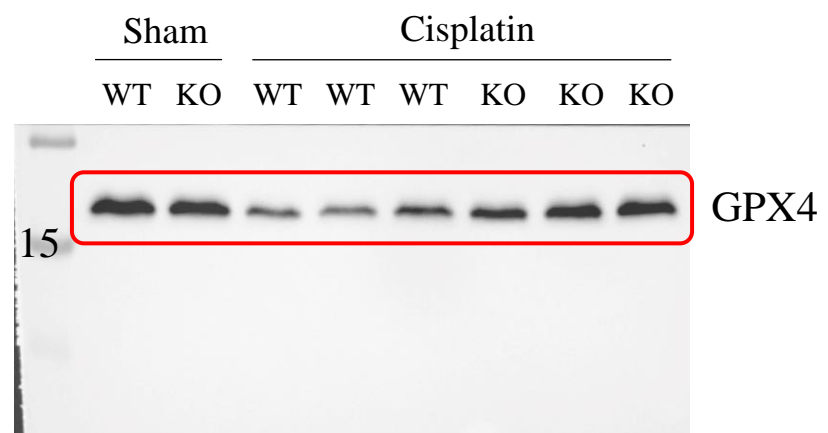

Figure 6 A

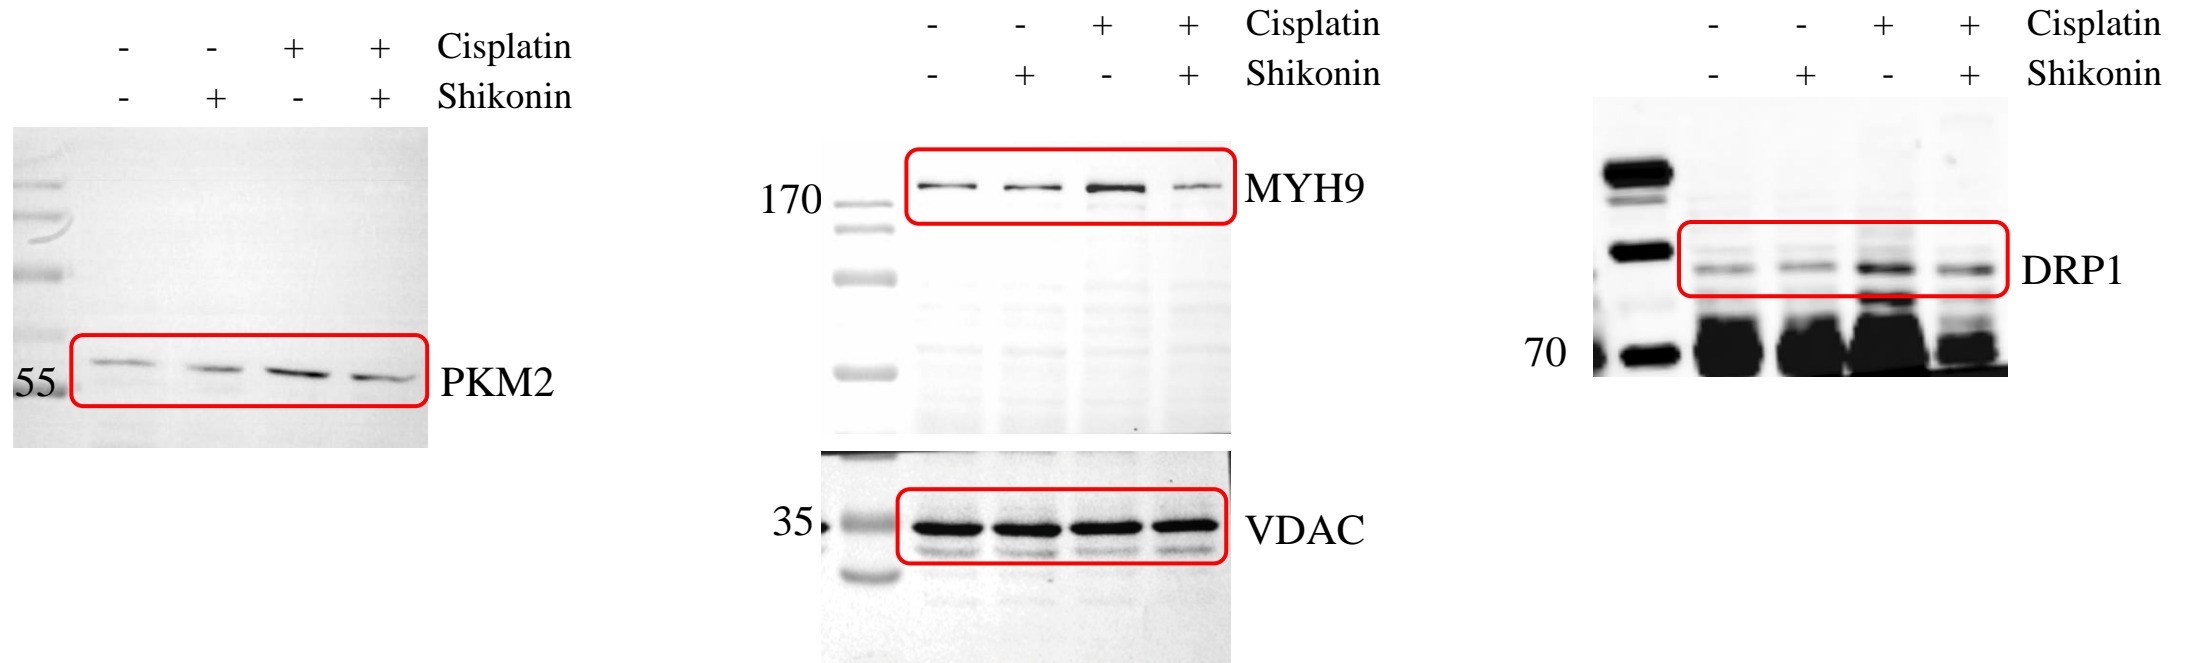

Figure 6 B

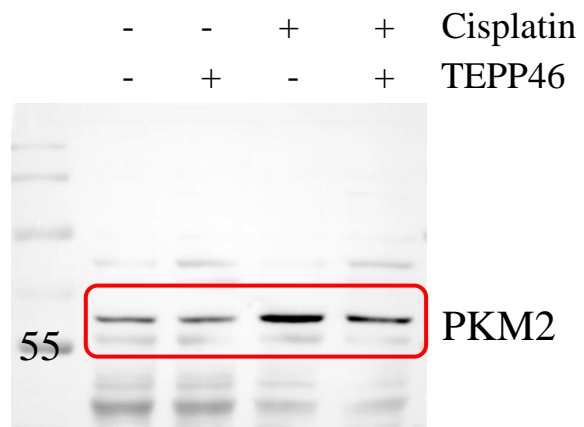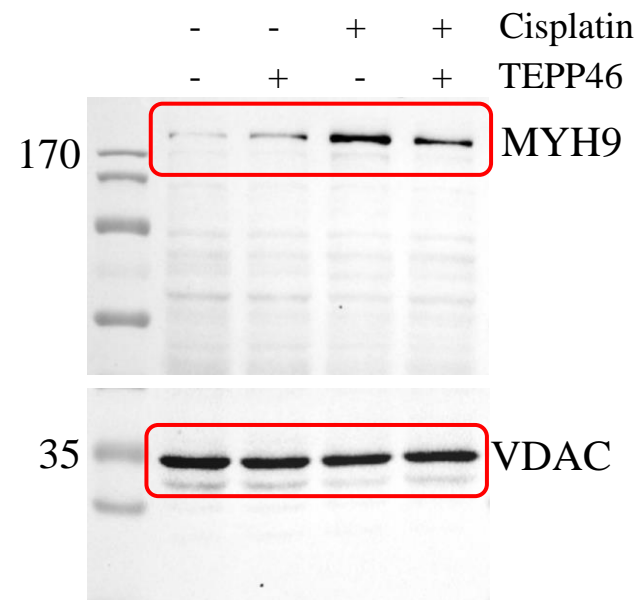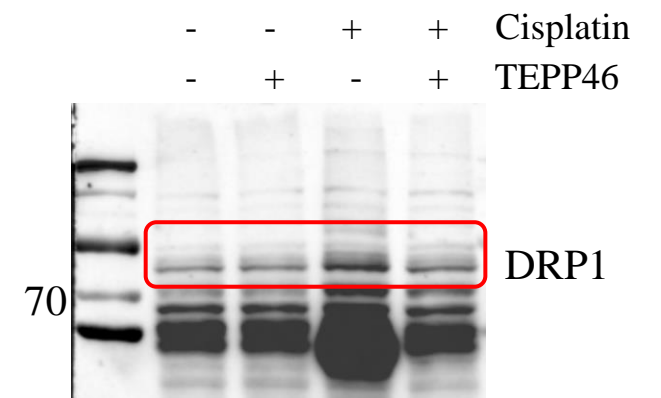

Figure 6 I

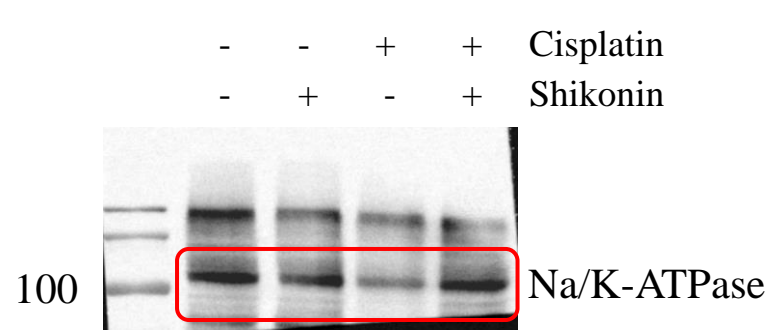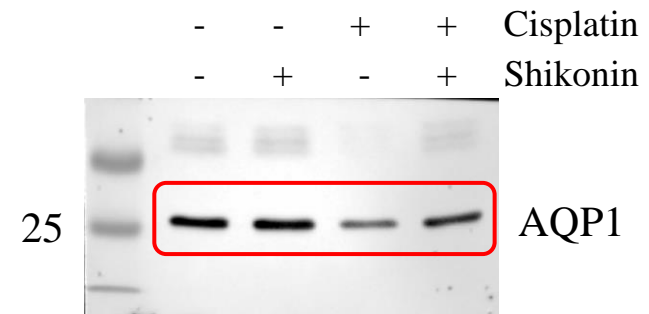

Figure 6 I

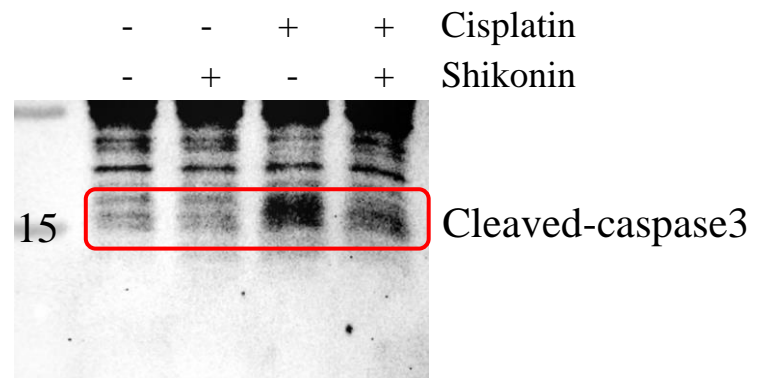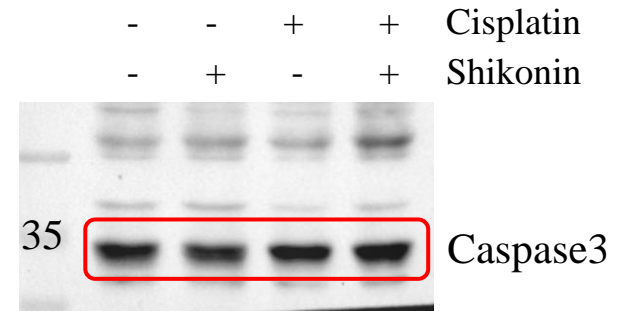

Figure 6 I

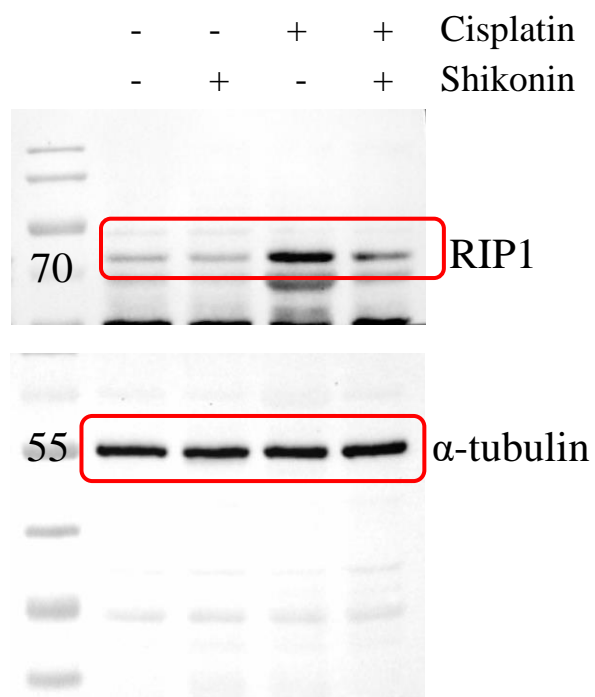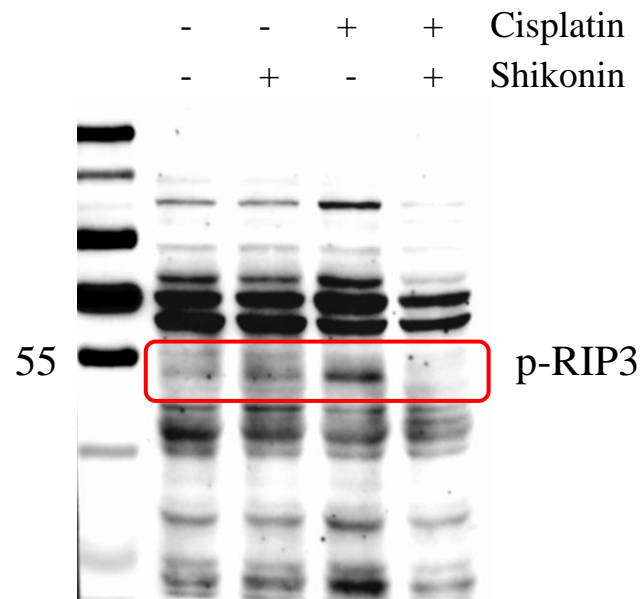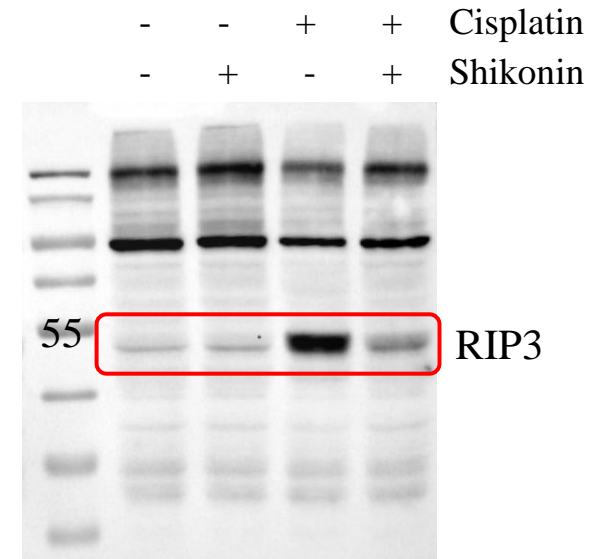

Figure 6 I

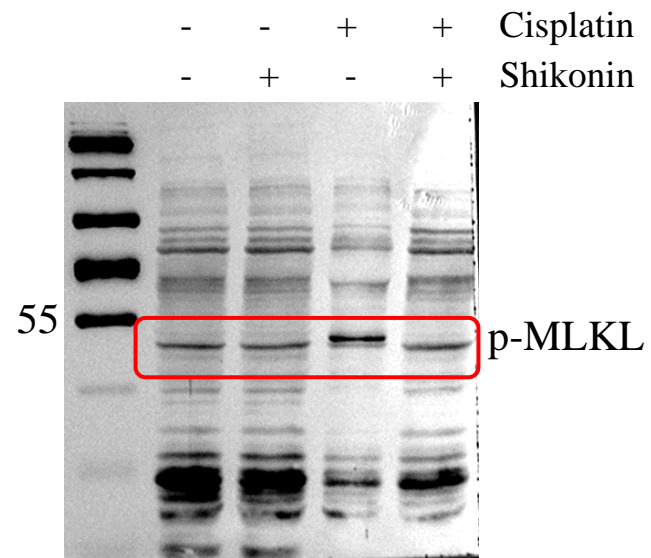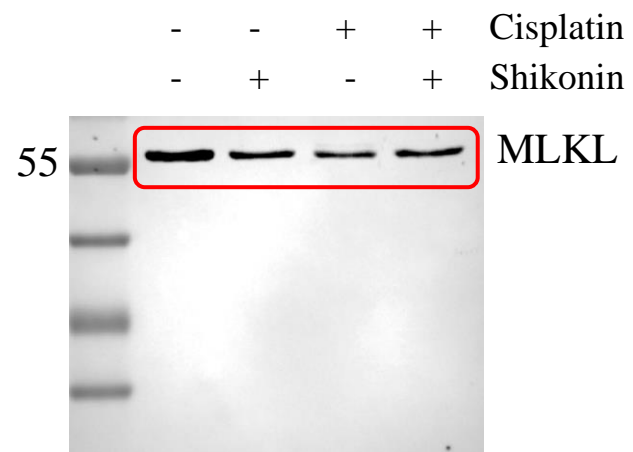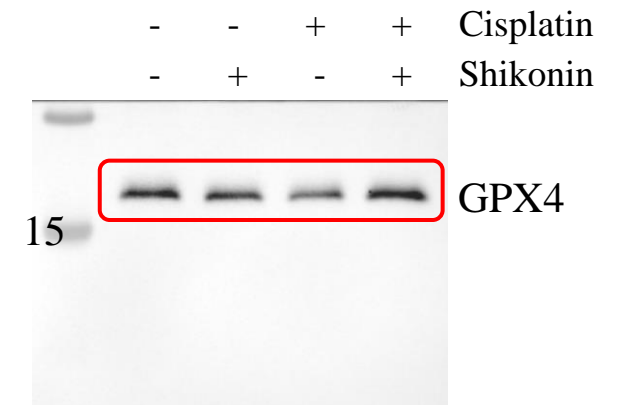



Figure 6 J

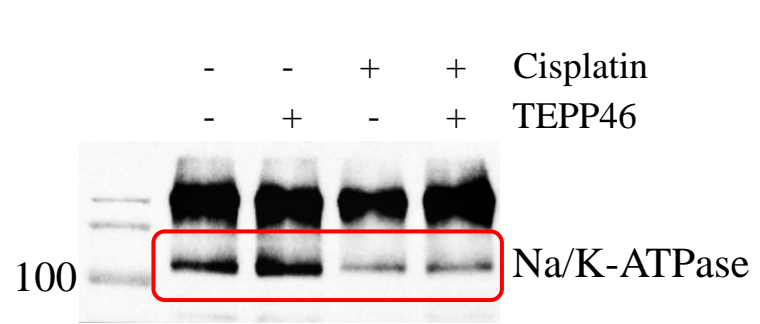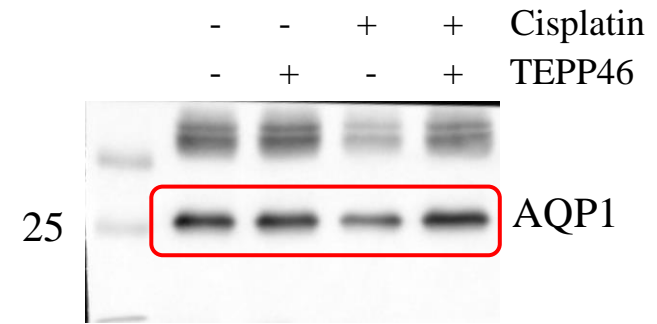

Figure 6 J

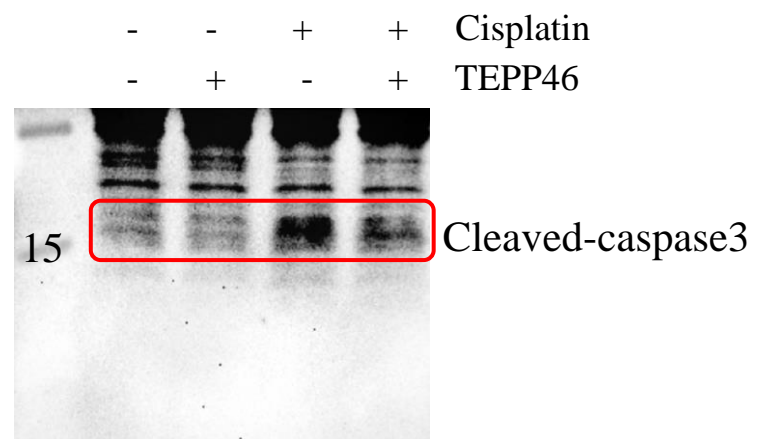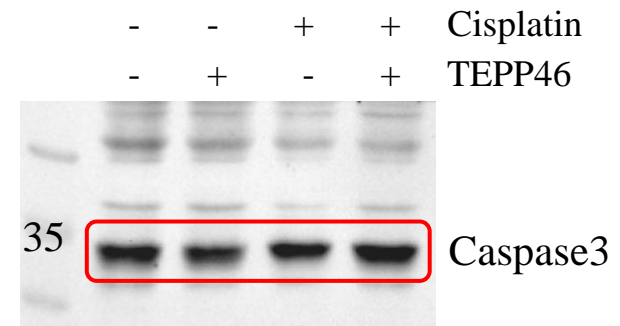

Figure 6 J

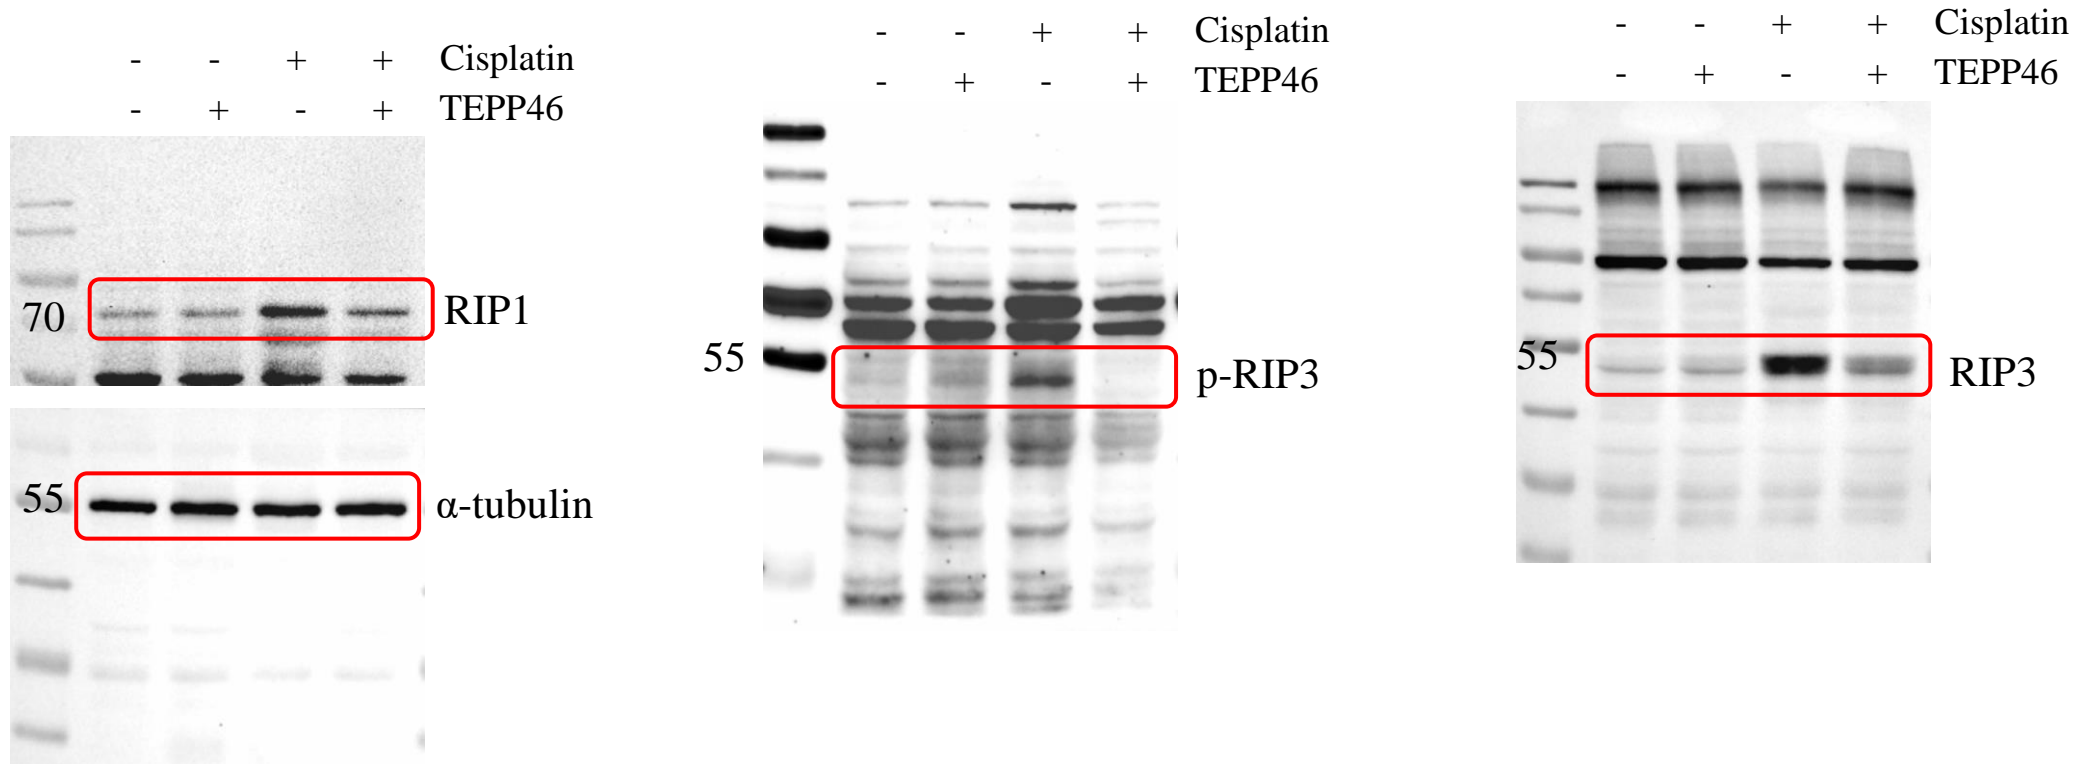

Figure 6 J

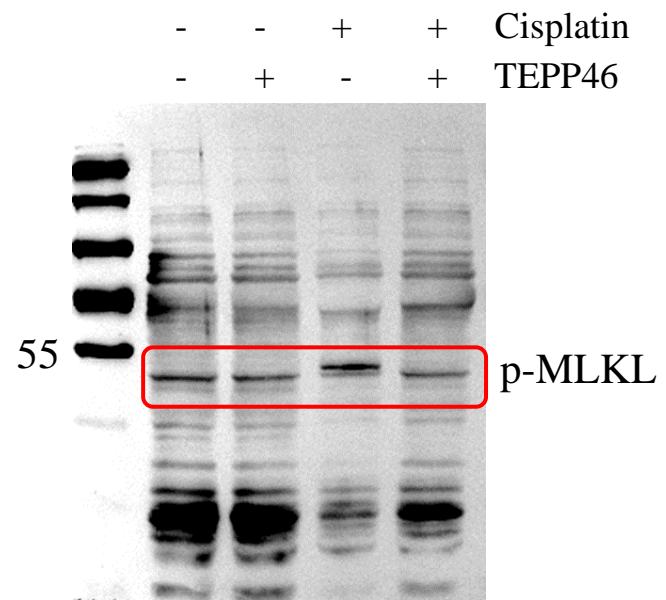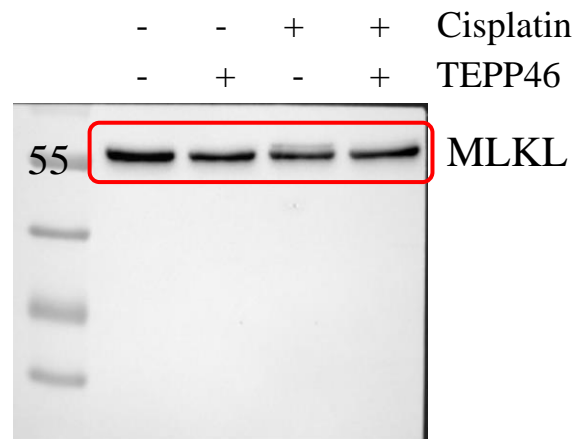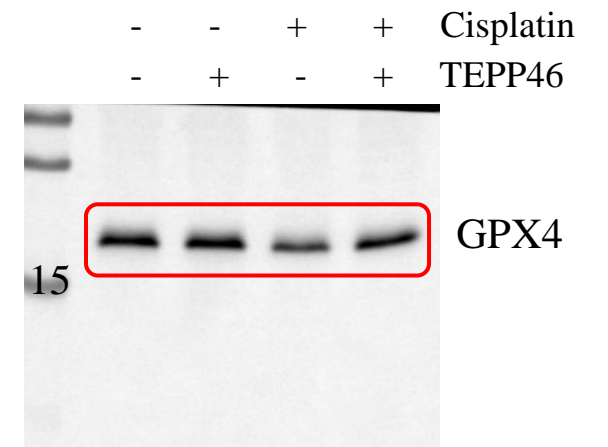

Supplementary Figure 1 A-B

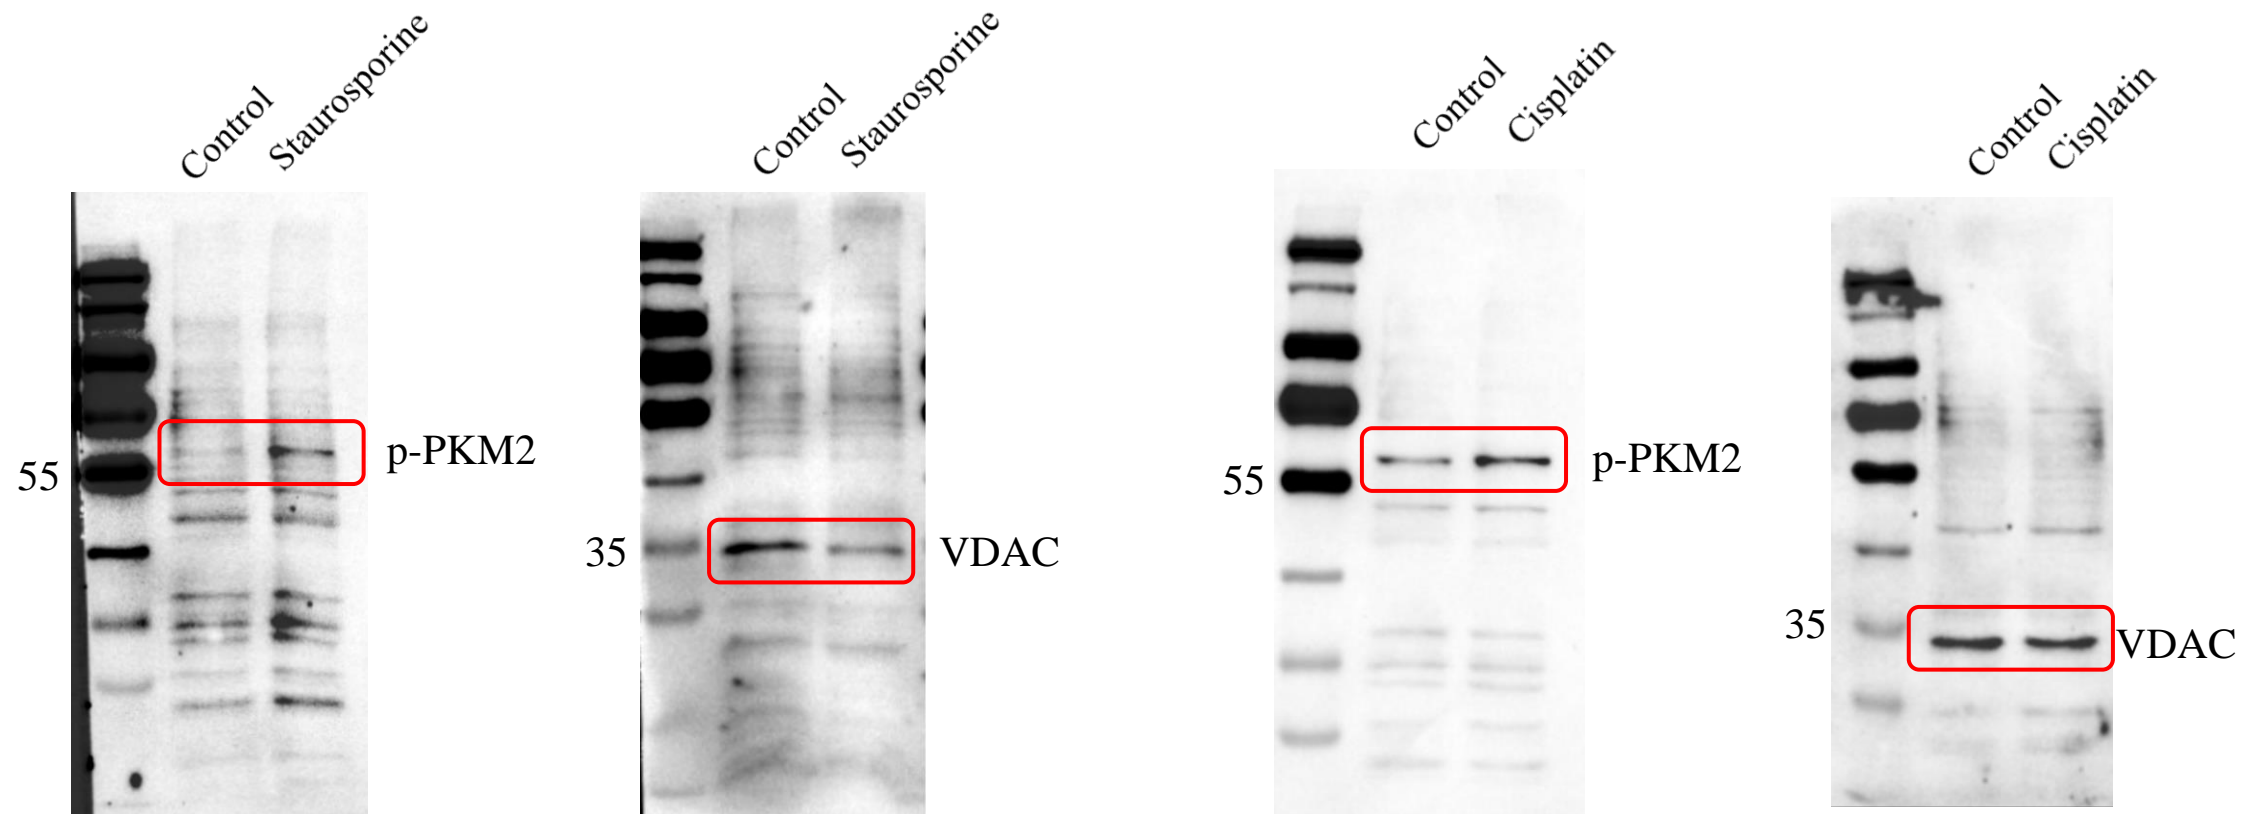

Supplementary Figure 1 C

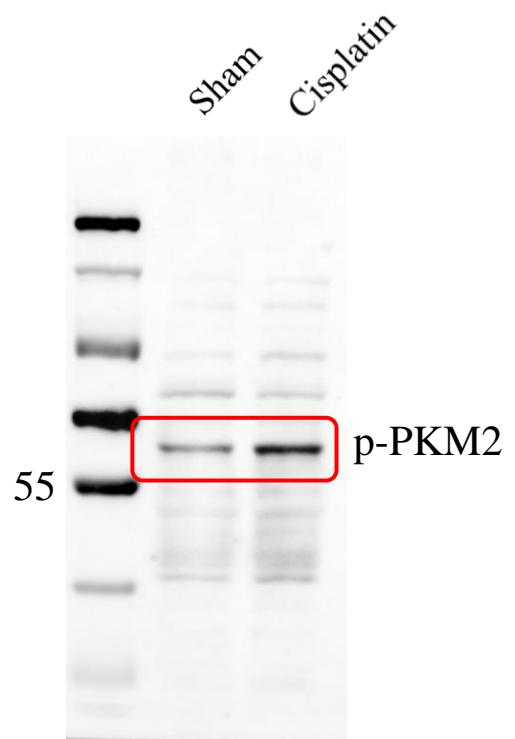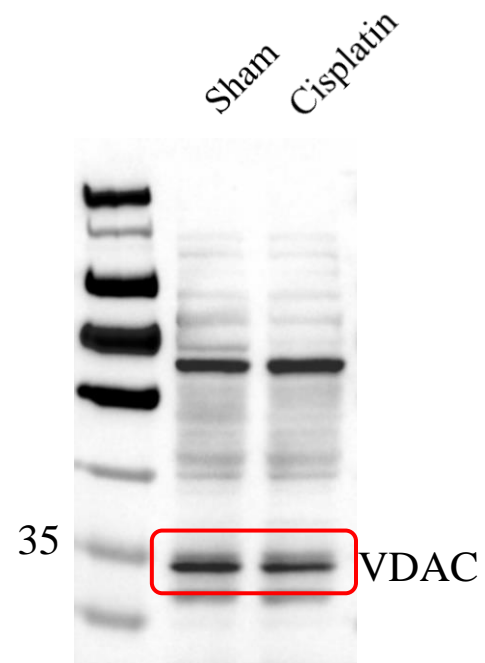

Supplementary Figure 1 D

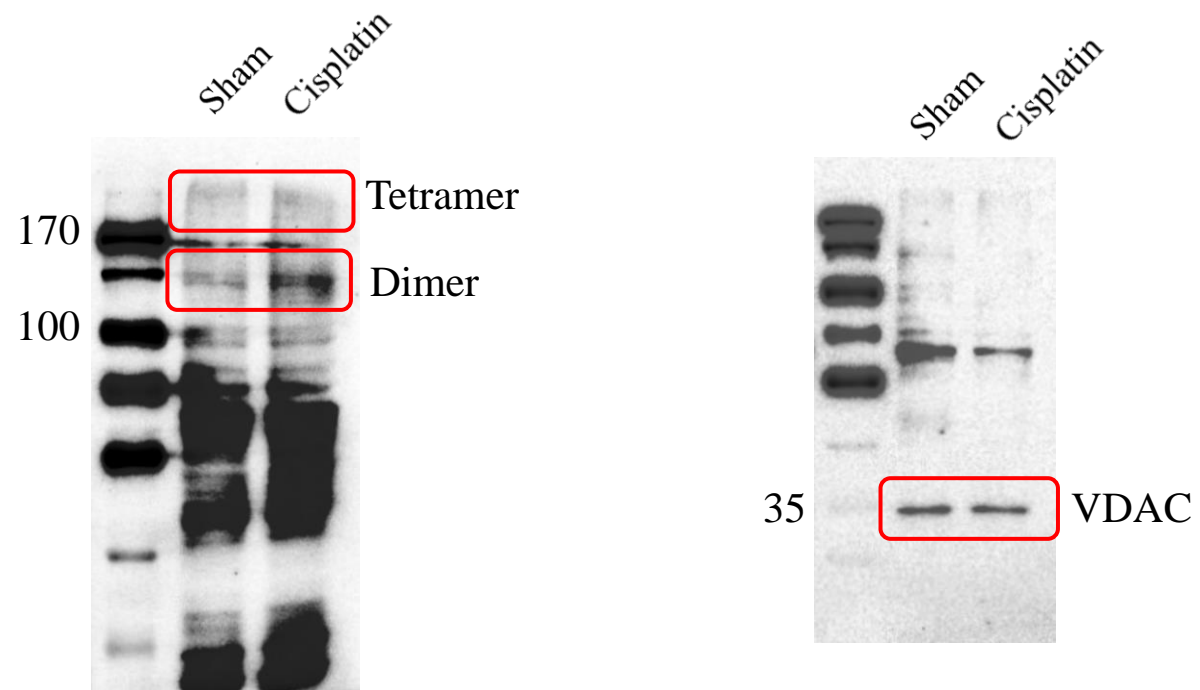

# Supplementary Figure 2 A

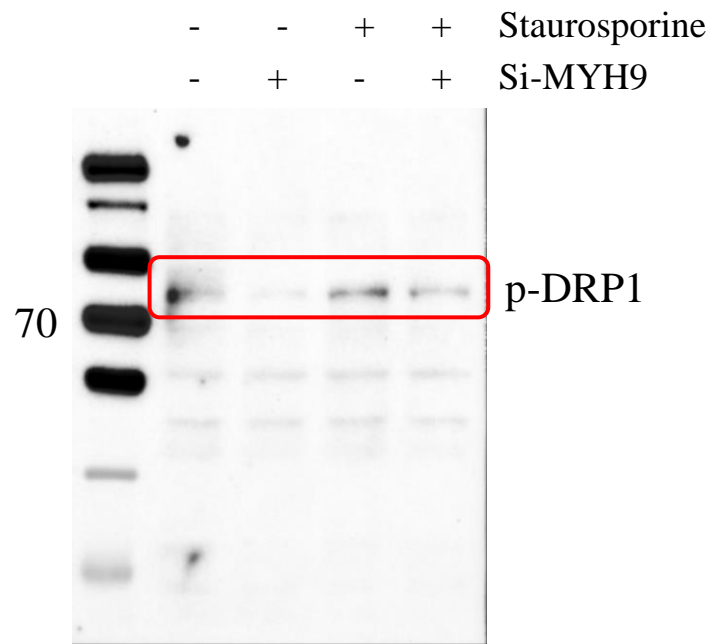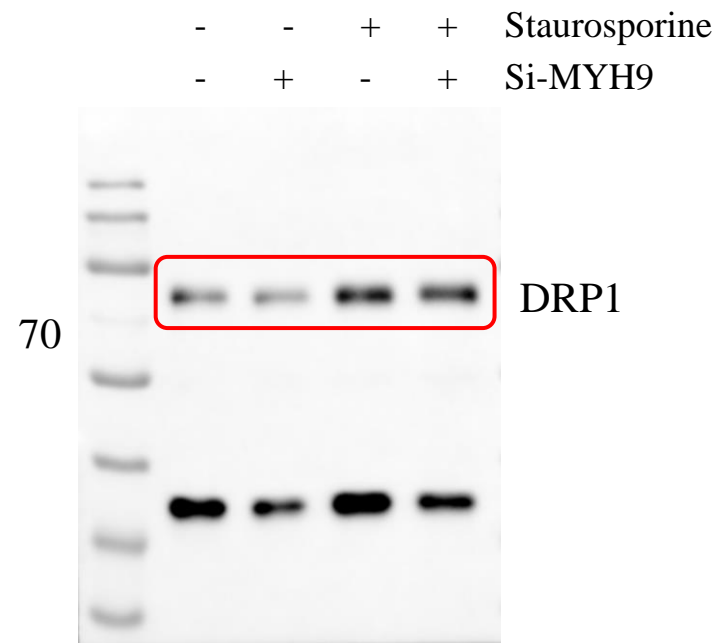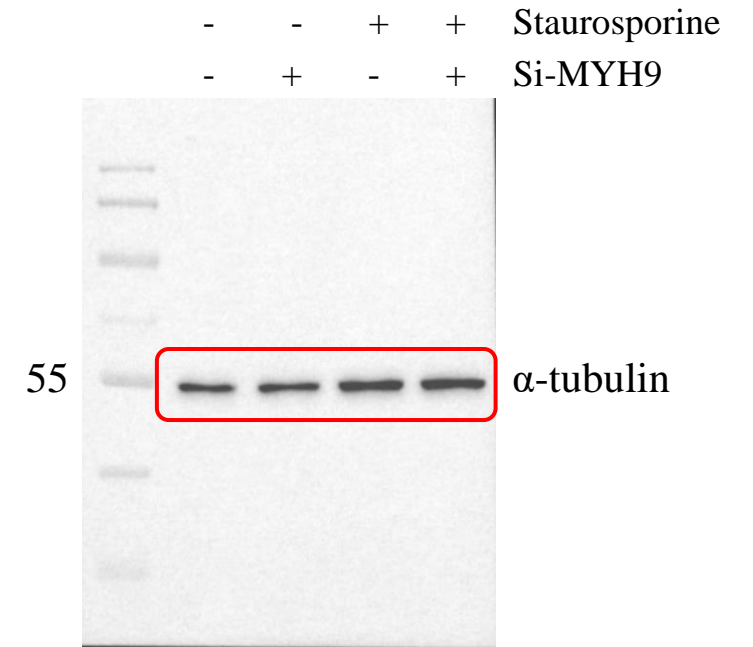



Supplementary Figure 2 D

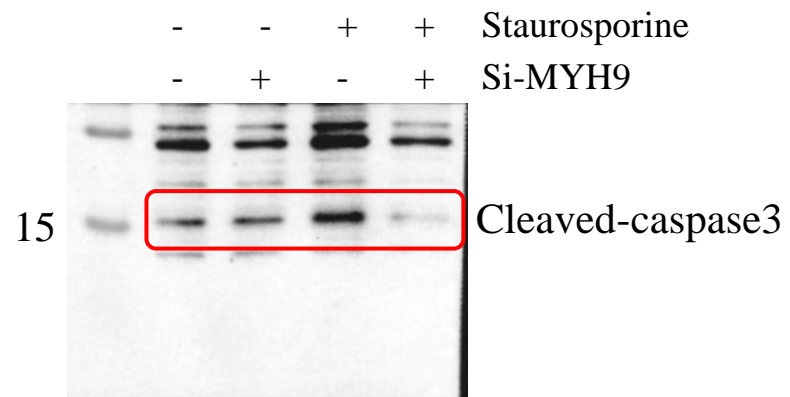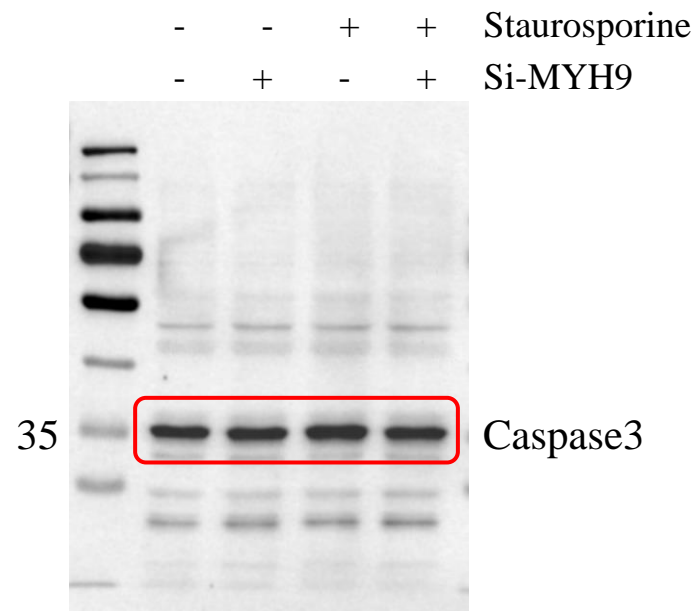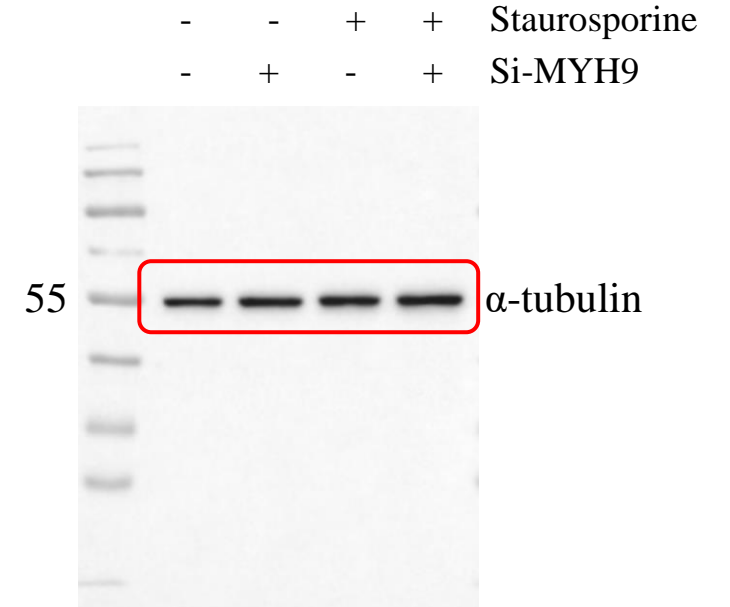

Supplementary Figure 2 D

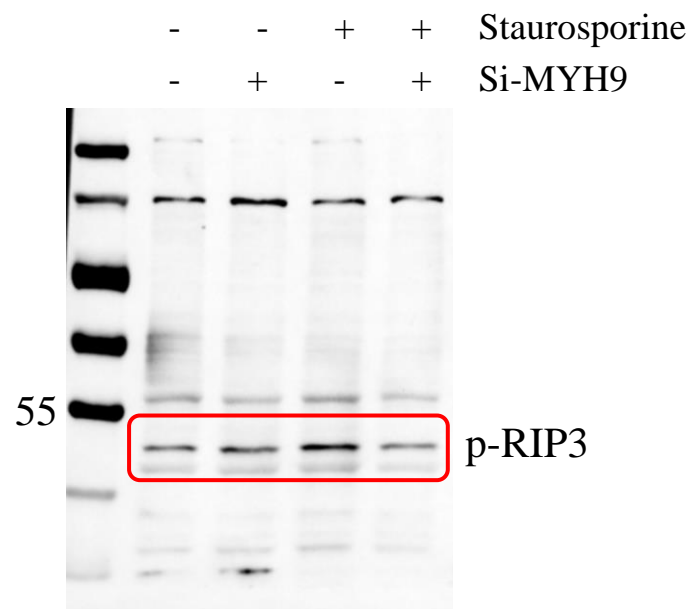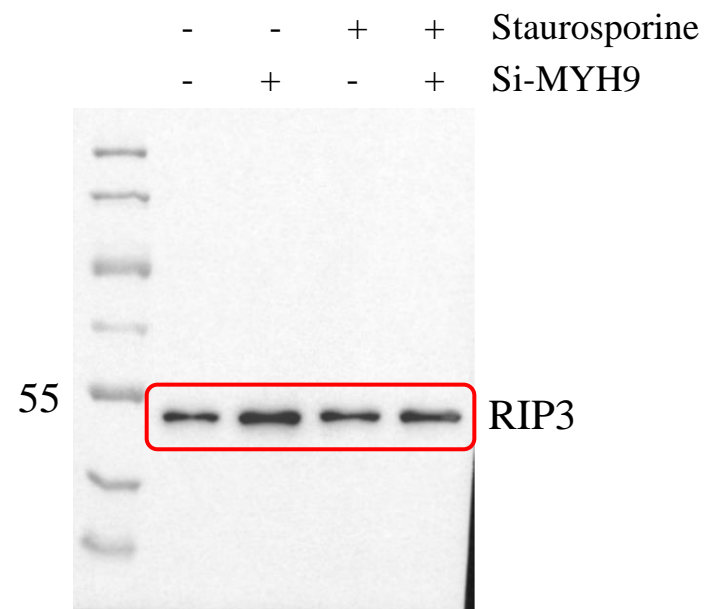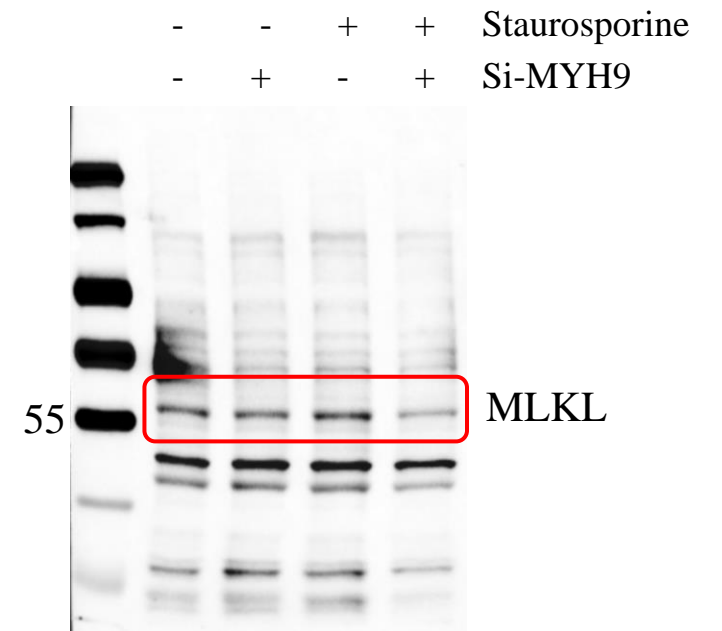

Supplementary Figure 2 G

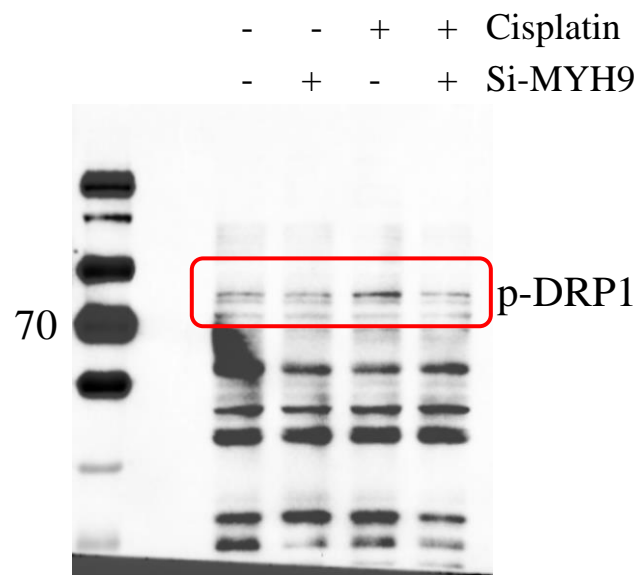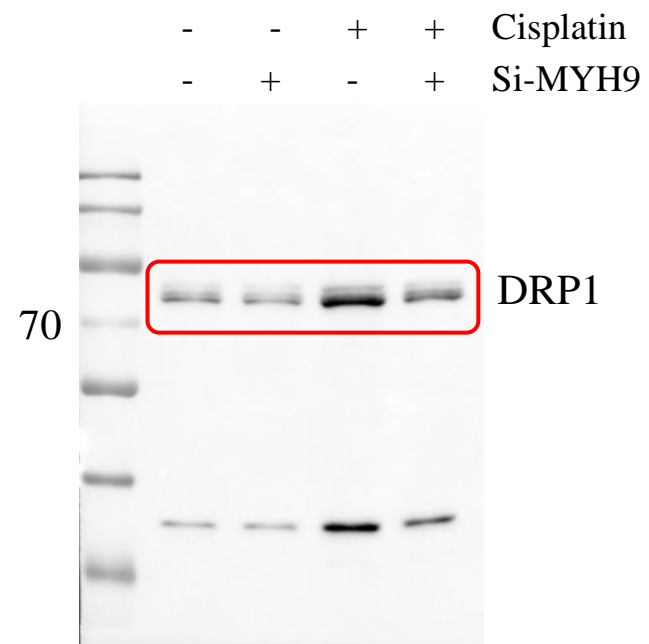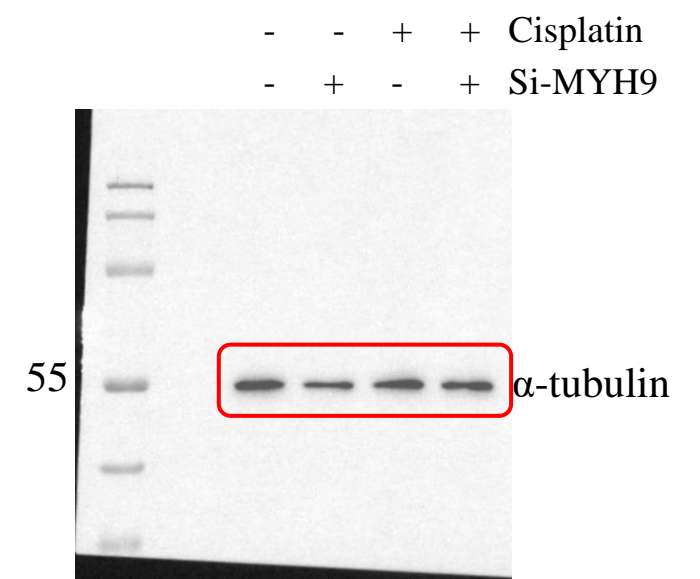

Supplementary Figure 2 J

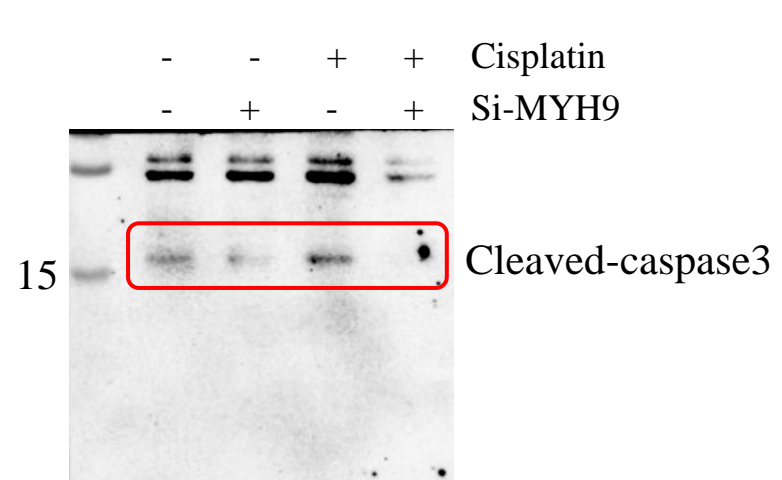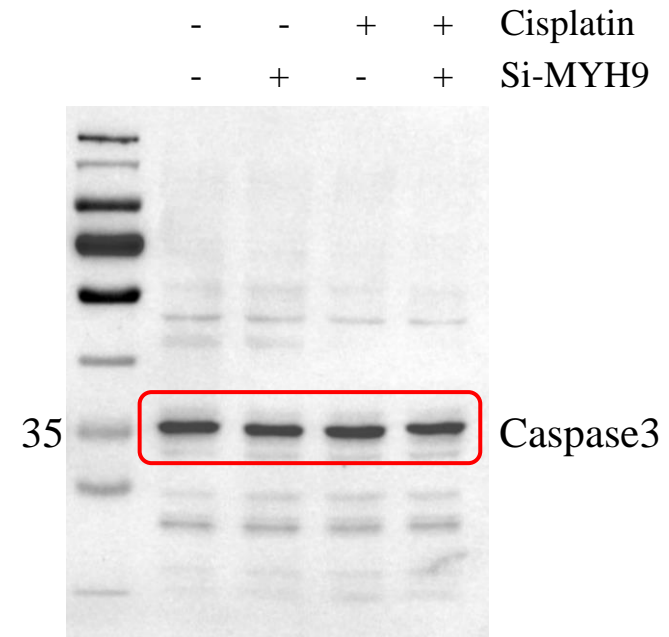

Supplementary Figure 2 J

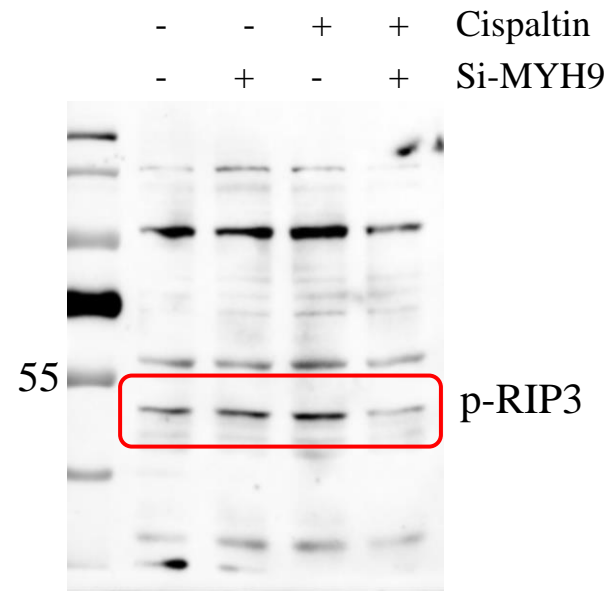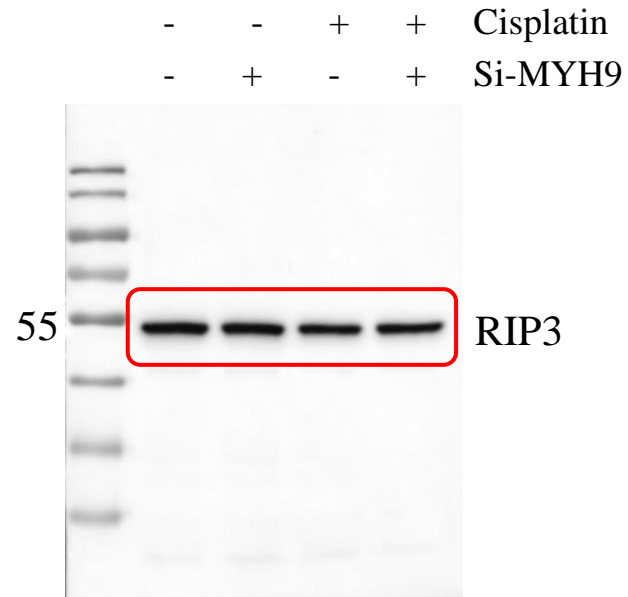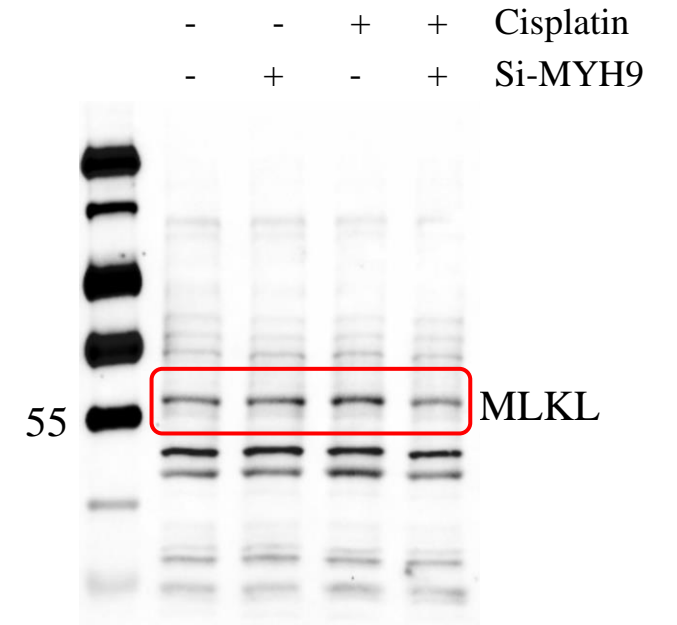

## Supplementary Figure 2 J

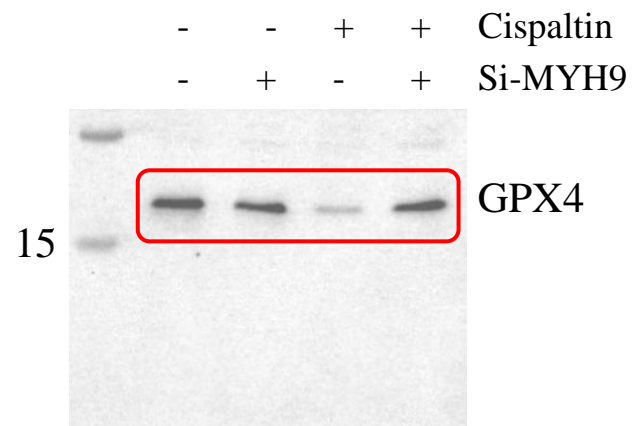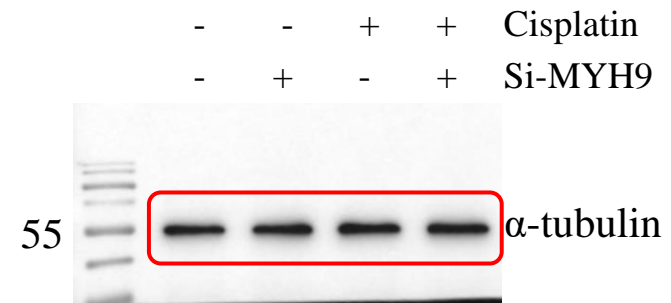

Supplementary Figure 3 A

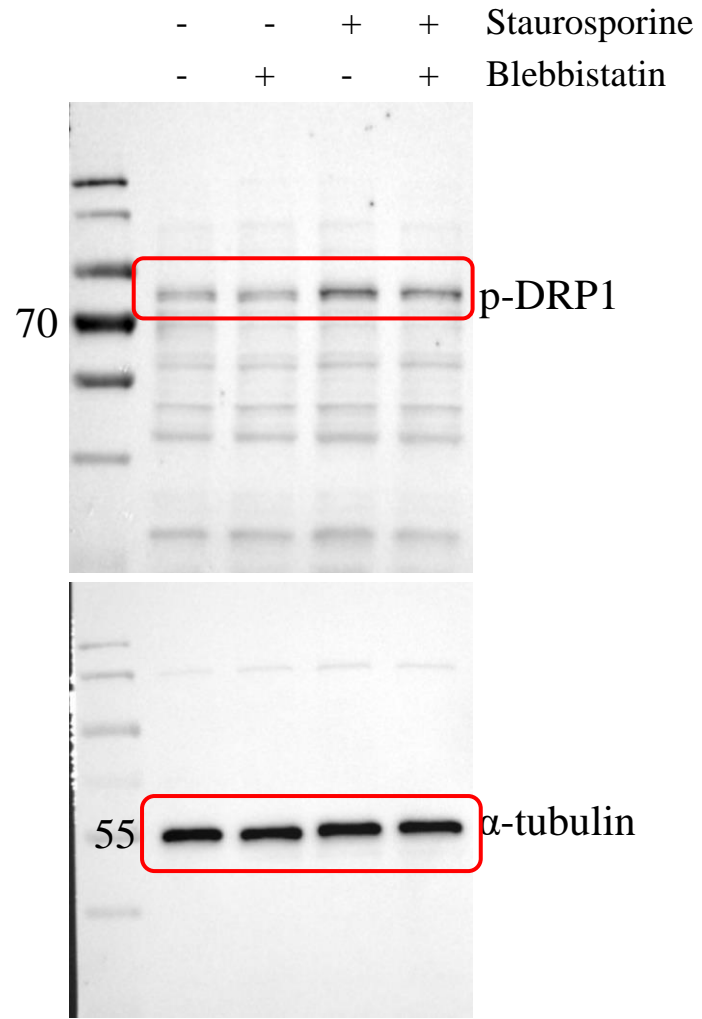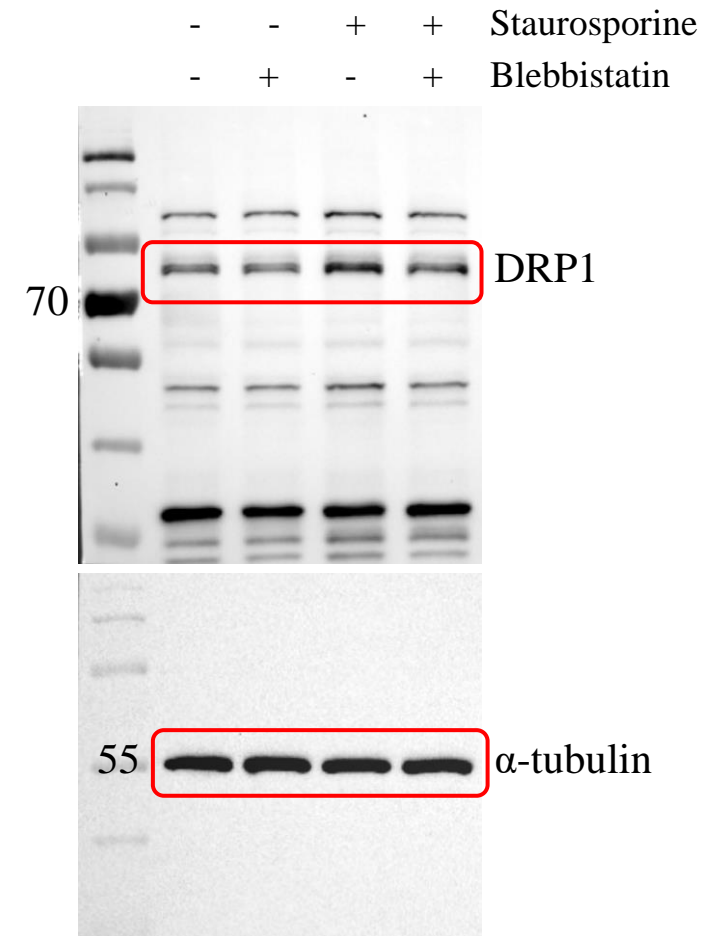

# Supplementary Figure 3 D

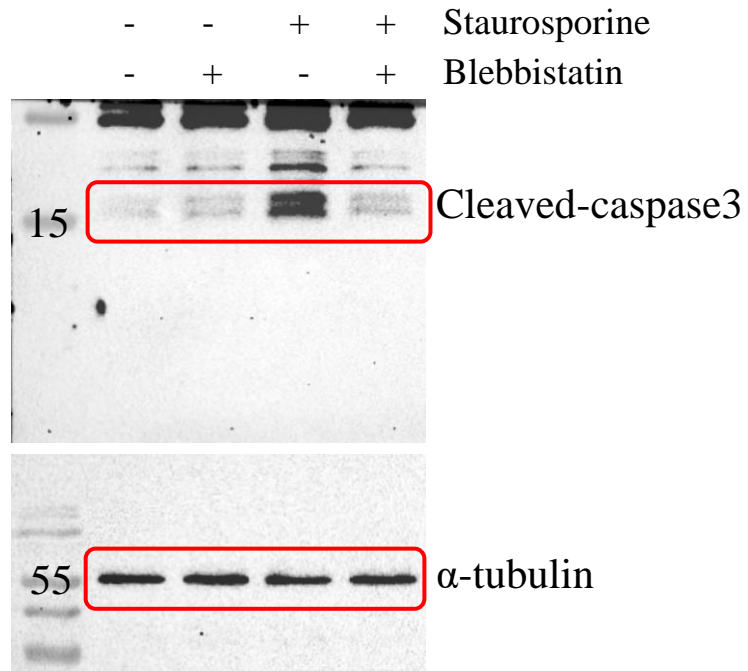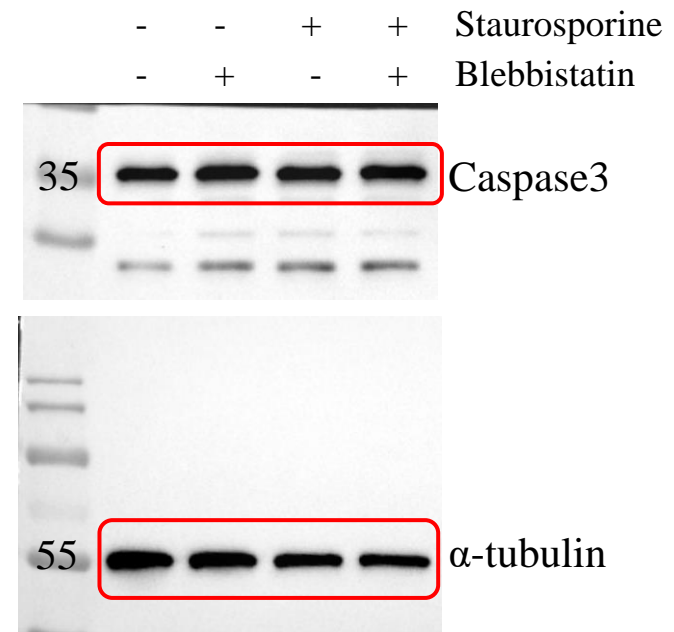



# Supplementary Figure 3 D

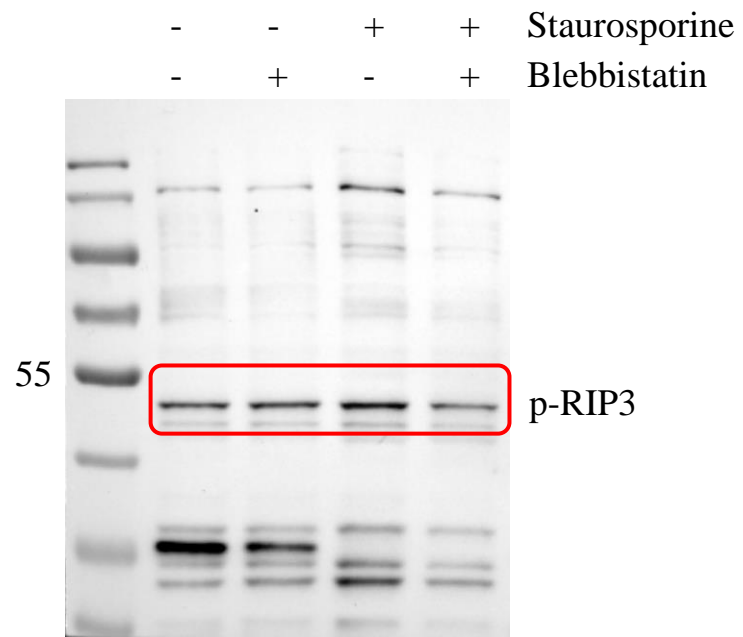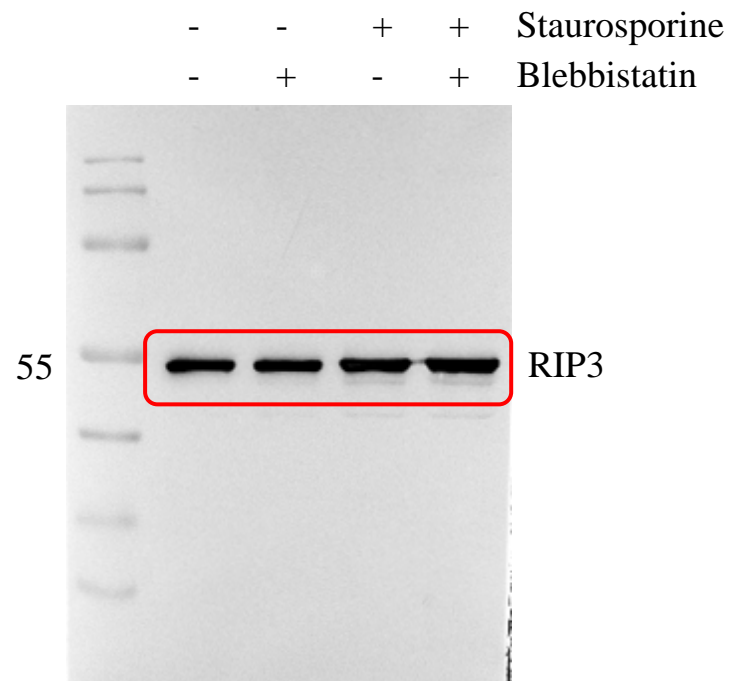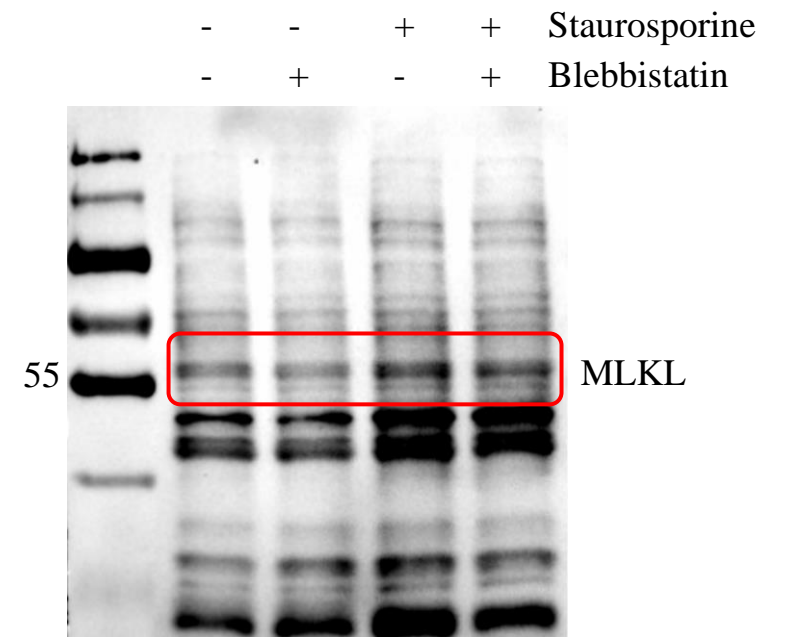

# Supplementary Figure 3 G

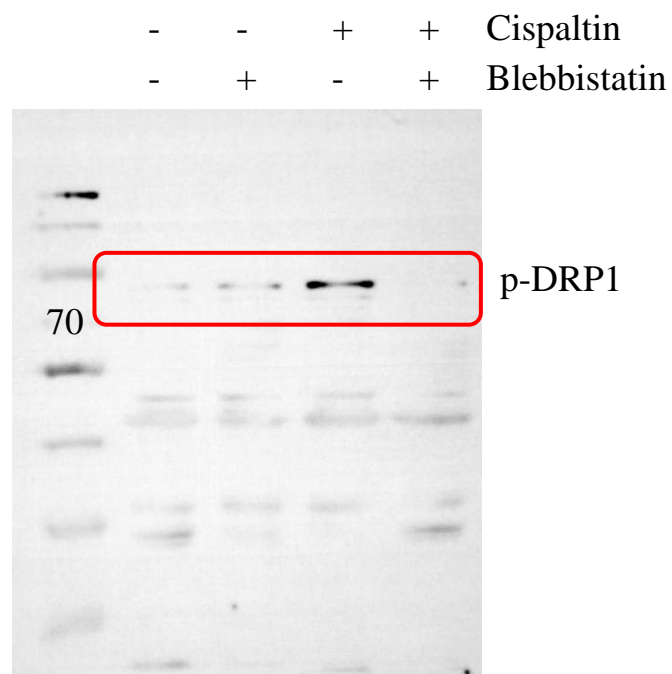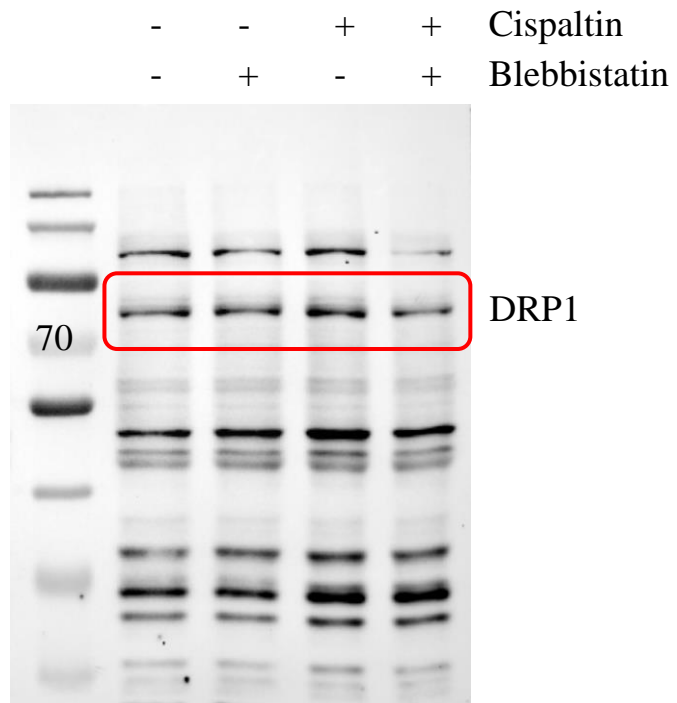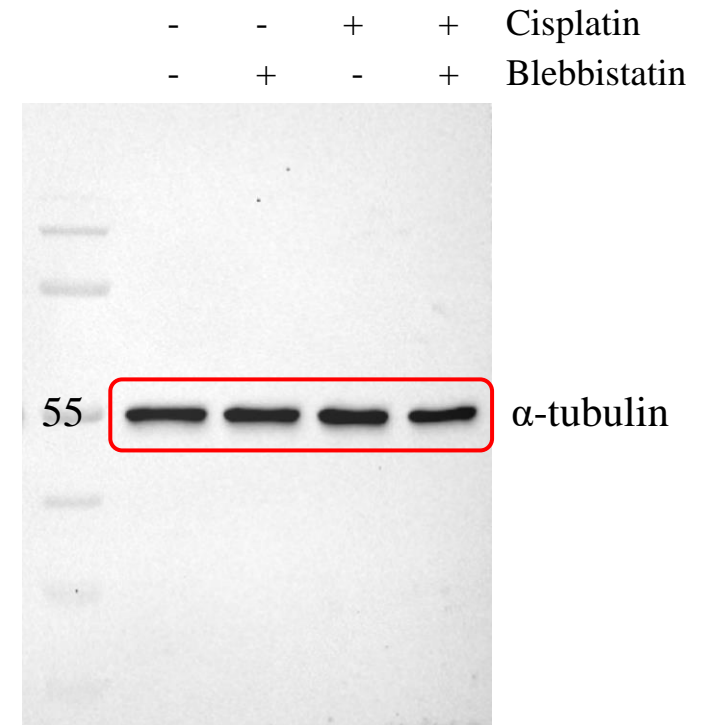

# Supplementary Figure 3 J

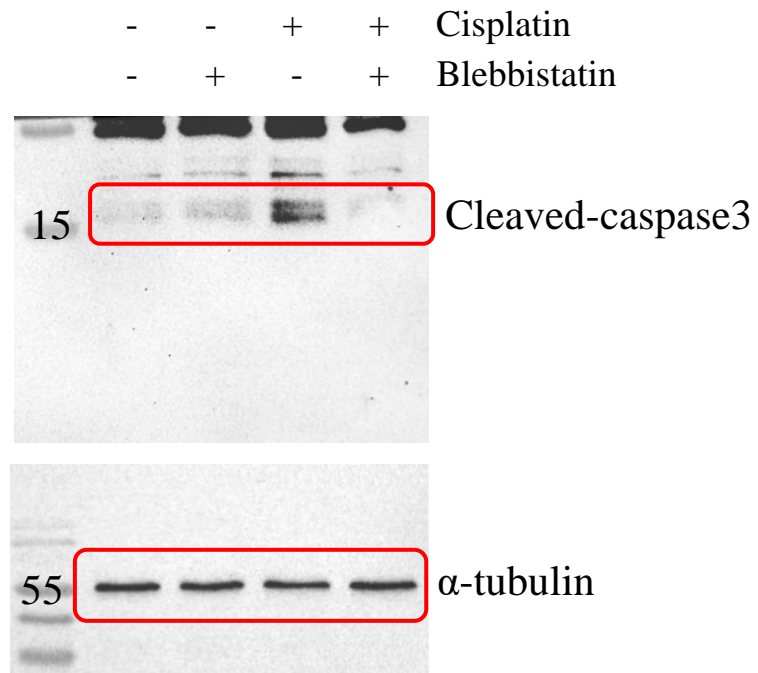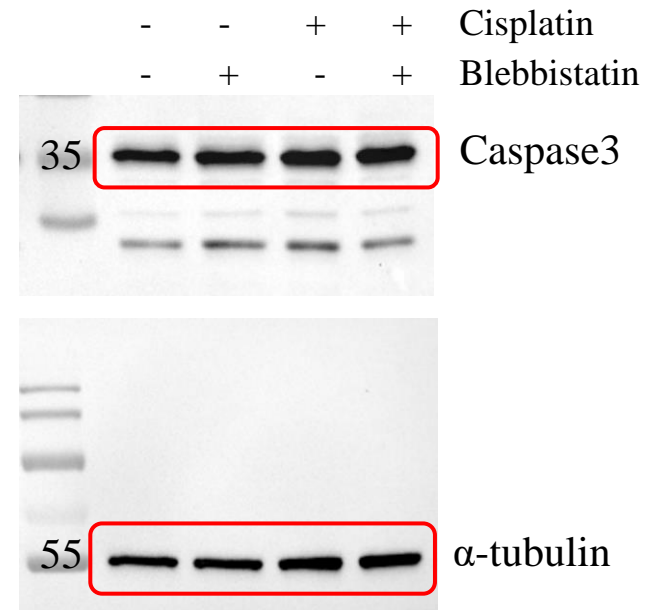

Supplementary Figure 3 J

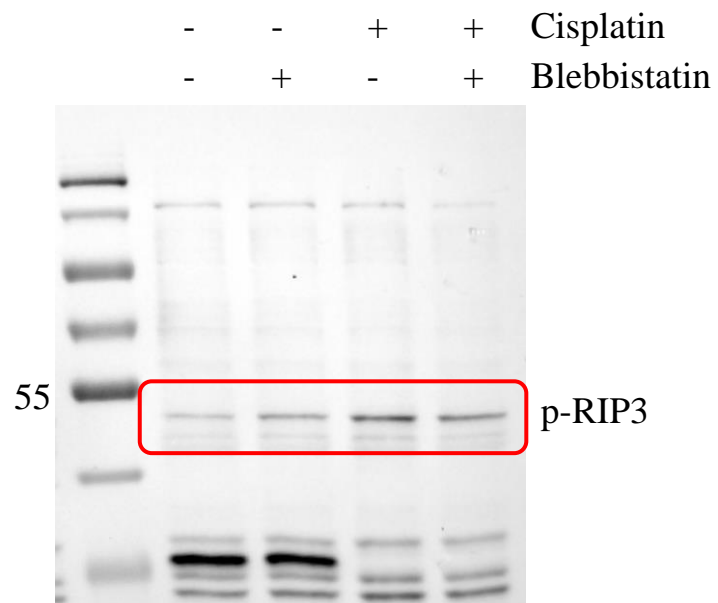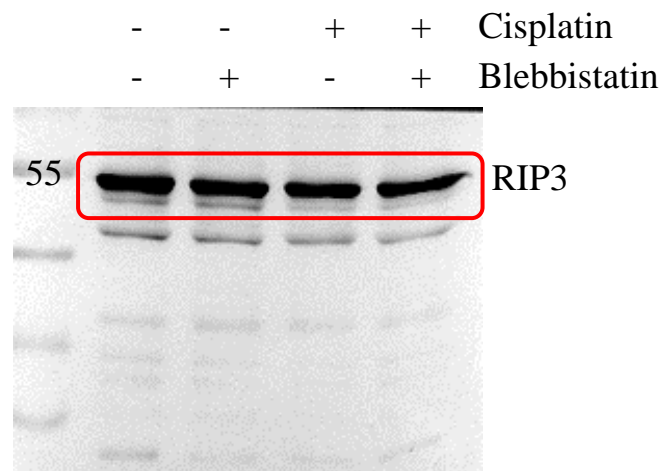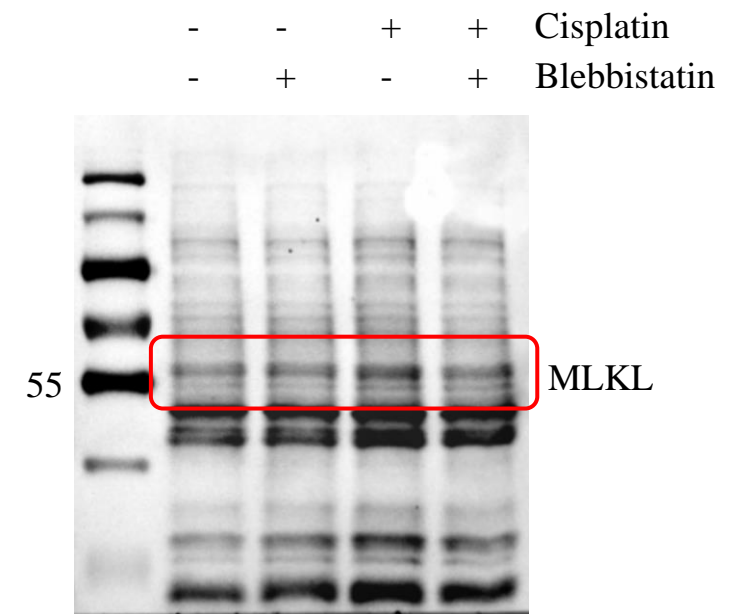

# Supplementary Figure 3 J

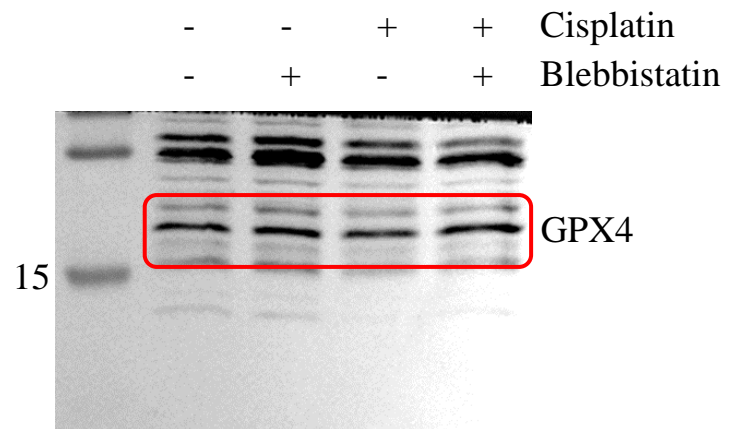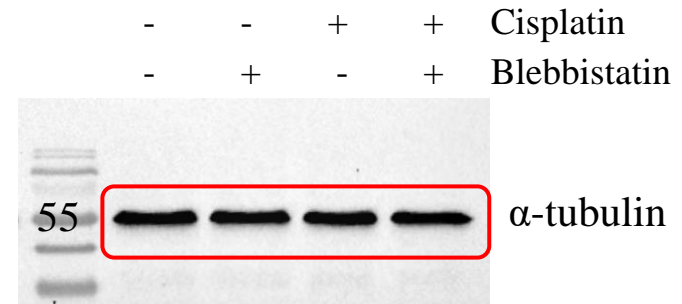

# Supplementary Figure 4 A

|   |   |   |   |                      |
|---|---|---|---|----------------------|
| - | - | + | + | Staurosporine        |
| - | + | - | + | LV-shRNA <i>Pkm2</i> |

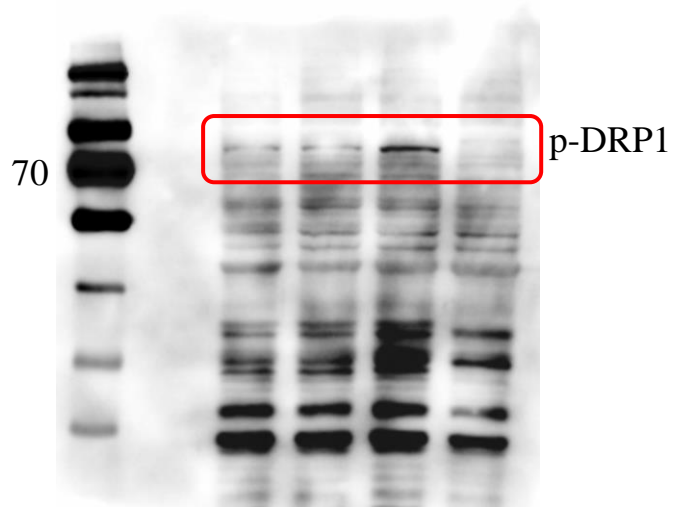

|   |   |   |   |                      |
|---|---|---|---|----------------------|
| - | - | + | + | Staurosporine        |
| - | + | - | + | LV-shRNA <i>Pkm2</i> |

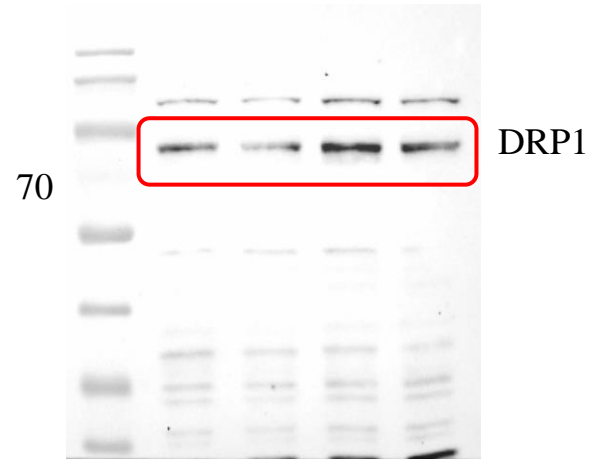

|   |   |   |   |                      |
|---|---|---|---|----------------------|
| - | - | + | + | Staurosporine        |
| - | + | - | + | LV-shRNA <i>Pkm2</i> |

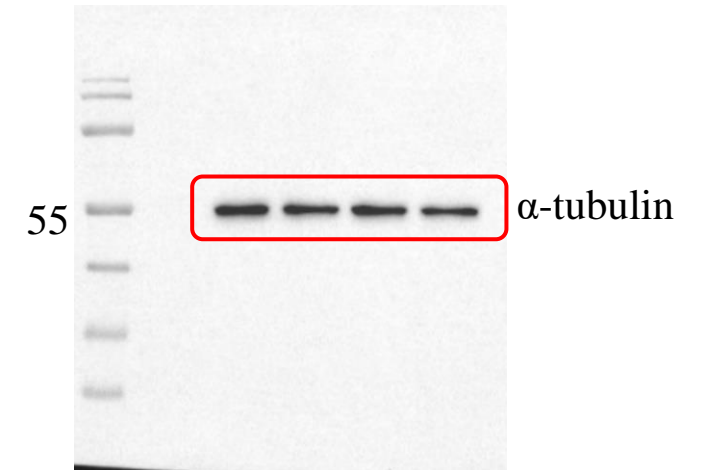

# Supplementary Figure 4 B

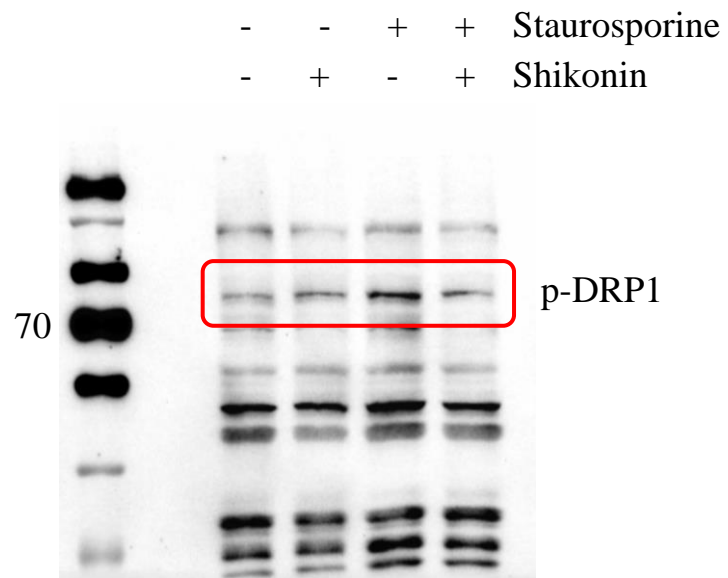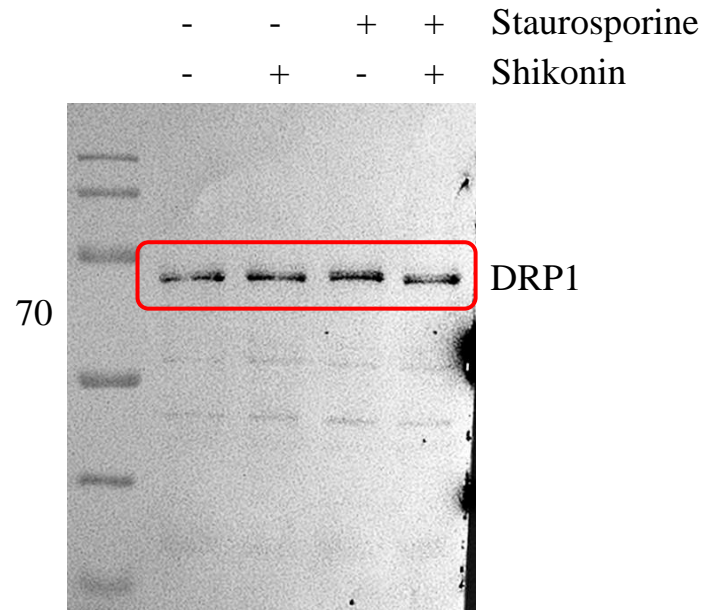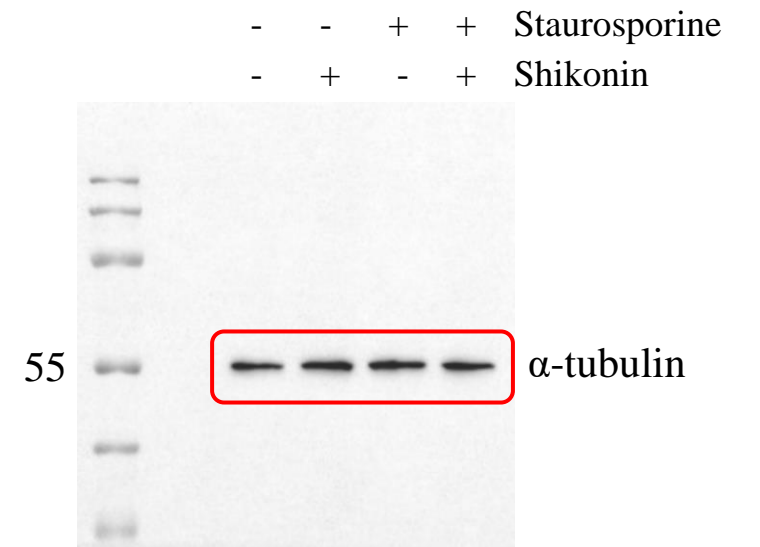

# Supplementary Figure 4 C

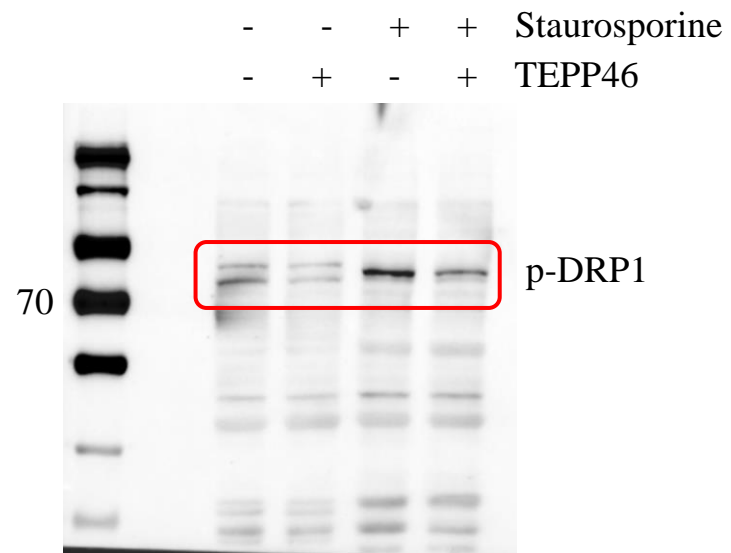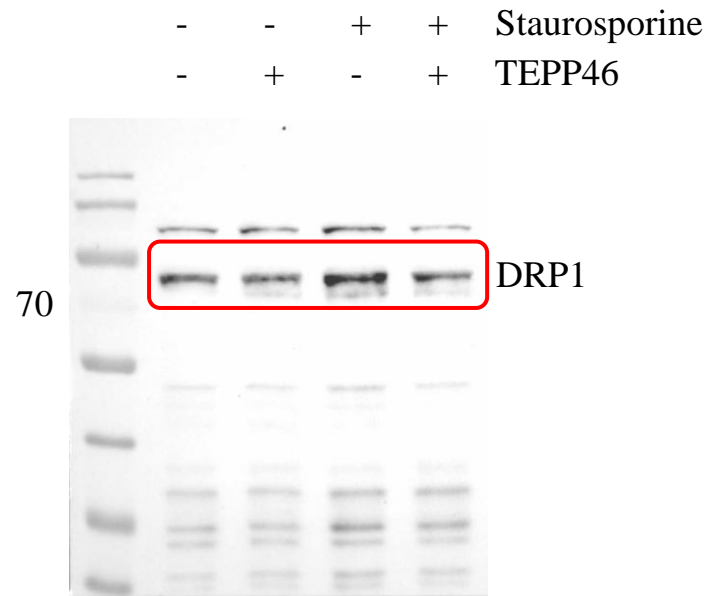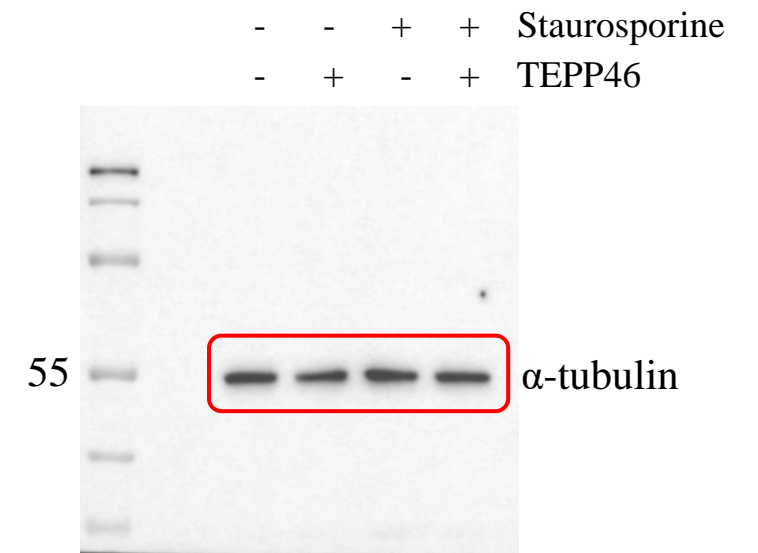



# Supplementary Figure 4 D

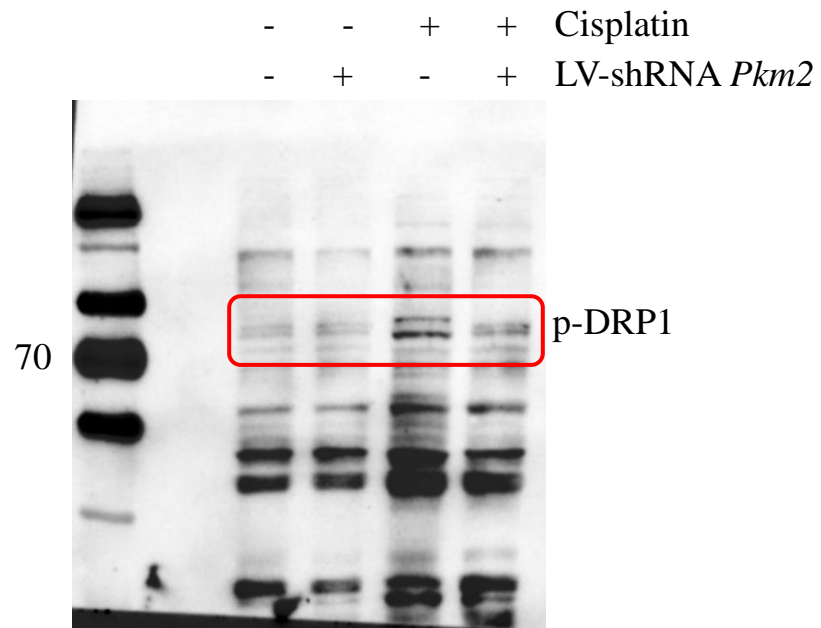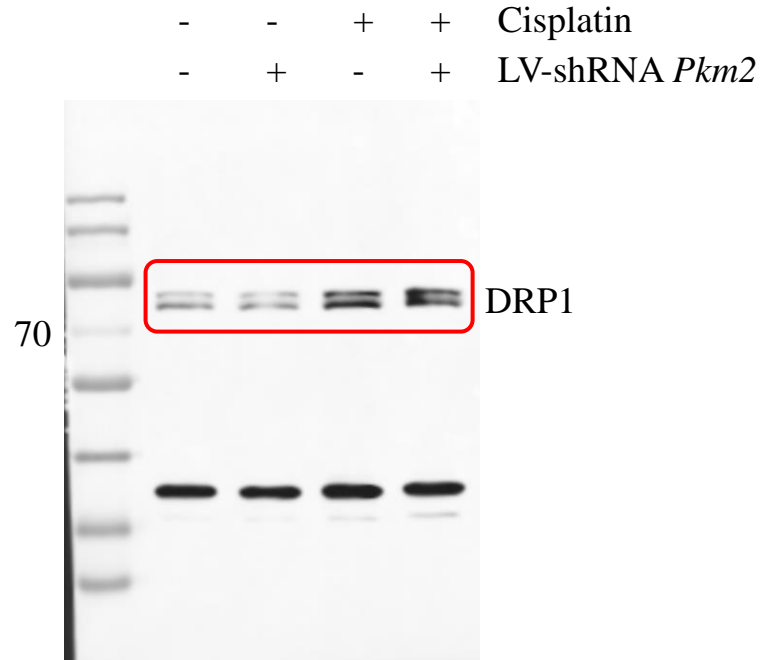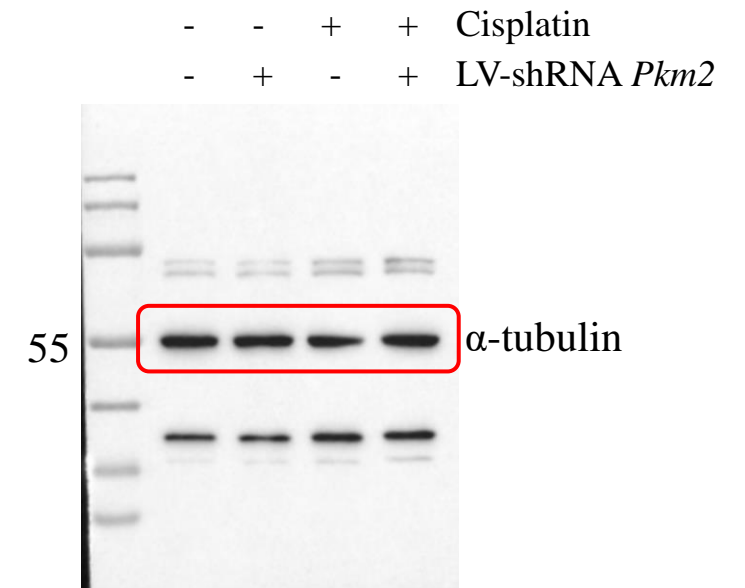

Supplementary Figure 4 E

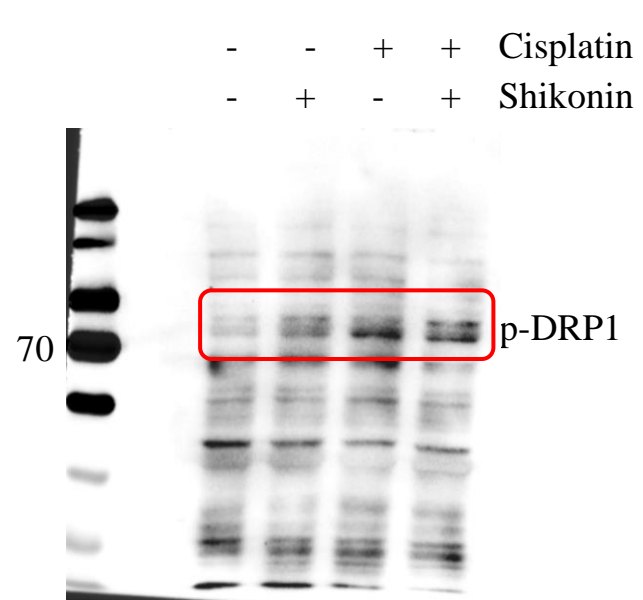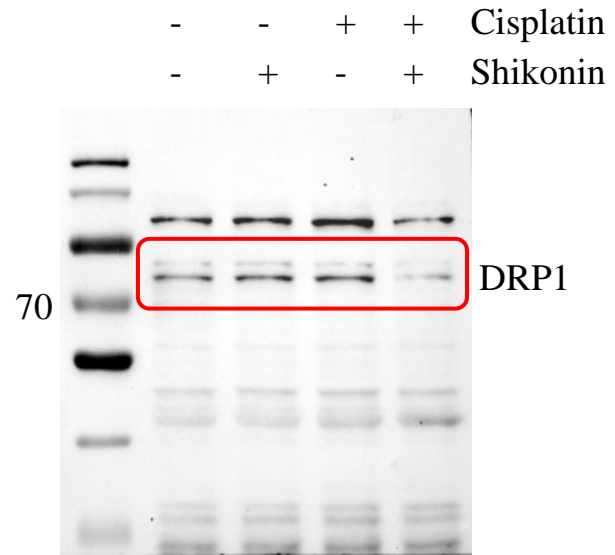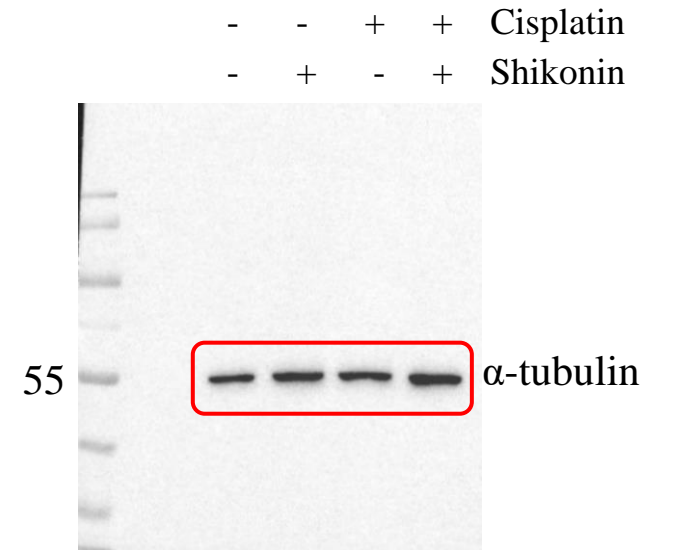

# Supplementary Figure 4 F

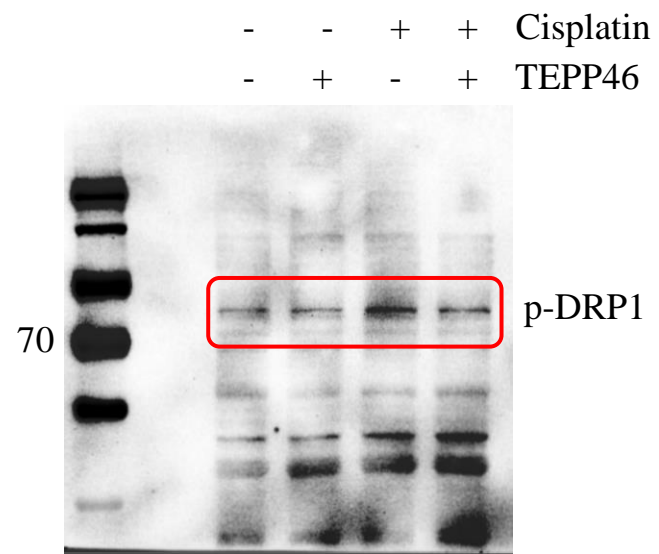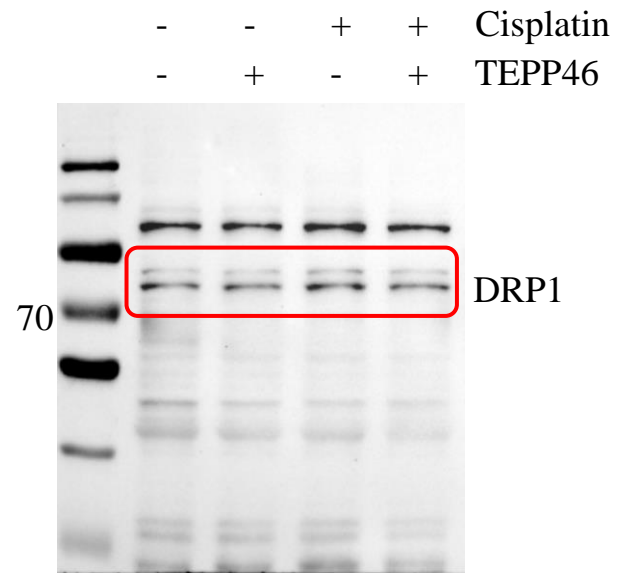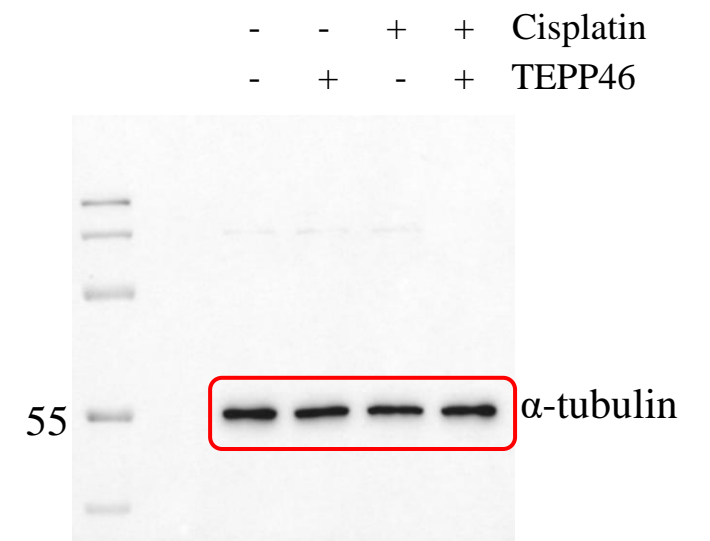

# Supplementary Figure 4 G

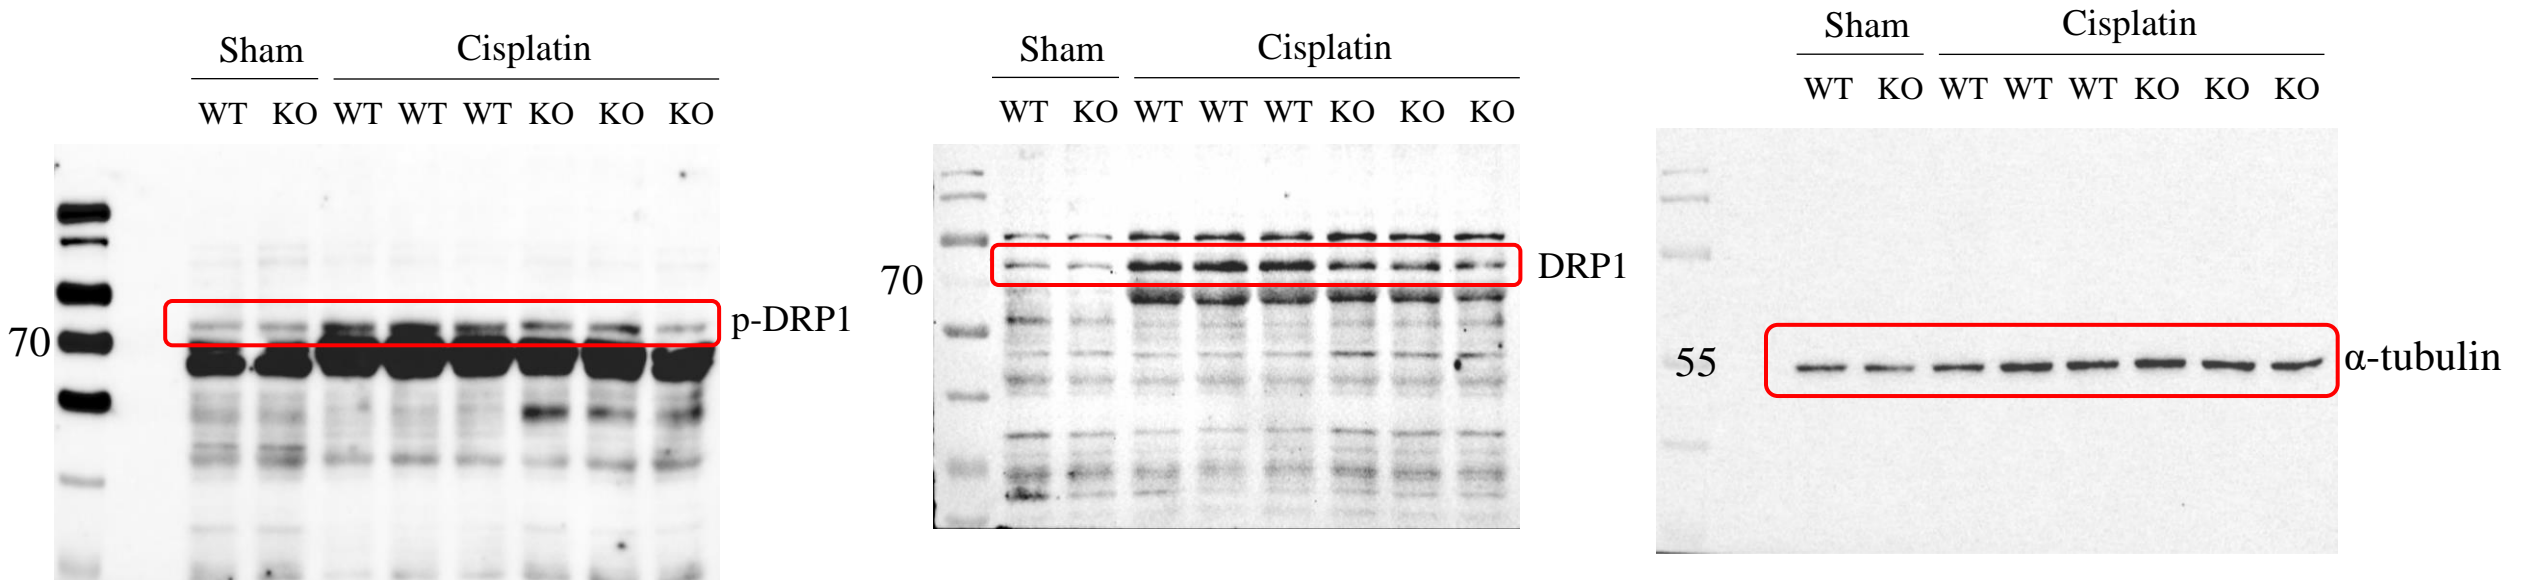

# Supplementary Figure 4 H

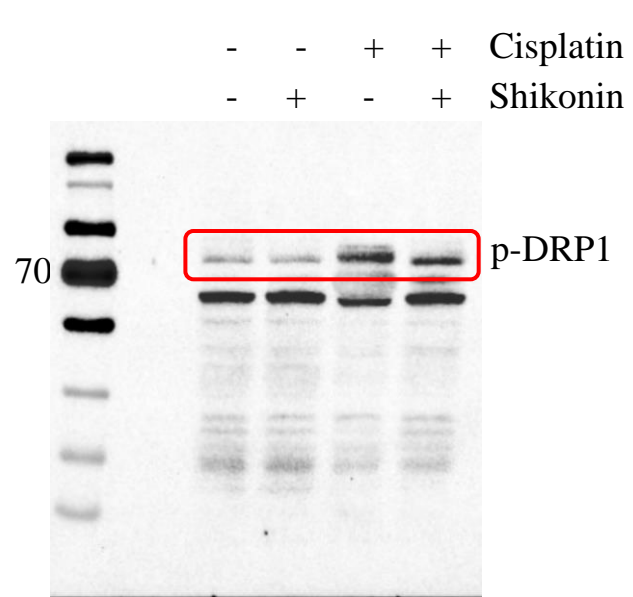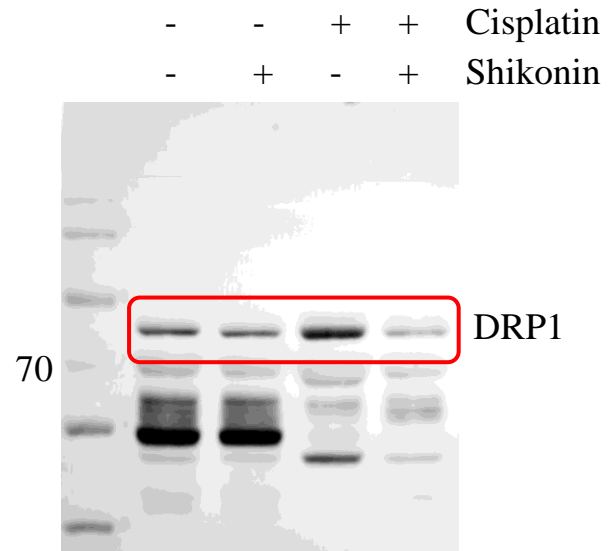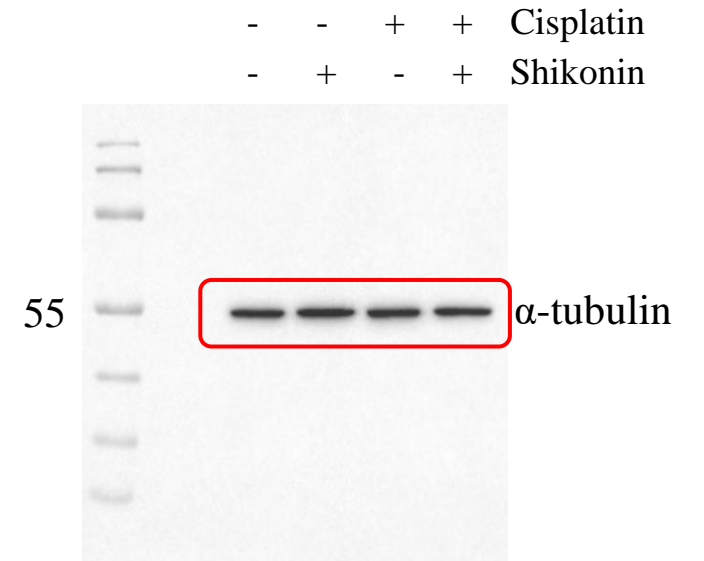

# Supplementary Figure 4 I

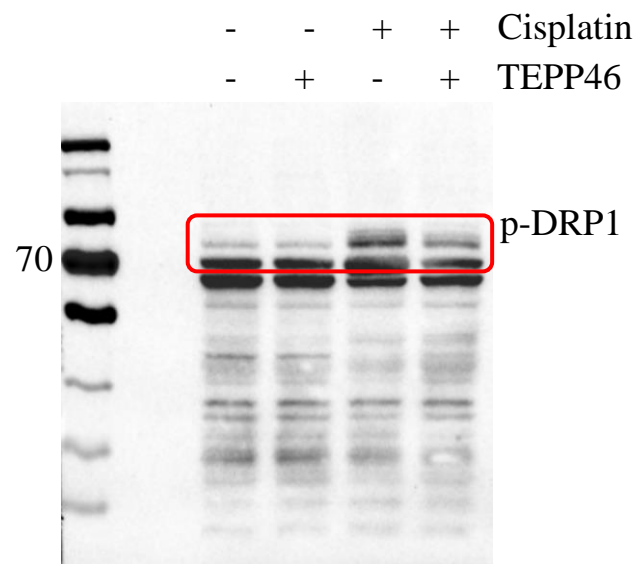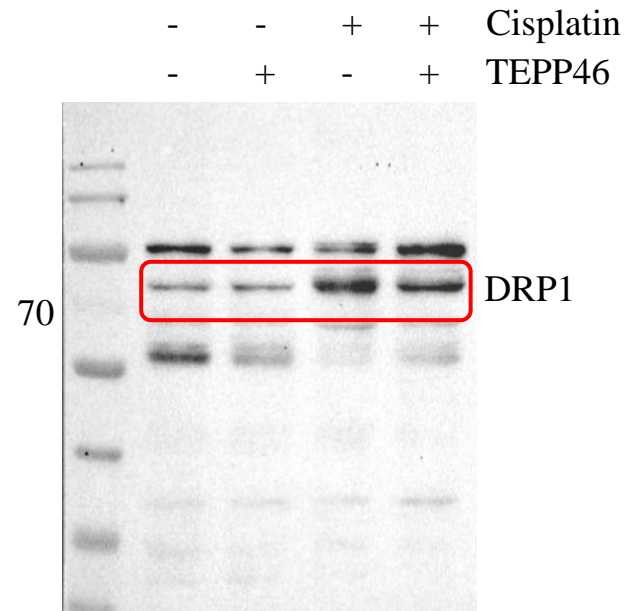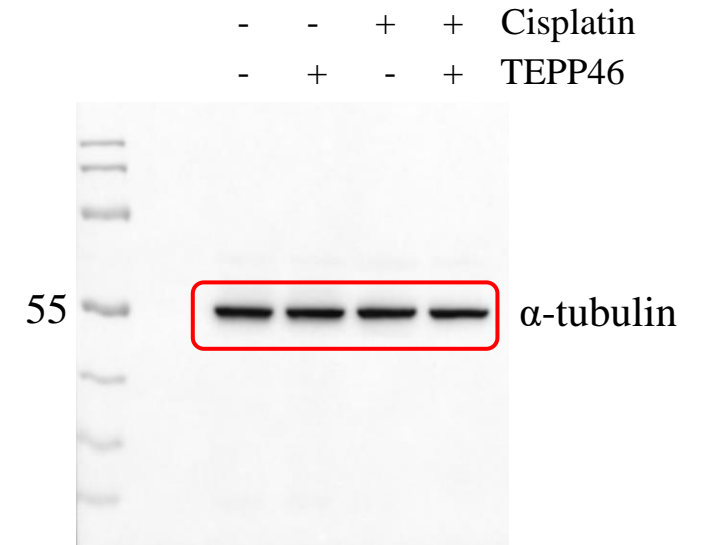

Supplementary Figure 6 C

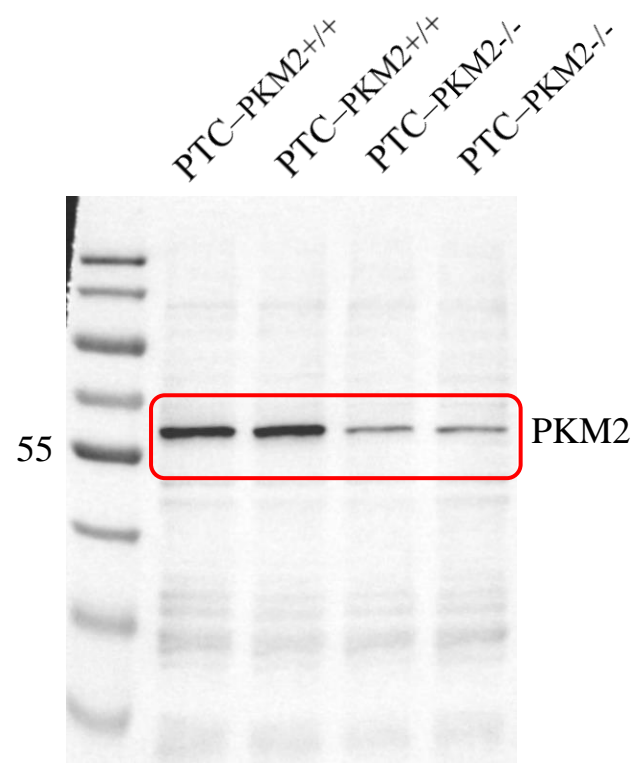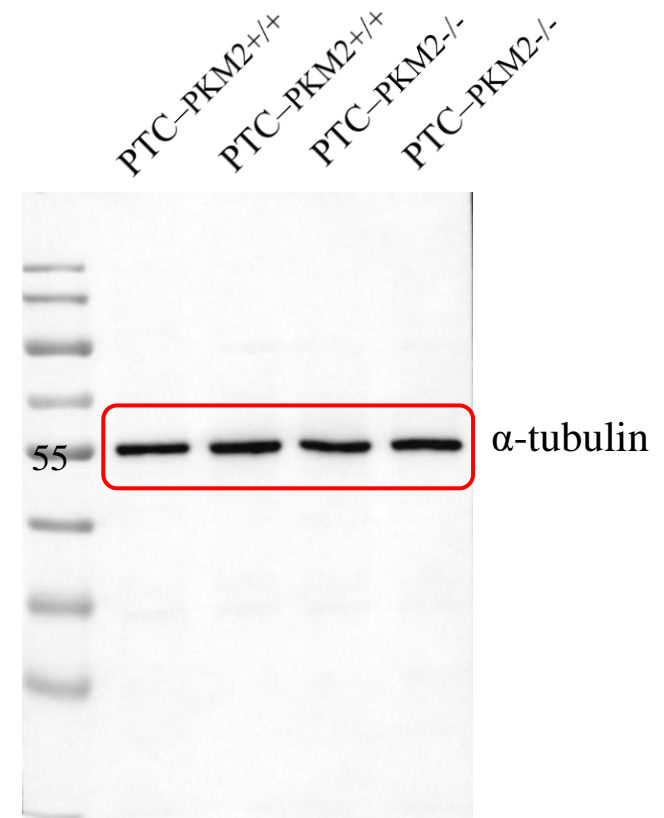

Supplement: 41419_2023_6195_MOESM2_ESM.pdf [file 41419_2023_6195_MOESM2_ESM.pdf]
